# Supplementary material for: Role of zooplankton dynamics for Southern Ocean phytoplankton biomass andglobal biogeochemical cycles
Source: Copernicus journal article supplement (doi:10.5194/bg-13-4111-2016), 2016-07-18
Supplement: Supplementary file 1 [file PlankTOM10_Manual.pdf › PlankTOM10_Manual.pdf]

# Description of the PlankTOM10 equations

April 17, 2014

## 1 Introduction

This Appendix presents a full description of the PlankTOM10 model, a global marine biogeochemical model based on the representation of ten Plankton Functional Types (PFTs), including six phytoplankton (pPFTs), three zooplankton (zPFTs) and bacteria. PlankTOM10 also represents the full cycles of C, O<sub>2</sub>, P and Si and simplified cycles for Fe and N. It currently comprises of 39 biogeochemical tracers (Table 1).

### 1.0.1 Notation

In the following sections, we will show the equations governing tracer and food-web dynamics. These equations are mostly semi-empirical, and have been developed and tested using a multitude of laboratory and field data. As long as not otherwise indicated, both tracers and their respective concentrations will be designated by capital letters, with

- $P_i$ : concentration of pPFT<sub>*i*</sub> with  $i \in \{1, 6\}$ ,
- $Z_j$ : concentration of zPFT<sub>*j*</sub>, with  $j \in \{1, 3\}$ ,
- $F_k$ : concentration of food *k*; where  $F_k$  includes phytoplankton and other food sources
- PRO: proto-zooplankton concentration,
- MES: meso-zooplankton concentration,
- MAC: macro-zooplankton concentration,
- PO<sub>4</sub>: concentration of phosphate,
- DIN: concentration of dissolved, inorganic nitrogen,
- Fe: iron concentration, and
- Si: silicate concentration.

All concentrations are calculated in  $\frac{mol}{L}$  except for chlorophyll which is in  $\frac{gCHL}{L}$ .

Tables and an index are provided which link the mathematical symbols with the variable names used in the Fortran code.

Where subscript *j* includes pico-heterotrophs in addition to the three zoo-plankton types this is stated explicitly.

The ten plankton functional types and the tracers are shown in Figure 1. Figures of this type showing the processes governing the evolution of the PFTs and tracers are included in the following sections.

Table 1: List of biogeochemical Tracers in PlankTOM10

| Abbreviation | Description                          | Units                 |
|--------------|--------------------------------------|-----------------------|
| ALK          | alkalinity                           | eq L <sup>-1</sup>    |
| BAC          | pico-heterotrophs                    | mol L <sup>-1</sup>   |
| BFE          | Fe in large POM                      | mol L <sup>-1</sup>   |
| BSI          | biogenic particulate silica          | mol L <sup>-1</sup>   |
| CAL          | sinking CaCO <sub>3</sub>            | mol L <sup>-1</sup>   |
| CCH          | chlorophyll in calcifiers            | g L <sup>-1</sup>     |
| CFE          | Fe in calcifiers                     | mol L <sup>-1</sup>   |
| COC          | calcifying phytoplankton             | mol L <sup>-1</sup>   |
| DCH          | chlorophyll in silicifiers           | g L <sup>-1</sup>     |
| DFE          | Fe in silicifiers                    | mol L <sup>-1</sup>   |
| DIA          | silicifying phytoplankton            | mol L <sup>-1</sup>   |
| DIN          | dissolved inorganic nitrogen         | mol L <sup>-1</sup>   |
| DIC          | dissolved inorganic carbon           | mol L <sup>-1</sup>   |
| DOC          | dissolved organic carbon             | mol L <sup>-1</sup>   |
| DSI          | sinking particulate silica           | mol L <sup>-1</sup>   |
| FER          | dissolved iron                       | mol L <sup>-1</sup>   |
| FCH          | chlorophyll in N <sub>2</sub> fixers | g L <sup>-1</sup>     |
| FFE          | Fe in N <sub>2</sub> fixers          | mol L <sup>-1</sup>   |
| FIX          | N <sub>2</sub> fixing phytoplankton  | mol L <sup>-1</sup>   |
| GOC          | large particulate organic carbon     | mol L <sup>-1</sup>   |
| HCH          | chlorophyll in DMSP producers        | mol L <sup>-1</sup>   |
| HFE          | Fe in DMSP producers                 | mol L <sup>-1</sup>   |
| PIC          | pico-phytoplankton                   | mol L <sup>-1</sup>   |
| MES          | meso-zooplankton                     | mol L <sup>-1</sup>   |
| MIX          | mixed phytoplankton                  | mol L <sup>-1</sup>   |
| NCH          | chlorophyll in mixed phytoplankton   | g L <sup>-1</sup>     |
| NFE          | Fe in mixed phytoplankton            | mol L <sup>-1</sup>   |
| OXY          | dissolved oxygen                     | mol L <sup>-1</sup>   |
| PCH          | chlorophyll in pico-phytoplankton    | g L <sup>-1</sup>     |
| PFE          | Fe in pico-phytoplankton             | mol L <sup>-1</sup>   |
| PIC          | pico-phytoplankton                   | mol L <sup>-1</sup>   |
| PHA          | DMSP producing phytoplankton         | mol L <sup>-1</sup>   |
| PO4          | generic macronutrient                | mol C L <sup>-1</sup> |
| POC          | small particulate organic carbon     | mol L <sup>-1</sup>   |
| PRO          | proto-zooplankton                    | mol L <sup>-1</sup>   |
| SFE          | Fe in small POM                      | mol L <sup>-1</sup>   |
| SIL          | dissolved SiO <sub>3</sub>           | mol L <sup>-1</sup>   |

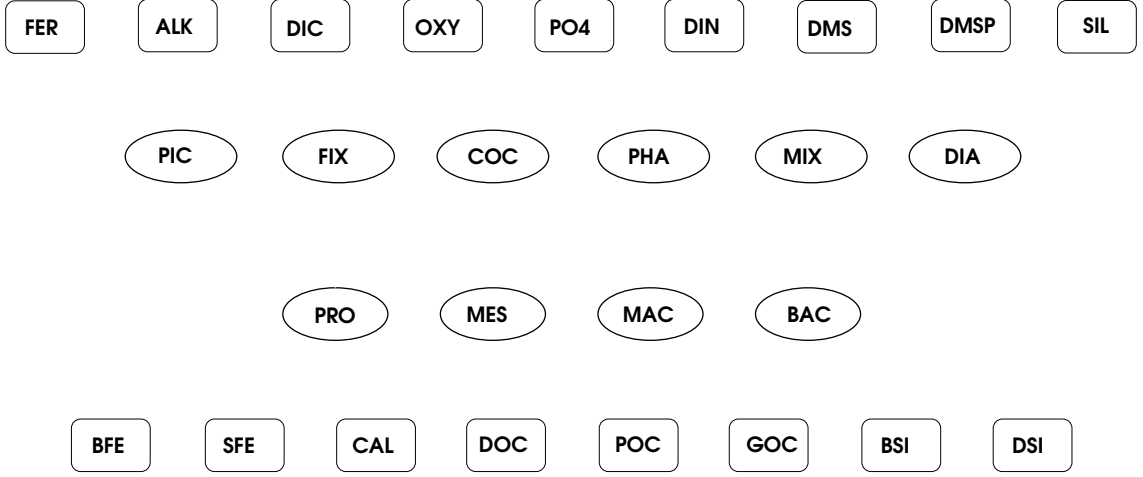

Figure 1: The constituents of PlankTOM10; PFTs are shown as ellipses and tracers as rounded rectangles. There are also tracers for the chlorophyll and iron content of the individual pPFTs but these have been omitted from the figures for clarity.

## 1.0.2 Tracer Transport

The temporal evolution of all passive tracers  $T$  is governed by the balance between its local sources and sinks ('Sources-Minus-Sinks' (SMS), biogeochemical part) and by the physical transport processes (advection and diffusion), hence

$$\frac{dT}{dt} = \nabla \cdot (\vec{u}T) + \nabla \cdot (\vec{K}\nabla T) + SMS, \quad (1)$$

where  $\vec{K}$  is the 3-dimensional tracer diffusion coefficient and  $\vec{u}$  is the fluid velocity, calculated in the physical model. To ensure numerical stability, the sinks processes in SMS are set to zero then the concentration of passive tracers fall below a set threshold ( $1.e-10$ ).

## 2 Autotrophic PFTs

### 2.1 Phytoplankton Biomass - PIC, FIX, COC, PHA, MIX, DIA

The processes governing evolution of phytoplankton biomass for each  $P_i$  is shown in Figure 2. Evolution in terms of carbon is described in this section; chlorophyll (Section 2.2) and iron in phytoplankton (Section 6.1.1) are modelled similarly. Growth of phytoplankton modifies dissolved organic carbon (Section 4.1), silica (Section 6.2), calcium carbonate (Section 5.1), phosphate, dissolved inorganic nitrogen (Section 6.3), alkalinity (Section 5.3) and oxygen (Section 6.4) in the ocean. The temporal evolution of phytoplankton biomass is given in the equation below:

$$\begin{aligned} \frac{\partial P_i}{\partial t} &= \underbrace{\mu^{P_i} P_i}_{\text{production}} - \underbrace{\mu_0^{P_i} \delta_{P_i} b_{P_i}^T P_i}_{\text{loss}} \\ &\quad - \underbrace{\sum_j g_{P_i}^{Z_j} Z_j P_i}_j \\ &\quad \underbrace{\hspace{10em}}_{\text{grazing}} \end{aligned} \quad (2)$$

$g_{P_i}^{Z_j} * Z_j * P_i$  describes the amount of biomass lost in grazing by the zPFT  $Z_j, j \in \{1, 3\}$  as described in Section 3. In the present configuration of the model all available phytoplankton are grazed so there is no mortality term.

$\mu_P$  is the phytoplankton growth rate and is a function of temperature, light and nutrient availability:

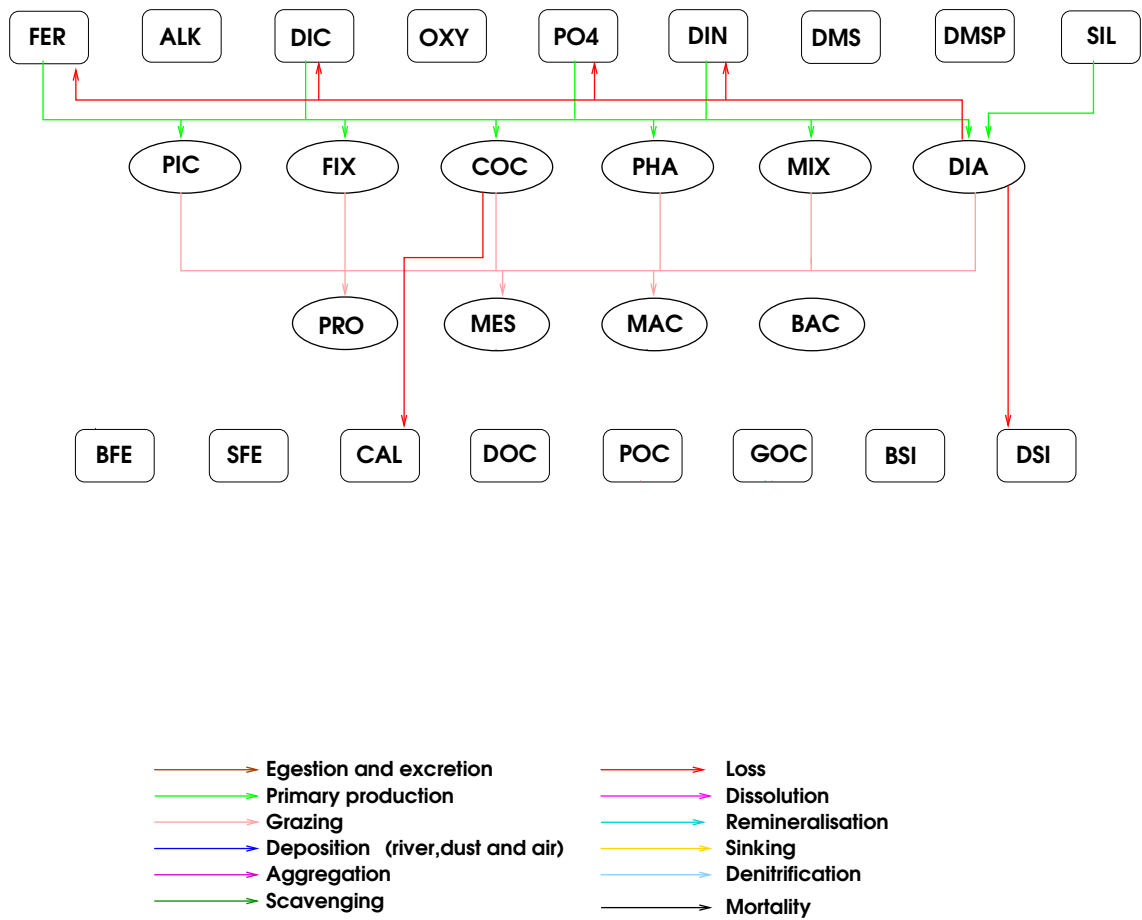

Figure 2: The processes governing the development of the phytoplankton.

$$\begin{aligned}\mu^{P_i} &= \mu_0^{P_i} * f(T) * f(PAR) * f(nut) \\ &= \mu_0^{P_i} * (1 + \delta^{P_i}) * b_{P_i}^T * L_{light}^{P_i} * L_{lim}^{P_i}\end{aligned}\quad (3)$$

where  $\mu_0^{P_i}$  is the maximum growth rate at 0° C,  $b_{P_i}$  is the temperature dependence of the growth rate and  $T$  is the temperature. For coccolithophorids the growth rate below 10° is reduced to  $(.2 + .8 * \frac{T}{10.}) * b_{coc}^T$ .

The radiation available for photosynthesis is dependent on the wavelength and the depth:

$$\begin{aligned}PAR(z + \Delta z) &= .215 * Q_{sr} * e^{-\left(\sum_i x_g + CHL^{P_i} * y_g^{P_i}\right) \Delta z} \\ &+ .215 * Q_{sr} * e^{-\left(\sum_i x_r + CHL^{P_i} * y_r^{P_i}\right) \Delta z}.\end{aligned}\quad (4)$$

where the fraction of available solar radiation  $Q_{sr}$  which is in the photosynthetically active wavelength range has been divided between the blue/green and red wavelengths,  $x_g, x_r$  are the extinction coefficients of pure water for blue/green and red wavelengths and  $y_g^{P_i}, y_r^{P_i}$  are the extinction coefficients of chlorophyll. If

$$perfrm = \alpha^{P_i} * \frac{CHL^{P_i}}{P_i} * 4.6 * PAR(z)\quad (5)$$

and

$$pctnut = \mu_0^{P_i} * (1 + \delta^{P_i}) * b_{P_i}^T * L_{lim}^{P_i}\quad (6)$$

then

$$L_{light} = 1 - e^{-\frac{perfrm}{pctnut}}\quad (7)$$

The nutrient limitation ( $L_{lim}^{P_i}$ ) determines the limitation of the growth rate due to the availability of nutrients. It is assumed that nutrient limitation follows Michaelis-Menten kinetics and that growth is determined by the least available nutrient. Hence, for phytoplankton other than silicifiers and nitrogen fixers:

$$L_{lim}^{P_i} = \min \left( \frac{PO_4}{PO_4 + K_{PO_4}^{P_i}}, \frac{\frac{Fe_{P_i}}{P_i} - Fe_{P_i}^{min}}{Fe_{P_i}^{opt} - Fe_{P_i}^{min}}, \frac{DIN}{DIN + K_{DIN}^{P_i}} \right)\quad (8)$$

for silicifiers:

$$L_{lim}^{DIA} = \min \left( \frac{PO_4}{PO_4 + K_{PO_4}^{DIA}}, \frac{\frac{Fe_{DIA}}{DIA} - Fe_{DIA}^{min}}{Fe_{DIA}^{opt} - Fe_{DIA}^{min}}, \frac{DIN}{DIN + K_{DIN}^{DIA}}, \frac{Si}{Si + K_{Si}^{DIA}} \right).\quad (9)$$

and for nitrogen fixers:

$$L_{lim}^{FIX} = \min \left( \frac{PO_4}{PO_4 + K_{PO_4}^{FIX}}, \frac{\frac{Fe_{FIX}}{FIX} - Fe_{FIX}^{min}}{Fe_{FIX}^{opt} - Fe_{FIX}^{min}}, \frac{DIN}{DIN + K_{DIN}^{FIX}} + R_{FIX} \left( 1 - \frac{DIN}{DIN + K_{DIN}^{FIX}} \right) \right)\quad (10)$$

## 2.2 Primary Production, Photosynthesis and Chlorophyll - DCH, NCH, CCH, PCH, HCH, FCH

The chlorophyll content of each phytoplankton type (DCH for silicifiers, NCH for mixed-phytoplankton, CCH for calcifiers and PCH for picophytoplankton, HCH for DMSp and FCH for N<sub>2</sub>-fixers) is modelled. Chlorophyll evolves in a very similar fashion to phytoplanktonic biomass (see equation 3), as sources and sinks of chlorophyll are of phytoplanktonic origin. The iron-light colimitation model is a dynamical photosynthesis model in which the rate of photosynthesis both controls cellular iron and chlorophyll synthesis and is controlled by their quota (Buitenhuis and Geider, 2010).

Table 2: List of Parameters and variables used to compute the evolution of phytoplankton

| Term             | Variable  | Description                                              | Defined in              |
|------------------|-----------|----------------------------------------------------------|-------------------------|
| $\delta_{P_i}$   | rn_resphy | respiration as fraction of growth                        | <i>sms.F90</i>          |
| $\mu_0^{P_i}$    | rn_mumpft | maximum growth rate at 0°C                               | <i>namelist.trc.sms</i> |
| $\mu^{P_i}$      | prophy    | productivity of phytoplankton $P_i$                      | <i>bgcpro.F90</i>       |
| $b_{P_i}$        | rn_mutpft | temperature dependence of growth rate                    | <i>namelist.trc.sms</i> |
| $\alpha^{P_i}$   | rn_alpphy | initial slope of photosynthesis vs light intensity curve | <i>namelist.trc.sms</i> |
| $PAR$            | etot      | Photosynthetically active radiation                      | <i>bgcpro.F90</i>       |
| $Q_{sr}$         | qsr       | surface solar radiation                                  | <i>traqsr.F90</i>       |
| $x_g$            | rn_ekwgrn | absorption coefficient of water for blue-green light     | <i>namelist.trc.sms</i> |
| $x_r$            | rn_ekwred | absorption coefficient of water for red light            | <i>namelist.trc.sms</i> |
| $y_g^{P_i}$      | rn_kgrphy | light absorption in blue-green                           | <i>namelist.trc.sms</i> |
| $y_r^{P_i}$      | rn_krdphy | light absorption coefficient for red                     | <i>namelist.trc.sms</i> |
| $perfrm$         | perfrm    | photosynthetic performance                               | <i>bgcpro.F90</i>       |
| $pctnut$         | pctnut    | macronutrient and temperature defined growth rate        | <i>bgcpro.F90</i>       |
| $L_{light}$      | xlim8     | Light limitation for phytoplankton growth                | <i>bgcpro.F90</i>       |
| $Fe_{P_i}^{max}$ | rn_qmaphy | Maximum Fe quota                                         | <i>namelist.trc.sms</i> |
| $Fe_{P_i}^{min}$ | rn_qmiphy | Minimum Fe quota                                         | <i>namelist.trc.sms</i> |
| $Fe_{P_i}^{opt}$ | rn_qopphy | Optimum Fe quota                                         | <i>namelist.trc.sms</i> |
| $K_{DIN}^{P_i}$  | rn_kmnphy | half-saturation coefficients for $DIN$                   | <i>namelist.trc.sms</i> |
| $K_{PO4}^{P_i}$  | rn_kmpphy | half-saturation coefficients for $PO4$                   | <i>namelist.trc.sms</i> |
| $K_{SIL}^{DIA}$  | rn_sildia | half-saturation coefficient for $SIL$ in diatoms         | <i>namelist.trc.sms</i> |
| $L_{lim}^{P_i}$  | xlimpft   | macronutrient limitation for phytoplankton growth        | <i>bgcpro.F90</i>       |

$$\begin{aligned} \frac{\partial Chl^{P_i}}{\partial t} &= \underbrace{\rho_{Chl}^{P_i} L_{light} pctnut P_i}_{production} - \underbrace{\mu_0^{P_i} \delta_{P_i} b_{P_i}^T * Chl^{P_i}}_{loss} \\ &\quad - \underbrace{\sum_j g_{P_i}^{Z_j} Z_j \frac{Chl^{P_i}}{P_i}}_{grazing}, \end{aligned} \quad (11)$$

where

$$\rho_{Chl}^{P_i} = \theta_{chl}^{P_i} * pctnut * \frac{L_{light}}{perfrm} \quad (12)$$

$\theta_{chl}^{P_i}$  is the maximum chlorophyll to carbon ratio for phytoplankton  $P_i$  and  $perfrm$  and  $pctnut$  are defined in equations 5 and 6

Table 3: List of parameters and variables used to calculate the evolution of chlorophyll

| Term                 | Variable  | Description                              | Defined in              |
|----------------------|-----------|------------------------------------------|-------------------------|
| $\theta_{Chl}^{P_i}$ | rn_thmphy | maximum CHL:C ratio                      | <i>namelist.trc.sms</i> |
| $\rho_{Chl}^{P_i}$   | rhochl    | regulation term of chlorophyll synthesis | <i>bgcpro.F90</i>       |

### 3 Heterotrophic PFT's

The temporal evolution of zooplankton and the pico-heterotrophs are shown in Figure 3.

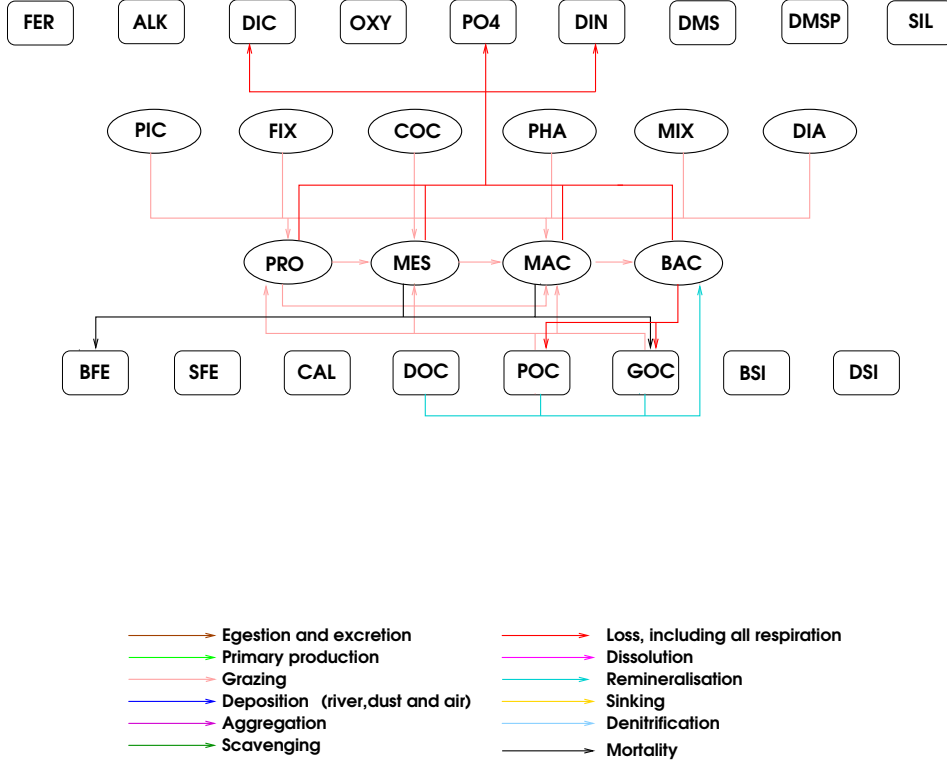

Figure 3: The processes governing the development of the zooplankton and pico-heterotrophs.

#### 3.1 Zooplankton Biomass - PRO, MES and MAC

The temporal evolution of zooplankton concentrations  $Z_j$  in PlankTOM are described as follows (Buitenhuis et al., 2006):

$$\begin{aligned}
 \frac{\partial Z_j}{\partial t} = & \underbrace{\sum_k g_{F_k}^{Z_j} * F_k * MGE * Z_j}_{\text{growth through grazing}} - \underbrace{\sum_{k=j+1}^3 g_{Z_j}^{Z_k} * Z_k * Z_j}_{\text{loss through grazing}} - \underbrace{R_{0^\circ}^{Z_j} * d_{Z_j}^T * Z_j}_{\text{basal respiration}} \\
 & - \underbrace{m_{0^\circ}^{Z_j} * c_{Z_j}^T * \frac{Z_j}{K^{Z_j} + Z_j} * \sum_i P_i}_{\text{mortality through predation}},
 \end{aligned} \tag{13}$$

where  $g_{F_k}^{Z_j}$  is the grazing of zooplankton  $Z_j$  on food source  $F_k$  and  $MGE$  is the growth efficiency.  $R_{0^\circ}^{Z_j}$  is the respiration rate at  $0^\circ\text{C}$ ,  $d_{Z_j}^T$  is the temperature dependence of the respiration ( $d^{10} = Q_{10}$ ),  $m_{0^\circ}^{Z_j}$  is the mortality rate at  $0^\circ\text{C}$ ,  $c_{Z_j}^T$  is the temperature dependence of the mortality ( $c^{10} = Q_{10}$ ).  $K^{Z_j}$  is the half saturation constant for mortality and is set to  $20 * 10^{-6}$ . The mortality term for meso- and macrozooplankton is due to predation by top predators for which the total protozooplankton and phytoplankton biomass is used as a proxy. In the presence of ice krill are protected from predation so the macrozooplankton mortality is reduced by a factor of .01.

Grazing  $g_{F_k}^{Z_j}$ , of zooplankton  $Z_j$  on food source  $F_k$  is dependent on the zooplankton preference,  $p_{F_k}^{Z_j}$ ,

the concentration of the food source and the temperature.

$$g_{F_k}^{Z_j} = g_{max}^{Z_j}(T) \frac{p_{F_k}^{Z_j}}{K^{Z_j} + \sum_i p_{F_k}^{Z_j} F_k} \quad (14)$$

The food sources  $F$  for zooplankton are summarised in Table 4. For macro-zooplankton they are phytoplankton, meso-zooplankton, proto-zooplankton, pico-heterotrophs, small and large particulate organic matter. The food sources  $F$  for meso-zooplankton are phytoplankton, proto-zooplankton, pico-heterotrophs, small and large particulate organic matter. The food sources for proto-zooplankton are phytoplankton, pico-heterotrophs, small and large particulate organic matter.

Table 4: Food sources for zooplankton and pico-heterotrophs

| Food              | Macro-zooplankton | Meso-zooplankton | Proto-zooplankton | Pico-heterotrophs |
|-------------------|-------------------|------------------|-------------------|-------------------|
| Meso-zooplankton  | *                 |                  |                   |                   |
| Proto-zooplankton | *                 | *                |                   |                   |
| Phytoplankton     | *                 | *                | *                 |                   |
| Pico-heterotrophs | *                 | *                | *                 |                   |
| Large POM         | *                 | *                | *                 | *                 |
| Small POM         | *                 | *                | *                 | *                 |
| Dissolved OM      |                   |                  |                   | *                 |

The temperature dependence of the grazing rate is:

$$g_{max}^{Z_j}(T) = g_{0^\circ}^{Z_j} b_{Z_j}^T, \quad (15)$$

where  $g_{0^\circ}^{Z_j}$  is the maximum grazing rate at  $0^\circ$  C,  $b_{Z_j}$  is the temperature dependence of the grazing rate ( $b^{10} = Q_{10}$ ),  $T$  is the local seawater temperature in  $^\circ$ Celsius. In shallow water (<600m) in the summer months under ice coverage of between .1 and .3 macrozooplankton experience enhanced recruitment (Wiedenmann et al., 2009). This is included by increasing the growth rate by a factor  $r_{MAC}$  when these conditions apply.

The model growth efficiency  $MGE$ , a function of gross growth efficiency (GGE), describes the fraction of grazed food incorporated into zooplankton biomass and basal respiration normalised to all material ingested:

$$MGE_{Z_j} = MIN \left( 1 - \xi^{Z_j}, GGE_{Z_j} + \frac{R_{0^\circ}^{Z_j} * d_{Z_j}^T * Z_j}{\sum_k g_{F_k}^{Z_j}} \right). \quad (16)$$

Equation 41 shows the possible reduction in  $MGE_{Z_j}$  when zooplankton graze on phytoplankton with a lower  $\frac{F_e}{C}$  ratio than themselves.

### 3.2 Pico-heterotrophs

The temporal evolution of bacterial concentration is modelled in a similar way to zooplankton:

$$\begin{aligned} \frac{\partial BAC}{\partial t} = & \underbrace{\lambda_{OC}^*(T) BGE * BAC}_{\text{growth through remineralisation}} - \underbrace{R_{0^\circ}^{BAC} * d_{BAC}^T * BAC}_{\text{respiration}} \\ & - \underbrace{\sum_j g_{BAC}^{Z_j} * BAC * Z_j}_{\text{grazing}} \end{aligned} \quad (17)$$

where  $BGE$  is the bacterial growth efficiency. The food sources  $F_k$  for bacteria are DOC and small and large particulate organic carbon. Mineralisation rate  $\lambda_{OC}^*(T)$  is dependent on the temperature and the available food:



Table 5: List of parameters and variables used to calculate the evolution of zooplankton

| Term                 | Variable       | Description                                 | Defined in                   |                         |
|----------------------|----------------|---------------------------------------------|------------------------------|-------------------------|
| $g_0^{Z_j}$          | rn_gramic      | maximum grazing rate at 0°                  | <i>namelist.trc.sms</i>      |                         |
|                      | rn_grames      | for proto-, meso-                           | <i>namelist.trc.sms</i>      |                         |
|                      | rn_gramac      | and macrozooplankton                        | <i>namelist.trc.sms</i>      |                         |
| $g_{max}^{Z_j}$      | graze          | grazing rate for proto-                     | <i>bgclos.F90</i>            |                         |
|                      | graze2         | meso- and                                   | <i>bgclos.F90</i>            |                         |
|                      | graze3         | macrozooplankton                            | <i>bgclos.F90</i>            |                         |
| $b_{Z_j}$            | rn_mutpft      | Temperature dependence of grazing           | <i>namelist.trc.sms</i>      |                         |
|                      |                | for proto, meso- and                        | <i>namelist.trc.sms</i>      |                         |
| $r_{MAC}$<br>$p_F^Z$ | rn_icemac      | enhanced recruitment factor under ice       | <i>namelist.trc.sms</i>      |                         |
|                      | rn_gmibac      | proto-zoo. grazing preference for bacteria  | <i>namelist.trc.sms</i>      |                         |
|                      | rn_gmigoc      | proto-zoo. grazing preference for GOC       | <i>namelist.trc.sms</i>      |                         |
|                      | rn_gmipoc      | proto-zoo. grazing preference for POC       | <i>namelist.trc.sms</i>      |                         |
|                      | rn_gmiphy      | proto-zoo. grazing preference for phyto.    | <i>namelist.trc.sms</i>      |                         |
|                      | rn_gmebac      | meso-zoo preference for bacteria            | <i>namelist.trc.sms</i>      |                         |
|                      | rn_gmegoc      | meso-zoo. grazing preference for GOC        | <i>namelist.trc.sms</i>      |                         |
|                      | rn_gmepoc      | meso-zoo. grazing preference for POC        | <i>namelist.trc.sms</i>      |                         |
|                      | rn_gmemic      | meso-zoo. grazing preference for proto-zoo. | <i>namelist.trc.sms</i>      |                         |
|                      | rn_gmephy      | meso-zoo. grazing preference for phyto      | <i>namelist.trc.sms</i>      |                         |
|                      | rn_gmabac      | macro-zoo preference for bacteria           | <i>namelist.trc.sms</i>      |                         |
|                      | rn_gmagoc      | macro-zoo preference for GOC                | <i>namelist.trc.sms</i>      |                         |
|                      | rn_gmames      | macro-zoo preference for meso-zoo           | <i>namelist.trc.sms</i>      |                         |
|                      | rn_gmamic      | macro-zoo preference for proto-zoo          | <i>namelist.trc.sms</i>      |                         |
|                      | rn_gmapoc      | macro-zoo preference for POC                | <i>namelist.trc.sms</i>      |                         |
|                      | rn_gmaphy      | macro-zoo preference for each phyto. type   | <i>namelist.trc.sms</i>      |                         |
|                      | $K^{Z_j}$      | rn_grkmic                                   | half-saturation constant for | <i>namelist.trc.sms</i> |
|                      |                | rn_grkmes                                   | proto-, meso-                | <i>namelist.trc.sms</i> |
|                      |                | rn_grkmac                                   | and macro-zooplankton        | <i>namelist.trc.sms</i> |
|                      | $\sigma^{Z_j}$ | rn_sigmic                                   | Fraction of zooplankton      | <i>namelist.trc.sms</i> |
| rn_sigmes            |                | excretion as DIC                            |                              |                         |
| rn_sigmac            |                |                                             |                              |                         |
| $\xi^{Z_j}$          | rn_unamic      | Fraction of unassimilated                   | <i>namelist.trc.sms</i>      |                         |
|                      | rn_unames      | food by proto-, meso-                       |                              |                         |
|                      | rn_unamac      | and macro-zooplankton                       |                              |                         |
| $MGE_{Z_j}$          | micrge         | model growth of efficiency                  | <i>bgcbio.F90</i>            |                         |
|                      | mesoge         | of proto-, meso- and                        |                              |                         |
|                      | macrge         | macro-zooplankton                           |                              |                         |
| $R_{0^\circ}^{Z_j}$  | rn_resmic      | Respiration at 0°C of                       | <i>namelist.trc.sms</i>      |                         |
|                      | rn_resmes      | proto-, meso-                               | <i>namelist.trc.sms</i>      |                         |
|                      | rn_resmac      | and macro-zooplankton                       | <i>namelist.trc.sms</i>      |                         |
| $d_{Z_j}$            | rn_retmic      | Temperature dependence of respiration of    | <i>namelist.trc.sms</i>      |                         |
|                      | rn_retmes      | proto-, meso-                               | <i>namelist.trc.sms</i>      |                         |
|                      | rn_retmac      | and macro-zooplankton                       | <i>namelist.trc.sms</i>      |                         |
| $m_{0^\circ}^Z$      | rn_mormes      | mortality at 0°C of meso-zoo.               | <i>namelist.trc.sms</i>      |                         |
|                      | rn_mormac      | and macro-zooplankton                       | <i>namelist.trc.sms</i>      |                         |
| $c_{Z_j}$            | rn_motmes      | temperature dependence of mortality         | <i>namelist.trc.sms</i>      |                         |
|                      | rn_motmac      | for meso and macro-zooplankton              | <i>namelist.trc.sms</i>      |                         |
| $GGE_{Z_j}$          | rn_ggemic      | Growth efficiency                           | <i>namelist.trc.sms</i>      |                         |
|                      | rn_ggemes      | of proto-, meso- and                        | <i>namelist.trc.sms</i>      |                         |
|                      | rn_ggemac      | macro-zooplankton                           | <i>namelist.trc.sms</i>      |                         |

$$\lambda_{OC}^*(T) = M_{0^\circ} * b_{BAC}^T \frac{\eta_O * \sum_k p_{F_k}^{BAC} F_k}{K_{DOC}^{BAC} + \sum_k p_{F_k}^{BAC} F_k}, \quad (18)$$

where  $M_{0^\circ}$  is the maximum mineralisation rate at  $0^\circ$  C,  $b_{BAC}$  is the temperature dependence of the mineralisation rate ( $b^{10} = Q_{10}$ ) and  $T$  is the local seawater temperature in  $^\circ$ Celsius. Each food source is associated with a preference  $p_F^{BAC}$ .  $K_{DOC}^{BAC}$  is the half-saturation constant for mineralisation of DOC. Bacterial growth is dependent on the available oxygen:  $\eta_O = \frac{OXY + 3 * 10^{-6}}{OXY + 10 * 10^{-6}}$ , which leads to a maximum bacterial growth rate in the absence of oxygen that is 0.3 times the maximum growth rate at high oxygen.

$R_{0^\circ}^{BAC}$  is the respiration rate at  $0^\circ$ C,  $d_{BAC}$  is the temperature dependence of the respiration ( $d^{10} = Q_{10}$ ).

Bacterial growth efficiency  $BGE$ , which describes the fraction of mineralised food incorporated into bacterial biomass, is a function temperature and iron availability :

$$BGE = \frac{\min(BGE_{0^\circ} - e * T, FER_{BAC} + \lambda_{POC}^* Fe + \lambda_{GOC}^* Fe)}{\max((\lambda_{DOC}^* DOC + \lambda_{POC}^* POC + \lambda_{GOC}^* GOC) * Fe / C, 1e - 25)} \quad (19)$$

where  $BGE_{0^\circ}$  is the bacterial growth efficiency at  $0^\circ$  and  $e$  is the temperature dependence of bacteria growth,  $FER_{BAC}$  is the uptake of dissolved Fe (see equation 47) and  $\lambda_{GOC}^*$ ,  $\lambda_{DOC}^*$ ,  $\lambda_{POC}^*$  are the remineralisation rates for DOC, GOC and POC respectively as defined above. The remineralisation of iron in POC and GOC is given by:

$$\lambda_{POC}^* Fe = M_{0^\circ} * b_{BAC}^T \frac{\eta_O * \sum_k p_{F_k}^{BAC} SFE}{K_{DOC}^{BAC} + \sum_k p_{F_k}^{BAC} F_k} \quad (20)$$

and

$$\lambda_{GOC}^* Fe = M_{0^\circ} * b_{BAC}^T \frac{\eta_O * \sum_k p_{F_k}^{BAC} BFE}{K_{DOC}^{BAC} + \sum_k p_{F_k}^{BAC} F_k} \quad (21)$$

Grazing of bacteria by zooplankton is described in the previous section.

Table 6: List of parameters and variables used to calculate the evolution of pico-heterotrophs

| Term                  | Variable                                       | Description                                           | Defined in                  |
|-----------------------|------------------------------------------------|-------------------------------------------------------|-----------------------------|
| $M_{0^\circ}$         | rn_grabac                                      | Maximum growth rate for bacteria                      | <i>namelist.trc.sms</i>     |
| $K_{DOC}^{BAC}$       | rn_kmobac                                      | DOC half saturation constant of bacteria              | <i>namelist.trc.sms</i>     |
| $p_F^{BAC}$           | rn_gbadoc                                      | bacterial preference for DOC                          | <i>namelist.trc.sms</i>     |
|                       | rn_gbapoc                                      | bacterial preference for POC                          | <i>namelist.trc.sms</i>     |
|                       | rn_gbagoc                                      | bacterial preference for GOC                          | <i>namelist.trc.sms</i>     |
| $BGE_{0^\circ}$       | rn_ggebac                                      | Bacterial growth efficiency at $0^\circ$              | <i>namelist.trc.sms</i>     |
| $R_{0^\circ}^{BAC}$   | rn_resbac                                      | respiration at $0^\circ$ C                            | <i>namelist.trc.sms</i>     |
| $d_{BAC}$             | rn_retbac                                      | Temperature dependence of respiration                 | <i>namelist.trc.sms</i>     |
| $e$                   | rn_ggtbac                                      | Temperature dependence of bacterial growth efficiency | <i>namelist.trc.sms</i>     |
| $FER_{BAC}$           | ubafer                                         | Uptake of dissolved Fe by bacteria                    | <i>bgsnk.F90</i>            |
| $\eta_O$              | $\frac{OXY + 3 * 10^{-6}}{OXY + 10 * 10^{-6}}$ | oxygen limitation to bacteria growth                  |                             |
| $\lambda_{POC}^* Fe$  | ofer                                           | remineralisation of Fe in POC                         | <i>bgsnk.F90</i>            |
| $\lambda_{GOC}^* Fe$  | ofer2                                          | remineralisation of Fe in GOC                         | <i>bgsnk.F90</i>            |
| $\lambda_{DOC}^* DOC$ | olimi                                          | remineralisation of DOC                               | <i>bgnul.F90, bgsnk.F90</i> |
| $\lambda_{POC}^* POC$ | orem                                           | remineralisation of POC                               | <i>bgnul.F90, bgsnk.F90</i> |
| $\lambda_{GOC}^* GOC$ | orem2                                          | remineralisation of GOC                               | <i>bgnul.F90, bgsnk.F90</i> |

### 3.2.1 Denitrification

When waters become suboxic, bacteria can also use nitrate in order to gain oxidative power for DOC remineralization. Hence, there is a (bacterial) denitrification term in the model.

## 4 Organic matter and bacterial remineralisation

The source and sinks for dissolved organic carbon (DOC) and small (POC) and large (GOC) particulate carbon are shown in Figure 4

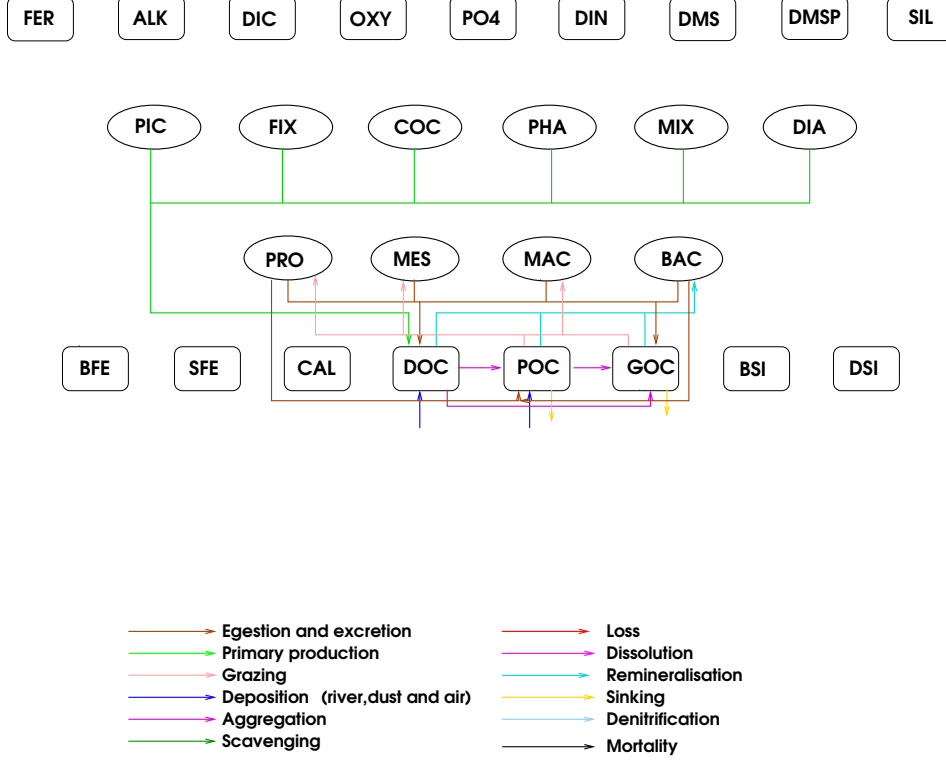

Figure 4: The source and sinks for dissolved organic carbon (DOC) and small (POC) and large (GOC) particulate carbon.

### 4.1 Dissolved organic carbon - DOC

The evolution of DOC is calculated in the following way:

$$\begin{aligned}
 \frac{\partial DOC}{\partial t} = & \underbrace{\sum \nu_{P_i}^{tot} \mu^{P_i} P_i}_{production} + \underbrace{\sum_j \left[ (1 - \sigma^{Z_j})(1 - \xi^{Z_j} - MGE^{Z_j}) \sum_k g_{F_k}^{Z_j} * Z_j * F_k \right]}_{egestion} \\
 & + \underbrace{.333R_0^{BAC} d_{BAC}^T}_{excretion} - \underbrace{\lambda_{DOC}^* DOC}_{remineralisation} - \underbrace{\Phi_{agg}^{DOC \rightarrow POC} - \Phi_{agg}^{DOC \rightarrow GOC}}_{aggregation} \\
 & + \underbrace{DOC_{riv}}_{river\ input}, \tag{22}
 \end{aligned}$$

where  $\nu_{P_i}^{tot} = \nu_{P_i} + (1 - L_{lim}^{P_i}) \nu_{P_i}^{max}$  is the fraction of phytoplankton growth which forms DOC. Bacterial degradation of DOC is given by equation 18 for DOC i.e.:

$$\lambda_{DOC}^* DOC = M_0 \circ * b_{BAC}^T \frac{\eta_0 * p_{DOC}^{BAC} * DOC}{K_{DOC}^{BAC} + p_{DOC}^{BAC} DOC}. \tag{23}$$

$\eta_0 = \frac{3 \cdot 10^{-6} + OXY}{OXY + 10^{-6}}$  leads to a maximum bacterial growth rate in the absence of oxygen that is 0.3 times the maximum growth rate at high oxygen.

The aggregation functions  $\Phi_{agg}^{X \rightarrow Y}$  are described in Section 4.2.

Table 7: List of Parameters used in bacterial remineralisation of DOC

| Term              | Variable  | Description                                     | Defined in                    |
|-------------------|-----------|-------------------------------------------------|-------------------------------|
| $\nu_{P_i}$       | rn_docphy | minimum DOC excretion ratio                     | <i>namelist.trc.sms</i>       |
| $\nu_{P_i}^{max}$ | rn_domphy | maximum DOC excretion ratio                     | <i>namelist.trc.sms</i>       |
| $Z_j$             | gramit    | Total grazing by                                | <i>bgclos.F90</i>             |
| $g_{F_i}$         | gramet    | proto,meso and                                  |                               |
|                   | gramat    | macro-zooplankton                               |                               |
| $d_{BAC}$         | rn_retbac | temperature dependence of bacterial respiration | <i>namelist.trc.sms</i>       |
| $\lambda_{OC}^*$  | olimi     | Remineralisation rate of DOC                    |                               |
|                   | orem      | Remineralisation rate of POC                    |                               |
|                   | orem2     | Remineralisation rate of GOC                    | <i>bgcnul.F90 ,bgcsnk.F90</i> |
| $K_{PO4}^{BAC}$   | rn_kmpbac | PO4 half saturation constant                    | <i>namelist.trc.sms</i>       |
| $K_{FER}^{BAC}$   | rn_kmfbac | FER half saturation constant                    | <i>namelist.trc.sms</i>       |
| $b_{BAC}$         | rn_mutpft | temp. dependence of growth rate                 | <i>namelist.trc.sms</i>       |
| $DOC_{riv}$       | depdoc    | River input of DOC                              | <i>trcini.dgom</i>            |

## 4.2 Particulate aggregation

Particle aggregation through either differential sinking or turbulent coagulation is calculated by:

$$\begin{aligned}
 \Phi_{agg}^{DOC \rightarrow POC} &= \phi_1^{DOC} \epsilon DOC^2 + \phi_2^{DOC} \epsilon DOC POC \\
 \Phi_{agg}^{DOC \rightarrow GOC} &= \phi_3^{DOC} \epsilon DOC GOC \\
 \Phi_{agg}^{POC \rightarrow GOC} &= \phi_1^{POC} \epsilon POC^2 + \phi_2^{POC} \epsilon GOC POC \\
 &\quad + \phi_3^{POC} POC GOC + \phi_4^{POC} POC^2
 \end{aligned} \tag{24}$$

In which  $\epsilon$  is the shear rate. The coefficients  $\phi$  were obtained by integrating the standard curvilinear kernels for collisions over the size range of each organic matter pool.

Table 8: List of Parameters used in particulate aggregation

| Term                               | Variable  | Description         | Defined in              |
|------------------------------------|-----------|---------------------|-------------------------|
| $\Phi_{agg}^{DOC \rightarrow POC}$ | xaggdoc   | DOC-POC aggregation | <i>bgcsnk.F90</i>       |
| $\Phi_{agg}^{DOC \rightarrow GOC}$ | xaggdoc2  | DOC-GOC aggregation | <i>bgcsnk.F90</i>       |
| $\Phi_{agg}^{POC \rightarrow GOC}$ | xagg      | POC-GOC aggregation | <i>bgcsnk.F90</i>       |
| $\phi_1^{DOC}$                     | rn_ag5doc | DOC-POC aggregation | <i>namelist.trc.sms</i> |
| $\phi_2^{DOC}$                     | 1000.     |                     |                         |
| $\phi_3^{DOC}$                     | rn_ag6doc | DOC-GOC aggregation | <i>namelist.trc.sms</i> |
| $\phi_1^{POC}$                     | rn_ag1poc | POC-GOC aggregation | <i>namelist.trc.sms</i> |
| $\phi_2^{POC}$                     | rn_ag2poc | POC-GOC aggregation | <i>namelist.trc.sms</i> |
| $\phi_3^{POC}$                     | rn_ag3poc | POC-GOC aggregation | <i>namelist.trc.sms</i> |
| $\phi_4^{POC}$                     | rn_ag4poc | POC-GOC aggregation | <i>namelist.trc.sms</i> |

## 4.3 Sinking

Using the data in Ploug et al. (2008) and applying the drag equations of Buitenhuis et al. (2001) results in a new function describing the relationship between particle density and sinking speed (Buitenhuis et al., 2012):

$$V_{sink} = k_{GOC} * MAX(\rho_{particle} - \rho_{seawater}, \rho_{min})^{S_{GOC}}, \tag{25}$$

where, if  $\rho_{GOC}$  (=1.08),  $\rho_{CAL}$  (=1.34) and  $\rho_{DSI}$  are the densities of the organic matter, CaCO<sub>3</sub>, and SiO<sub>2</sub> respectively, the particle density  $\rho_{particle}$  is calculated by:

$$\rho_{particle} = \frac{(GOC * 240. + CAL * 100. + DSI * 60.)}{\max(\frac{GOC * 240.}{\rho_{GOC}} + \frac{CAL * 100.}{\rho_{CAL}} + \frac{DSI * 60.}{\rho_{DSI}}, 10^{-15})} \tag{26}$$

and

$$\rho_{min} = \left( \frac{S_{POC}}{k_{GOC}} \right)^{S_{GOC}} \quad (27)$$

Table 9: List of Parameters used in sinking

| Term                                | Variable  | Description                                     | Defined in              |
|-------------------------------------|-----------|-------------------------------------------------|-------------------------|
| $S_{POC}$                           | rn_snkpoc | sinking speed of POC                            | <i>namelist.trc.sms</i> |
| $S_{GOC}$                           | rn_sngoc  | sinking speed parameter for GOC                 | <i>namelist.trc.sms</i> |
| $k_{GOC}$                           | rn_singoc | second sinking speed parameter for GOC          | <i>namelist.trc.sms</i> |
| $\rho_{min}$                        | dnsmin    | density at which GOC sinking speed is rn_snkpoc | <i>trclsm.dgom.h90</i>  |
| $\rho_{seawater}$                   | rhop      | density of sea-water                            |                         |
| $\rho_{particle} - \rho_{seawater}$ | xdens     | density of particle                             | <i>bgcsmk.F90</i>       |
| $V_{sink}$                          | xvsink    | sinking speed of particle                       | <i>bgcsmk.F90</i>       |

#### 4.4 Small particulate organic carbon - POC

The temporal evolution of small particulate organic carbon,  $POC$ , is calculated as

$$\begin{aligned} \frac{\partial POC}{\partial t} = & \underbrace{\xi^{PRO} * \sum_{F_i} g_{F_i}^{PRO} PRO}_{\text{proto-zooplankton unassimilated food}} - \underbrace{\sum_{Z_j} g_{POC}^{Z_j} * Z_j * POC}_{\text{grazing on POC}} \\ & + \underbrace{0.333 * R_{0^{\circ}}^{BAC} * d_{BAC}^T * BAC}_{\text{excretion}} - \underbrace{\lambda_{POC}^* POC}_{\text{POC remineralisation}} - \underbrace{S_{POC} \frac{\partial POC}{\partial z}}_{\text{POC sinking}} \\ & + \underbrace{\Phi_{agg}^{DOC \rightarrow POC}}_{\text{aggregation to POC}} - \underbrace{\Phi_{agg}^{POC \rightarrow GOC}}_{\text{aggregation to GOC}} + \underbrace{POC_{riv}}_{\text{river input}}. \end{aligned} \quad (28)$$

Here,  $\xi^{mic}$  is the unassimilated fraction of grazed material,  $g_{F_i}^{mic}$  are the grazing coefficients of proto-zooplankton on food sources  $F$  as specified in equation 13, and all others variables are as above.

Table 10: List of parameters and variables used to calculate the evolution of POC

| Term        | Variable  | Description                            | Defined in              |
|-------------|-----------|----------------------------------------|-------------------------|
| $K_{P_i}$   | rn_mokpft | half saturation constant for mortality | <i>namelist.trc.sms</i> |
| $POC_{riv}$ | deppoc    | river input of POC                     | <i>trcini.dgom.h</i>    |

#### 4.5 Large particulate organic carbon - GOC

The temporal derivative of large particulate organic carbon (GOC) is calculated as

$$\begin{aligned} \frac{\partial GOC}{\partial t} = & \underbrace{\sum_j \xi^{Z_j} \sum_k g_{F_k}^{Z_j} * Z_j * F_k}_{\text{zooplankton unassimilated food}} - \underbrace{\sum_j g_{GOC}^{Z_j} * Z_j * GOC}_{\text{loss through grazing}} + \underbrace{\sum_j m_{0^{\circ}}^{Z_j} * c^T * Z_j}_{\text{MES,MAC mortality}} \\ & + \underbrace{\Phi_{agg}^{DOC \rightarrow GOC} + \Phi_{agg}^{POC \rightarrow GOC} PHA}_{\text{aggregation to GOC}} - \underbrace{\lambda_{GOC}^* GOC}_{\text{GOC remineralisation}} - \underbrace{V_{sink} \frac{\partial GOC}{\partial z}}_{\text{GOC sinking}}. \end{aligned} \quad (29)$$

$\xi^{Z_j}$  is unassimilated fraction of material grazed by meso- and macro-zooplankton and  $m^{Z_j}$  is meso- and macro-zooplankton mortality as in equation (13).  $V_{sink}$  is the sinking rate of  $GOC$  and is calculated as equation (25).

## 5 Carbonate chemistry

### 5.1 Calcite - CAL

Calcification in the model is performed only by phytoplankton calcifiers, COC. Losses of calcifiers result in detached/sinking  $\text{CaCO}_3$ , and enters the tracer CAL. Attached  $\text{CaCO}_3$  is produced in a fixed ratio to organic matter and therefore there is no tracer for its concentration. It does however reduce alkalinity, ALK, and dissolved inorganic carbon, DIC. The source and sinks for detached carbonate (CAL), dissolved inorganic carbon (DIC) and alkalinity (ALK) are shown in Figure 5

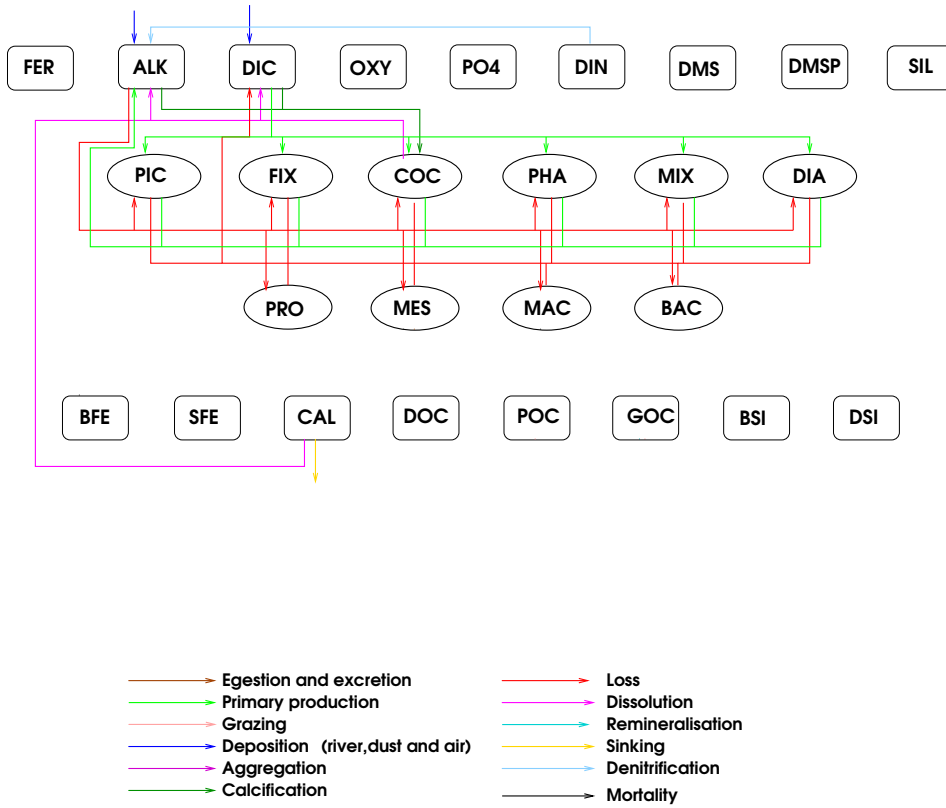

Figure 5: The source and sinks for detached carbonate (CAL), dissolved inorganic carbon (DIC) and alkalinity (ALK).

$$\frac{\partial \text{CaCO}_3^{\text{attached}}}{\partial t} = R_{CAL} \underbrace{\mu^{\text{COC}} \text{COC}}_{\text{production by COC}} \quad (30)$$

For detached  $\text{CaCO}_3$ , CAL:

$$\begin{aligned} \frac{\partial \text{CAL}}{\partial t} = & R_{CAL} (1 - R_{diss}) \left( \underbrace{\mu_0^{\text{COC}} \delta_{\text{COC}} b_{\text{COC}}^T \text{COC}}_{\text{COC loss}} + \underbrace{\sum_j g_{\text{COC}}^{Z_j} Z_j * \text{COC}}_{\text{grazing by zooplankton}} \right) \\ & - \underbrace{V_{sink} \frac{\partial \text{CAL}}{\partial z}}_{\text{sinking}} - \underbrace{\beta_{\text{CO}_3} \text{CAL}}_{\text{dissolution}}, \end{aligned} \quad (31)$$

where  $R_{CAL}$  is the calcification to particulate primary production ratio,  $R_{diss}$  is the fraction of attached coccoliths that is dissolved during losses of coccolithophores,  $V_{sink}$  is the sinking speed and is described in section 4.3, and  $\beta_{CO_3}$  is the dissolution rate:

$$\beta_{CO_3} = MIN \left( 1, \frac{1 - \delta_{sat}}{K_{CAL} + \delta_{sat}} \right) \quad (32)$$

where  $\delta_{sat}$  is the deviation from saturation and  $K_{CAL}$  is the half saturation constant for calcite dissolution.  $\beta_{CO_3}$  is  $0.25 \text{ month}^{-1}$  at the sea surface, and  $1 \text{ month}^{-1}$  at and below saturation.

CAL is calculated in *bgcbio* and reduced by the fraction dissolved in *bgclys*.

Table 11: List of parameters and variables used to calculate the evolution of calcite

| Term              | Variable  | Description                                                           | Defined in              |
|-------------------|-----------|-----------------------------------------------------------------------|-------------------------|
| $R_{CAL}$         | rn.coccal | CaCO <sub>3</sub> to Carbon ratio                                     | <i>namelist.trc.sms</i> |
| $\mu^{COC}$       | prophy    | coccolithophorid productivity                                         | <i>bgcpro.F90</i>       |
| $R_{diss}$        | rn.discal | Fraction of CaCO <sub>3</sub> dissolved during coccolithophorid death | <i>namelist.trc.sms</i> |
| $K_{CAL}$         | rn.lyscal | half saturation constant for calcite dissolution                      | <i>namelist.trc.sms</i> |
| $\delta_{sat}$    | delco3    | deviation from saturation                                             | <i>bgclys.F90</i>       |
| $\beta_{CO_3}CAL$ | remco3    | dissolved CaCO <sub>3</sub>                                           | <i>bgclys.F90</i>       |
| $V_{sink}CAL$     | sinkcal   | sinking speed of CaCO <sub>3</sub>                                    | <i>bgcsnk.F90</i>       |

## 5.2 Dissolved inorganic carbon - DIC

The temporal evolution of dissolved inorganic carbon, DIC, is calculated as:

$$\begin{aligned} \frac{\partial DIC}{\partial t} = & \underbrace{- \sum_i \mu^{P_i} * (1 + \nu_{P_i}^{TOT}) P_i}_{\text{primary production}} + \underbrace{\text{consum}}_{\text{consumption}} - \underbrace{R_{CAL} \mu^{COC} COC}_{\text{attached CaCO}_3} \\ & + R_{diss} R_{CAL} \left( \underbrace{\mu_0^{P_1} \delta_{COC} b_{COC}^T COC}_{\text{COC loss}} + \underbrace{\sum_j g_{COC}^{Z_j} Z_j COC}_{\text{grazing by zooplankton}} \right) \\ & + \underbrace{DIC_{riv}}_{\text{river input}} + \underbrace{\beta_{CO_3} CAL}_{\text{dissolution}} + \underbrace{F_{air-sea}^{CO_2}}_{\text{air-sea flux}}. \end{aligned} \quad (33)$$

In addition to the inclusion of grazing by zooplankton remineralisation by bacteria is included as a function of their growth efficiency and respiration (in this case subscript j includes the pico-heterotrophs):

$$\begin{aligned} \text{consum} = & \underbrace{\sum_j \sigma^{Z_j} * (1 - \xi^{Z_j} - MGE^{Z_j}) \sum_k g_{F_k}^{Z_j} * Z_j * F_k}_{\text{foodrespiration}} \\ & + \underbrace{(1 - BGE) * (\lambda_{DOC}^* DOC + \lambda_{POC}^* POC + \lambda_{GOC}^* GOC)}_{\text{remineralisation}} \\ & + \underbrace{\sum_{j=1}^3 R_{0^{\circ}}^{Z_j} d_{Z_j}^T Z_j}_{\text{basal respiration}} + \underbrace{.333 R_{0^{\circ}}^{BAC} d_{BAC}^T BAC}_{\text{respiration}} + \underbrace{\sum_i \delta_{P_i} b_{P_i}^T \mu_0^{P_i} P_i}_{\text{loss}}. \end{aligned} \quad (34)$$

The bacterial growth efficiency,  $BGE$ , is given by Equation 19. The terms for attached CaCO<sub>3</sub> and production of DIC by dissolution are described in Section 5.1. River deposition  $DIC_{riv}$  is the input of DIC from rivers, see Section 8.6. The air-to-sea flux is described in section 7.

Dissolved inorganic carbon is calculated in *bgcbio*; in *bgclys* the CaCO<sub>3</sub> dissolution to DIC is included while in *bgcflx* the air-sea flux of DIC is added.

Table 12: List of Parameters used in the evolution of DIC and ALK

| Term              | Variable | Description                | Defined in           |
|-------------------|----------|----------------------------|----------------------|
| $BGE$             | bactge   | bacteria growth efficiency | $bgcbio, bgcsnk.F90$ |
| $DIC_{riv}$       | depdic   | river input of DIC         | $river.nc$           |
| $R_{\frac{N}{C}}$ | alknut   | N+S+P to Carbon ratio      | $trcini.dgom.F90$    |
| $DIC_{riv}$       | depdic   | River deposition of DIC    | $trcini.dgom.F90$    |

### 5.3 Alkalinity - ALK

The temporal evolution of alkalinity is calculated as:

$$\begin{aligned}
 \frac{\partial ALK}{\partial t} = & R_{\frac{N}{C}} \left( \underbrace{\sum_i \mu^{P_i} P_i (1 + \nu_{P_i}^{tot})}_{production} - \underbrace{consum}_{consumption} \right) - \underbrace{2 * R_{CAL} \mu^{coc} COC}_{calcification} \\
 & + \underbrace{2 R_{CAL} R_{diss} (\mu_0^{COC} \delta_{coc} b_{COC}^T COC + \sum_j g_{coc}^{Z_j} Z_j COC)}_{dissolution} \\
 & + \underbrace{DIC_{riv}}_{river\ input} + \underbrace{N_{denit}}_{denitrification} + \underbrace{2 * \beta_{CO_3} CaCO_3}_{dissolution}
 \end{aligned} \tag{35}$$

where  $R_{\frac{N}{C}} = \frac{N+S+P}{C} = \frac{16+6+1}{122}$  is the effect of nutrient uptake and remineralisation on alkalinity (Wolf-Gladrow et al., 2007). The terms for the production of attached  $CaCO_3$ , dissolved COC and dissolved  $CaCO_3$  are described in Section 5.1. River deposition,  $DIC_{riv}$  is described in Section 8.6 and denitrification,  $N_{denit}$  in Section 6.3.

## 6 Nutrients and Oxygen

The processes governing the evolution of dissolved iron (FER), large (BFE) and small (SFE) particulate iron, dissolved silica (SIL), biogenic silica (BSI) and detrital silica (DSI) are shown in Figure 6.

The processes governing the evolution of phosphate (PO4), dissolved inorganic nitrogen (DIN) and oxygen (OXY) are shown in Figure 7.

### 6.1 The Iron Cycle

#### 6.1.1 Fe in PFTs

The iron content of phytoplankton (DFE for silicifiers, NFE for mixed-phytoplankton, CFE for calcifiers, PFE for picophytoplankton, HFE for DMS producers and FFE for  $N_2$ -fixers) is given by:

$$\begin{aligned}
 \frac{\partial Fe^{P_i}}{\partial t} = & \underbrace{\mu_0^{P_i} (1 + \delta^{P_i}) \rho_{Fe}^{P_i} L_{lim.Fe}^{P_i} b_{P_i}^T P_i}_{production} - \underbrace{\delta_{P_i} * \mu_0^{P_i} * b_{P_i}^T * Fe^{P_i}}_{loss} \\
 & - \underbrace{\sum_j g_{P_i}^{Z_j} Z_j * Fe^{P_i}}_{grazing}
 \end{aligned} \tag{36}$$

$\rho_{Fe}^{P_i}$  describes the iron-light colimitation to phytoplankton growth (Buitenhuis and Geider, 2010) and is given by:

$$\rho_{Fe}^{P_i} = \left( \frac{(Fe_{th} Fe_{P_i}^{max} - Fe_{P_i}^{max})(Fe_{P_i}^{max} - \frac{Fe_{P_i}}{P_i})}{(Fe_{P_i}^{max} - Fe_{P_i}^{min})} + Fe_{P_i}^{max} \right) * Light \tag{37}$$



For phytoplankton other than nitrogen fixers and silicifiers the nutrient limitation is given by:

$$L_{limFe}^{P_i} = \min \left( \frac{PO_4}{PO_4 + K_{PO_4}^{P_i}}, \frac{FER}{FER + K_{FER}^{P_i}}, \frac{DIN}{DIN + K_{DIN}^{P_i}} \right) \quad (38)$$

for silicifiers

$$L_{limFe}^{DIA} = \min \left( \frac{PO_4}{PO_4 + K_{PO_4}^{DIA}}, \frac{FER}{FER + K_{FER}^{DIA}}, \frac{DIN}{DIN + K_{DIN}^{DIA}}, \frac{Si}{Si + K_{Si}^{DIA}} \right). \quad (39)$$

and for nitrogen fixers:

$$L_{limFe}^{FIX} = \min \left( \frac{PO_4}{PO_4 + K_{PO_4}^{FIX}}, \frac{FER}{FER + K_{FER}^{FIX}}, \frac{DIN}{DIN + K_{DIN}^{FIX}} + R_{FIX} \left( 1 - \frac{DIN}{DIN + K_{DIN}^{FIX}} \right) \right) \quad (40)$$

The Fe/C ratio of zooplankton is fixed. If zooplankton graze on phytoplankton that have a higher Fe:C ratio than themselves, the excess is remineralised to dissolved iron. If the phytoplankton Fe/C ratio is lower than zooplankton Fe:C, the model growth efficiency (MGE) is decreased:

$$MGE^{Z_j} = \min \left( 1 - \xi^{Z_j}, GGE_{Z_j} + \frac{R_{0^{\circ}}^{Z_j} d_{Z_j}^T Z_j}{\sum_k g_{F_k}^{Z_j}}, \frac{\sum_k g_{F_k}^{Z_j} \frac{Fe_{F_k}}{C_{F_k}} (1 - \xi^{Z_j})}{\max \left( \sum_k g_{F_k}^{Z_j} \left( \frac{Fe}{C} \right)_Z, 1e - 25 \right)} \right) \quad (41)$$

### 6.1.2 Fe in detrital matter - BFE, SFE

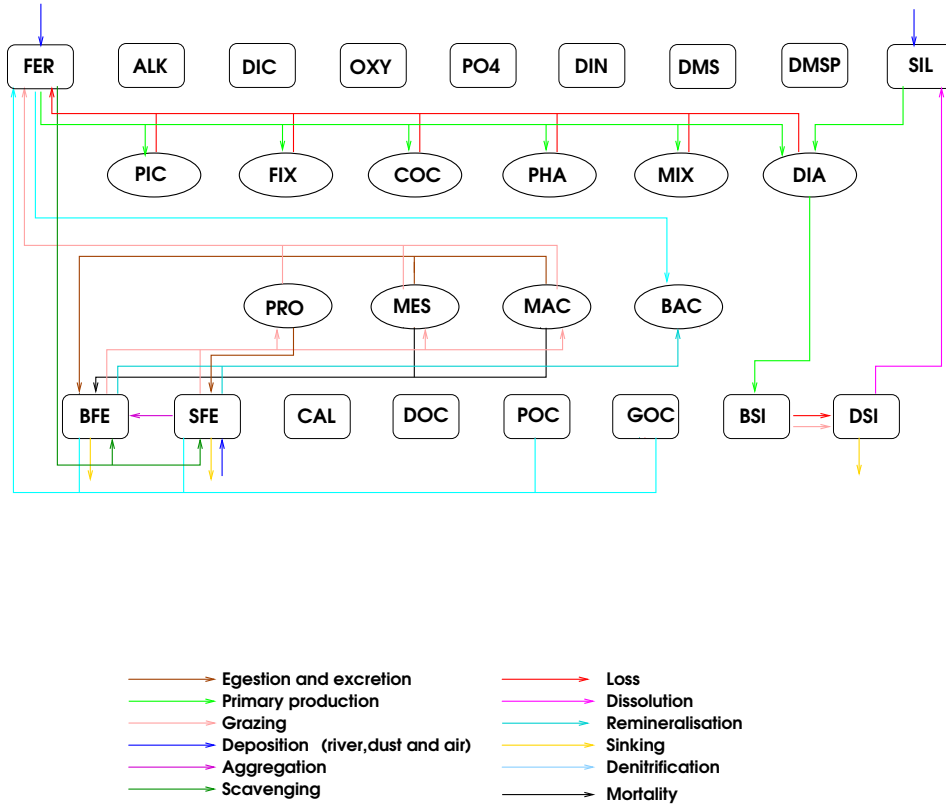

Figure 6: The sources and sinks for dissolved iron (FER), large (BFE) and small (SFE) particulate iron, dissolved silica (SIL), biogenic silica (BSI) and detrital silica (DSI).

Iron in detrital matter is divided into BFE in large organic particles (GOC) and SFE in small organic particles (POC). Production terms of particulate organic iron follow the Fe/C ratio of the source organisms.

There is no iron in DOM, but iron is added from dissolved iron to particulate organic iron during degradation of DOM. Degradation of POM conserves the Fe:C ratio of POM. The bottom correction removes as much carbon from the bottom water layers as is added by rivers (Section 8.6). Because iron is scavenged, the Fe/C ratio of POM sometimes becomes excessive. It is therefore set to a maximum, currently  $2^{-6}$  mol:mol.

$$\begin{aligned}
\frac{\partial BFE}{\partial t} = & \underbrace{Fe_{scave}(POC + GOC + DSI + CAL)GOC}_{scavenging} - \underbrace{\sum_j g_{GOC}^{Z_j} * Z_j * GOC}_{grazing loss} \frac{BFE}{GOC} \\
& + \underbrace{\left(\frac{Fe}{C}\right)_Z \sum_{j=MES,MAC} m_{0^{\circ}}^{Z_j} c^T z^j}_{mortality} + \underbrace{\sum_{j=MES,MAC} \xi^{Z_j} \sum_k g_{F_k}^{Z_j} * Z_j * F_k}_{unassimilated food} \frac{Fe_{F_k}}{F_k} \\
& + \underbrace{\phi_{agg}^{POC \rightarrow GOC} \frac{SFE}{POC}}_{Fe aggregation} - \underbrace{\lambda_{GOC}^* Fe}_{remineralisation} - \underbrace{V_{sink} \frac{\partial BFE}{\partial z}}_{sinking of BFE} \quad (42)
\end{aligned}$$

$$\begin{aligned}
\frac{\partial SFE}{\partial t} = & \underbrace{Fe_{scave} * (POC + GOC + DSI + CAL) * POC}_{scavenging} \\
& - \underbrace{\sum_j g_{POC}^{Z_j} * Z_j * POC}_{grazing loss} \frac{SFE}{POC} + \underbrace{\xi^{MIC} \sum_k g_{F_k}^{MIC} * MIC * F_k}_{unassimilated food} \frac{Fe_{F_k}}{F_k} \\
& - \underbrace{\phi_{agg}^{POC \rightarrow GOC} \frac{SFE}{POC}}_{Fe aggregation} - \underbrace{\lambda_{POC}^* Fe}_{remineralisation} - \underbrace{S_{POC} \frac{\partial SFE}{\partial z}}_{sinking of SFE} + \underbrace{\left(\frac{Fe}{C}\right)_Z}_{river input} POC_{riv} \quad (43)
\end{aligned}$$

The remineralisation  $\lambda_{POC}^* Fe$  is given by equation 18.  $Fe_{scav}$  is described below.

### 6.1.3 Dissolved Fe - FER

The temporal evolution of dissolved iron, FER, is calculated as follows:

$$\begin{aligned}
\frac{\partial FER}{\partial t} = & - \underbrace{\mu_0^{P_i} (1 + \delta^{P_i}) \rho_{Fe}^{P_i} L_{limFe}^{P_i} b_{P_i}^T P_i}_{production} + \underbrace{\delta_{P_i} * \mu_0^{P_i} * b_{P_i}^T * Fe^{P_i}}_{loss} \\
& + \underbrace{\sum_j \left( \sum_k g_{f_k}^{z_j} * Z_j * F_k \frac{Fe_{F_k}}{F_k} (1 - \xi^{Z_j}) - \left(\frac{Fe}{C}\right)_Z \sum_k g_{F_k}^{Z_j} * Z_j * F_k * MGE^{Z_j} \right)}_{grazing} \\
& + \underbrace{FER_{remin.POC.GOC} + FER_{remin.BFE.SFE}}_{mineralisation} - \underbrace{FER_{BAC}}_{bacterial demand for FER} \\
& - \underbrace{Fe_{scav}}_{scavenging} + \underbrace{Fe_{dep}}_{dust deposition} + \underbrace{Fe_{riv}}_{river input} \quad (44)
\end{aligned}$$

Iron is input from rivers, see Section 8.6, and the dissolution of dust from the atmosphere, see Section 8.5. Iron is taken up by phytoplankton during primary production (see above). When iron concentration is above 0.6 nM, it is scavenged by POM: the evolution of scavenged iron,  $Fe_{scav}$  is calculated as:

$$\begin{aligned}
Fe_{scav} = & k_{scm} + k_{sc} * (POC + GOC + CAL + DSI) * 1e6 \\
& * \frac{-(1 + l_{Fe} k_{eq} - FER k_{eq}) + ((1 + l_{Fe} k_{eq} - FER k_{eq})^2 + 4 FER k_{eq})^{0.5}}{2 k_{eq}} \quad (45)
\end{aligned}$$

where  $k_{scm}$  and  $k_{sc}$  are scavenging parameters and  $k_{eq}$  is given by:

$$k_{eq} = 10^{17.27 - \frac{1565.7}{T-19}} \quad (46)$$

The iron ligand,  $l_{Fe}$  is set to a value of  $.6 * 10^{-9}$  at latitudes North of 30S and below 200m depth,  $.3 * 10^{-9}$  South of 40S and below 200 m, 0 above 100m depth, and linearly interpolated in between. Part of the scavenged iron is added to POM, and part is removed from the model.

Bacteria demand for Fe can be supplied from the remineralisation of BFE and SFE and from dissolved iron. The net effect on FER may be an increase - if remineralisation exceeds the bacterial demand or a decrease if demand exceeds that supplied by remineralisation. Bacterial demand for FER,  $FER_{BAC}$  is:

$$FER_{BAC} = \frac{BGE \left( \frac{Fe}{C} \right)_Z * (\lambda_{DOC}^* DOC + \lambda_{POC}^* POC + \lambda_{GOC}^* GOC - \lambda_{POC}^* Fe - \lambda_{GOC}^* Fe) FER}{K_{FER}^{BAC} + FER} \quad (47)$$

or zero if this is negative.

The contribution to FER from remineralisation of POC and GOC is:

$$FER_{remin.POC.GOC} = \lambda_{POC}^* Fe + \lambda_{GOC}^* Fe \quad (48)$$

The remineralisation of BFE and SFE contributes to FER by:

$$FER_{remin.BFE.SFE} = -BGE \left( \frac{Fe}{C} \right)_Z * (\lambda_{DOC}^* DOC + \lambda_{POC}^* POC + \lambda_{GOC}^* GOC - \lambda_{POC}^* Fe - \lambda_{GOC}^* Fe) \quad (49)$$

or zero if this is negative.

Table 13: List of parameters and variables used to calculate the evolution of iron

| Term                  | Variable  | Description                                  | Defined in              |
|-----------------------|-----------|----------------------------------------------|-------------------------|
| $Fe_{th}$             | rn_rhfphy | maximum/minimum Fe uptake rate               | <i>namelist.trc.sms</i> |
| $FER_{remin.BFE.SFE}$ | rbafer    | Release of dissolved Fe by bacteria          | <i>bgcsnk.F90</i>       |
| $Fe_{scav}$           | xscave    | Iron scavenged by particulate organic matter | <i>bgcsnk.F90</i>       |
| $Fe_{riv}$            | depfer    | River deposition                             | <i>trcini.dgom.F90</i>  |
| $Fe_{dep}$            | irondep   | Dust deposition                              | <i>bgcbio.F90</i>       |
| $k_{sc}$              | rn_scofer | Scavenging rate for iron by particles        | <i>namelist.trc.sms</i> |
| $k_{scm}$             | rn_scmfer | Minimum scavenging rate for iron             | <i>namelist.trc.sms</i> |
| $k_{eq}$              | xkeq      | Scavenging rate parameter                    | <i>bgcsnk.F90</i>       |
| $l_{Fe}$              | ligfer    | iron ligand concentration                    | <i>bgcsnk.F90</i>       |

## 6.2 The Silicate cycle

Silica is input from rivers and the dissolution of dust from the atmosphere. Growth of diatoms consumes dissolved silica (SIL) from the water to produce hydrated silica (biogenic silica BSI). Loss processes of diatoms produce sinking particulate silica (DSI).

### 6.2.1 Dissolved $SiO_3$ - SIL

The temporal evolution of dissolved silica is calculated as:

$$\begin{aligned} \frac{\partial SIL}{\partial t} = & \underbrace{-0.15 \min \left( 1, \frac{SIL}{K_{SIL}} \right) \left( \frac{Si}{C} \right)_{DIA} \mu^{DIA} DIA}_{production} + \underbrace{\beta_{Si} DSI}_{dissolution} \\ & + \underbrace{SIL_{riv}}_{river\ input} + \underbrace{SIL_{dep}}_{dust\ deposition} \end{aligned} \quad (50)$$

where  $\mu^{DIA} DIA$  is the primary production, in terms of carbon, of diatoms,  $K_{SIL}$  is the half saturation constant for  $SiO_3$  in diatoms,  $\beta_{Si}$  is the remineralisation rate of silica which is dependent on temperature,

T and oxygen  $OXY$ :

$$\beta_{Si} = \min \left( 1.32 * 10^{16} e^{\frac{-11200}{(273.15+T)}}, .1 \right) \eta_O. \quad (51)$$

$\left(\frac{Si}{C}\right)_{DIA}$  increases with iron stress and silicate availability:

$$\left(\frac{Si}{C}\right)_{DIA} = 4. - 3 * \min \left( \frac{\max(0, FER)}{K_{FER}^{DIA}}, 1 \right). \quad (52)$$

Observations in the Southern Ocean show a high  $\left(\frac{Si}{C}\right)_{DIA}$  ratio in areas with very high Si concentration so  $\left(\frac{Si}{C}\right)_{DIA}$  is arbitrarily increased throughout the ocean to reflect this:

$$\left(\frac{Si}{C}\right)_{DIA} = \frac{6. * SIL}{SIL + K_{BSI}}. \quad (53)$$

$\left(\frac{Si}{C}\right)_{DIA}$  is set to the higher of these two ratios.  
 $SIL_{dep}$  is described in 8.5 and  $SIL_{riv}$  in 8.6.

Table 14: List of parameters and variables used to calculate the evolution of silica

| Term                 | Variable  | Description                                              | Defined in                    |
|----------------------|-----------|----------------------------------------------------------|-------------------------------|
| $\beta_{Si}$         | siremin   | remineration rate of silica                              | <i>bgcsmk.F90</i>             |
| $\mu_{DIA}$          | prophy    | primary production of diatoms                            | <i>bgcpro.F90, bgcnul.F90</i> |
| $\frac{Si}{C}_{DIA}$ | silfac    | Si/C ratio of diatoms                                    | <i>bgcpro.F90</i>             |
| $K_{FER}^{DIA}$      | rn_kmfphy | half saturation constant of Fe                           | <i>namelist.trc.sms</i>       |
| $K_{BSI}$            | rn_kmsbsi | half saturation constant for $\left(\frac{Si}{C}\right)$ | <i>namelist.trc.sms</i>       |
| $SIL_{riv}$          | depsil    | river input of $SiO_3$                                   | <i>trcini.dgom.F90</i>        |
| $SIL_{atm}$          | sidep     | input of atmospheric silica to the water column          | <i>bgbio.F90</i>              |

### 6.2.2 Biogenic particulate silica - BSI

The temporal evolution of biogenic silica is calculated as:

$$\begin{aligned} \frac{\partial BSI}{\partial t} = & \underbrace{0.15 \min \left( 1, \frac{SIL}{K_{SIL}} \right) \left( \frac{Si}{C} \right)_{DIA} \mu^{DIA}_{DIA}}_{production} \\ & - \underbrace{\sum_j g_{DIA}^{Z_j} * Z_j * DIA \frac{BSI}{DIA}}_{grazing} - \underbrace{\delta_{DIA} \mu_0^{DIA} b^T \frac{BSI}{DIA}}_{loss} \end{aligned} \quad (54)$$

where  $\delta^{DIA}$  is the excretion ratio for diatoms and  $\left(\frac{Si}{C}\right)_{DIA}$  is described above.

### 6.2.3 Sinking particulate silica - DSI

The temporal evolution of sinking particulate silica is calculated as:

$$\begin{aligned} \frac{\partial DSI}{\partial t} = & \underbrace{\delta_{DIA} \mu_0^{DIA} b^T \frac{BSI}{DIA}}_{loss} - \underbrace{\beta_{Si} DSI}_{dissolution} \\ & + \underbrace{\sum_j g_{DIA}^{Z_j} * Z_j * DIA \frac{BSI}{DIA}}_{grazing} + \underbrace{V_{sink} \frac{\partial DSI}{\partial z}}_{sinking DSI} \end{aligned} \quad (55)$$

where  $\delta^{DIA}$  is the excretion ratio for diatoms as above.

### 6.3 Phosphorus and Nitrogen - PO<sub>4</sub> and DIN

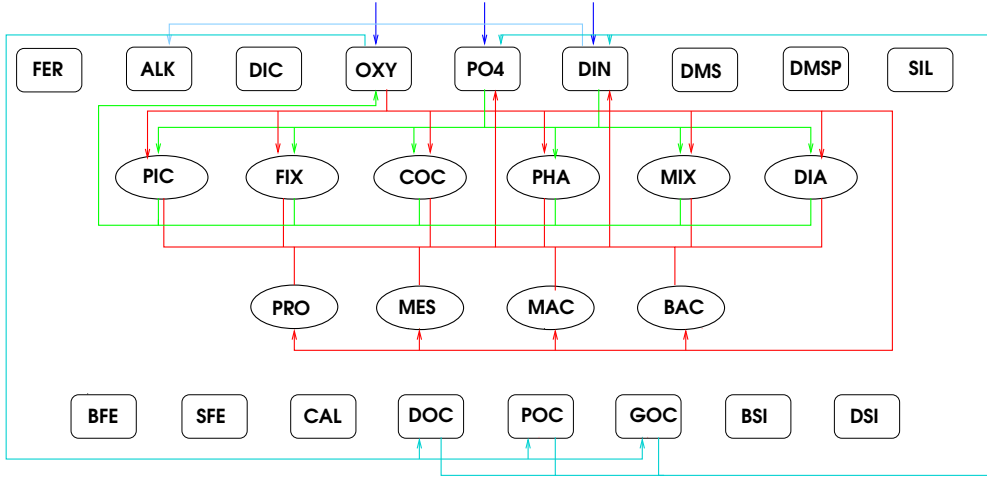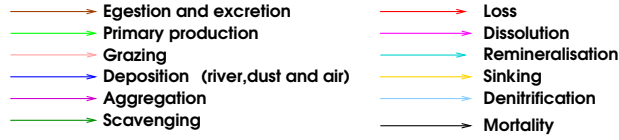

Figure 7: The source and sinks for phosphate (PO<sub>4</sub>), nitrogen (DIN) and oxygen (OXY).

Phosphate is input to the ocean by river deposition; it is consumed during phytoplankton growth and produced during respiration.

$$\frac{\partial PO_4}{\partial t} = \underbrace{\sum -\mu^{P_i} P_i (1 + \nu_{P_i}^{tot})}_{production} + \underbrace{consum}_{consumption} + \underbrace{PO_{4riv}}_{river\ input} \quad (56)$$

$consum$  is defined in equation 34.

Dissolved inorganic nitrogen evolves as:

$$\begin{aligned} \frac{\partial DIN}{\partial t} = & \underbrace{\sum -\mu^{P_i} P_i (1 + \nu_{P_i}^{tot}) \frac{N}{C} DIN_{nit}}_{production} + \underbrace{consum * \frac{N}{C}}_{consumption} \\ & - \underbrace{N_{denit}}_{denitrification} + \underbrace{DIN_{riv} \frac{N}{C}}_{river\ input} + \underbrace{DIN_{atm}}_{atmosphere\ deposition} \end{aligned} \quad (57)$$

where

$$N_{denit} = 0.8 \left( \frac{O}{C} * consum * resp_{BAC}^{NO_3} \right). \quad (58)$$

$\frac{O}{C} = \frac{172}{122}$  and  $resp_{BAC}^{NO_3}$  is the fraction of bacterial respiration that uses NO<sub>3</sub> rather than O<sub>2</sub> and is described in Section 6.4.  $DIN_{nit}$  is 1 for all phytoplankton type except for N<sub>2</sub> fixers for which it represents the nitrate limited fraction of growth on NO<sub>3</sub> rather than N<sub>2</sub>:

$$DIN_{nit} = \frac{\frac{DIN}{DIN+K_{NO_3}^{fix}}}{\frac{DIN}{DIN+K_{NO_3}^{fix}} + R_{fix} \left(1 - \frac{DIN}{DIN+K_{NO_3}^{fix}}\right)}. \quad (59)$$

Table 15: List of Parameters used in the evolution of phosphate and nitrogen

| Term                | Variable  | Description                                                                                  | Defined in              |
|---------------------|-----------|----------------------------------------------------------------------------------------------|-------------------------|
| $N_{denit}$         | denitr    | denitrification                                                                              | <i>bgcbio.F90</i>       |
| $PO_{4riv}$         | deppo4    | River input of phosphate in mole                                                             | <i>trcini.dgom</i>      |
| $DIN_{riv}$         | depnit    | River input of NO <sub>3</sub>                                                               | <i>trcini.dgom</i>      |
| $DIN_{atm}$         | atmdin    | Atmosphere input of NO <sub>3</sub>                                                          | <i>trcini.dgom</i>      |
| $K_{DIN}^{FIX}$     | rn_kmnphy | NO <sub>3</sub> half saturation constants for phytoplankton                                  | <i>namelist.trc.sms</i> |
| $R_{FIX}$           | rn_munfix | Fraction of growth rate during N <sub>2</sub> fixation relative to growth on NO <sub>3</sub> | <i>namelist.trc.sms</i> |
| $DIN_{nit}$         | dinpft    | fraction of phyto growth that is supported by NO <sub>3</sub> rather than N <sub>2</sub>     | <i>bgcpro.F90</i>       |
| $resp_{BAC}^{NO_3}$ | nitrfac   | fraction of bacterial respiration using NO <sub>3</sub> rather than O <sub>2</sub>           | <i>bgcnul.F90</i>       |

## 6.4 Oxygen - OXY

Oxygen is produced during the growth of phytoplankton. It is consumed during the growth of N<sub>2</sub> fixers on N<sub>2</sub> and during the remineralisation described by the term *consum* in Section 5.2. There is also an exchange of oxygen with the atmosphere.

$$\begin{aligned} \frac{\partial OXY}{\partial t} = & \underbrace{\frac{O}{C} \sum \mu^{P_i} P_i (1 + \nu_{P_i}^{tot})}_{\text{phytoplankton growth}} - \underbrace{\frac{N}{C} \mu^{P_{fix}} P_{fix} (1 + \nu_{FIX}^{tot}) 1.25(1 - DIN_{nit})}_{\text{growth of } N_2 \text{ fixers on } N_2} \\ & - \underbrace{\frac{O}{C} \text{consum}(1 - resp_{BAC}^{NO_3})}_{\text{remineralisation}} + \underbrace{F_{air-sea}^{O_2}}_{\text{O}_2 \text{ flux from air to sea}} \end{aligned} \quad (60)$$

The fraction of bacterial respiration that uses NO<sub>3</sub> rather than O<sub>2</sub>,  $resp_{BAC}^{NO_3}$  is given by:

$$resp_{BAC}^{NO_3} = \frac{\sin\left(\max\left(-.5, \frac{10E-6-OXY}{20E-6+OXY}\right) * \pi\right) + 1}{2} \quad (61)$$

The air-sea exchange of oxygen,  $F_{air-sea}^{O_2}$ , is given by

$$F_{air-sea}^{O_2} = \left(\frac{O}{N_{pi}} sol_{O_2} \left(1 - e^{20.1050 - 0.0097982 * sstk - 6163.10 / sstk}\right) - OXY\right) .3v^2(1 - \gamma) \quad (62)$$

The terms are described described in Section 7. It is calculated in *bgcflx*.

## 7 Air-sea exchange of trace gases

The air-sea flux of trace gases (CO<sub>2</sub>, O<sub>2</sub>, and DMS) is given by the product of gas exchange coefficient and the difference in concentration of the gas across the sea-air interface:

$$F_{air-sea} = k_w * (1 - \gamma) * (pC_{gas}^{air} - pC_{gas}^{sea}) \quad (63)$$

where  $k_w$  is the gas exchange coefficient,  $\gamma$  is the fraction of the ocean covered by ice,  $pC_{gas}^{air}$  is the concentration of the gas in the air directly above the water, and  $pC_{gas}^{sea}$  is the sea surface concentration of the gas.

The gas exchange coefficient is calculated according to Wanninkhof (1992) (eq. 3):

$$k_{wannin} = 0.3 * v^2 * \sqrt{660./Schmidt_{gas}} \quad (64)$$

where  $v$  is the amplitude of the winds (m/s),  $sst$  is the sea surface temperature, and  $Schmidt_{gas}$  is the Schmidt number for each gas Wanninkhof (1992).

## 7.1 CO<sub>2</sub>

For the gas exchange coefficient CO<sub>2</sub> Wanninkhof (1992) include a chemical enhancement term:

$$k_{wannin}^{CO_2} = 0.3 * v^2 + 2.5 * (0.5246 + 0.016256 * sst + 0.00049946 * sst^2) \quad (65)$$

For CO<sub>2</sub>,  $pC_{CO_2}^{air}$  is calculated from the measured mixing ratio of CO<sub>2</sub> in the atmosphere ( $C_{CO_2}^{air}$ , in ppm) times the solubility of CO<sub>2</sub> in sea water and corrected for 100% water vapor Sarmiento et al. (1992):

$$pC_{CO_2}^{air} = C_{CO_2}^{air} * sol_{CO_2} * (1. - e^{20.1050 - 0.0097982 * sst - 6163.10 / sst}) \quad (66)$$

where  $sst$  is sea surface temperature in degree Kelvin. The solubility of CO<sub>2</sub> is given by:

$$sol_{CO_2} = e^{c00 + c01 / (sst * .01) + c02 * \ln(sst * .01) + sal * (c03 + c04 * qtt + c05 * (sst * .01)^2)} * smicr \quad (67)$$

where  $sal$  is the salinity and the coefficients  $c00$ ,  $c01$ ,  $c02$ ,  $c03$ ,  $c04$ ,  $c05$  and  $smicr$  are given by Wanninkhof (1992). The Schmidt number for CO<sub>2</sub> is given by:

$$Schmidt_{CO_2} = 2073.1 - 125.62 * sst + 3.6276 * sst^2 - 0.043126 * sst^3 \quad (68)$$

$C_{CO_2}^{sea}$  is the concentration of CO<sub>2</sub> in the model, calculated based on the state variables DIC and TALK.

## 7.2 O<sub>2</sub>

For O<sub>2</sub>,  $pC_{O_2}^{air}$  is calculated from the measured mixing ratio of O<sub>2</sub> in the atmosphere ( $C_{O_2}^{air}$ , times the solubility of O<sub>2</sub> in seawater, also corrected for 100% water vapor as for CO<sub>2</sub> Sarmiento et al. (1992):

$$pC_{O_2}^{air} = C_{O_2}^{air} * sol_{O_2} * (1. - e^{20.1050 - 0.0097982 * sst - 6163.10 / sst}) \quad (69)$$

The solubility of O<sub>2</sub> is calculated as follows:

$$sol_{O_2} = e^{ox0 + ox1 / (sst * .01) + ox2 * \ln(sst * .01) + sal * (ox3 + ox4 * (sst * .01) + ox5 * (sst * .01)^2)} * oxyco \quad (70)$$

The Schmidt number for O<sub>2</sub> is given by:

$$Schmidt_{O_2} = 1953.4 - 128.0 * sst + 3.9918 * sst^2 - 0.050091 * sst^3 \quad (71)$$

where  $sal$  is the salinity and the coefficients  $ox0$ ,  $ox1$ ,  $ox2$ ,  $ox3$ ,  $ox4$ ,  $ox5$ , and  $oxyco$  are given by Wanninkhof (1992).

Table 16: List of parameters and variables used to calculate the evolution of air-sea fluxes

| Term                | Variable | Description                                       | Defined in             |
|---------------------|----------|---------------------------------------------------|------------------------|
| $v$                 | wndm     | wind speed                                        |                        |
| $sal$               | sn (1)   | salinity of sea surface layer                     |                        |
| $sst$               | tn (1)   | temperature of sea surface ( $^{\circ}\text{C}$ ) |                        |
| $col$               | c00      | and other chemical constants                      | <i>trcini.dgom.F90</i> |
| $Schmidt_{CO_2}$    | schmico2 | Schmidt number for $\text{CO}_2$                  | <i>bgcflx.F90</i>      |
| $Schmidt_{O_2}$     | schmio2  | Schmidt number for $\text{O}_2$                   | <i>bgcflx.F90</i>      |
| $\gamma$            | freeze   | fraction of ocean covered by ice                  | <i>limflx.F90</i>      |
| $\frac{O}{N}_{pi}$  | atcox    | pre-industrial ratio of oxygen to nitrogen        | <i>trcini.dgom.F90</i> |
| $F_{air-sea}^{O_2}$ | flu16    | air-sea oxygen flux                               | <i>bgcflx.F90</i>      |

## 8 Model Setup

### 8.1 Ocean General Circulation Model

The physical model NEMO v3.1 (Madec (2008), <http://www.nemo-ocean.eu/About-NEMO/Reference-manuals>) was developed by the Laboratoire d’Océanographie Dynamique et de Climatologie (LODYC) to study large scale ocean circulation and its interaction with atmosphere and sea-ice. NEMO is based on the Navier-Stokes equations describing the motions of the fluid and on a non-linear equation of state, which couples the two tracers salinity and temperature to the fluid velocity.

### 8.2 Sea-Ice Model

NEMO is coupled to the Louvain-La-Neuve Sea-Ice Model (LIM, Timmermann et al., 2005), developed by Fichefet and Morales-Maqueda (1999). LIM has been thoroughly validated for both Arctic and Antarctic conditions, and has been used in a wide range of process studies. Due to the use of an elaborate technique for solving the continuity equations (Prather, 1986), LIM is particularly suited to describing the ice-edge in coarse grid resolutions, which are typically used for climate modelling studies. The physical fields that are advected in LIM are the ice concentration, the snow volume per unit area, the ice volume per unit area, the snow enthalpy per unit area, the ice enthalpy per unit area, and the brine reservoir per unit area. A full model description and details of the coupling to OPA-ORCA can be found in Timmermann et al. (2005).

### 8.3 Forcing

#### 8.3.1 Physical Forcing

The model is forced by daily wind stress, cloud cover and precipitation from the NCEP/NCAR reanalysed fields (Kalnay et al., 1996). Sensible and latent heat fluxes are calculated with bulk formulae using the differences between the surface temperature calculated by OPA and the observed air temperature, taking into account local humidity. At the end of each year a water balance is calculated and a uniform water flux correction is applied during the following year to conserve the water mass.

### 8.4 Initialisation

All model simulations are initialized with observations from the World Ocean Atlas 2009 for temperature (Locarnini et al., 2010), salinity (Antonov et al., 2010)  $\text{PO}_4^{3-}$ ,  $\text{NO}_3^-$ ,  $\text{SiO}_3^-$ , (Garcia et al., 2010b) and  $\text{O}_2$  (Garcia et al., 2010a). DIC, alkalinity (GLODAP) observations were from Key et al. (2004). The biological state variables are initialised with the output from previous model runs.

### 8.5 Dust input

The model is forced with Fe and Si input from monthly dust fluxes taken from Jickells et al. (2005) and interpolated to daily values in *bgcint.F90*. The input is total dust rather than in units of Fe. We assume



0.035g Fe per g of dust and either 8.8g Si per g Fe or, the equivalent, 0.308 g Si per g dust. The solubility of Fe in dust is generally taken to be 2 % and may be set in `rn_fersol`. The solubility of Si in dust is 7.5 %. Using these values the dust is converted to equivalent Fe,  $Fe_{dep}$  and Si,  $Si_{dep}$  in units of mol/L/timestep in `bgcbio.F90`.

## 8.6 River input

Annual fluxes of riverine carbon and nutrient (N, Si, Fe) to the ocean were computed following a global river drainage direction map (DDM30), considering population and basin area (Döll and Lehner, 2002), and river runoff (Kourzoun, 1977; Ludwig and Probst, 1998) at  $0.5^\circ$  increments of latitude and longitude as in da Cunha et al. (2007). This map represents the drainage directions of surface water on all continents, except Antarctica. Cells of the map are connected by their drainage directions and are thus organized into drainage basins. We use the cells corresponding to basin outlets to the ocean as input data for PlankTOM.

Values for  $DIC_{riv}$ ,  $DOC_{riv}$ ,  $POC_{riv}$ ,  $DIN_{riv}$ ,  $PO4_{riv}$ ,  $SIL_{riv}$  and  $Fe_{riv}$  as used in the preceding Sections are obtained by multiplying the input by the relevant parameter in Table 17. Thus all riverine inputs may be switched off by setting their parameter to zero.

In order to close the N, Si, and alkalinity cycles of the ocean, as much POM, DOM, SiO<sub>2</sub> and CaCO<sub>3</sub> is removed from the bottom water layer as is added by rivers and Si in dust.

### 8.6.1 Dissolved Inorganic Nitrogen (DIN)

To calculate riverine DIN inputs we used a regression model originally developed by Smith et al. (2003):

$$\log DIN = 3.99 + 0.35 \log POP + 0.75 \log R \quad (72)$$

where (DIN) is in mol N km<sup>-2</sup> y<sup>-1</sup>, (POP) is population density in people km<sup>-2</sup>, and (R) is runoff in m y<sup>-1</sup>. The model describes DIN export by the analysis of 165 systems for which DIN flux data is available (Meybeck and A., 1997), S. Smith and F. Wulff (Eds.), LOICZ-Biogeochemical modelling node, 2000, available at <http://data.ecology.su.se/MNODE/>. In this model, riverine DIN export to the coastal zone is a function of basin population density and runoff: On the basis of basin area, basin population (for the year 1990) and runoff provided by the DDM30 map, 16.3 Tg DIN y<sup>-1</sup> (1.16 Tmol N y<sup>-1</sup>) are transported to the coastal zone by rivers. In the Smith et al. 2003 model, the average N:P ratio of riverine export is 18:1, which is close to the PISCES-T N:P ratio of 16:1. Nitrogen retention in estuarine areas was not included owing to lack of global data.

### 8.6.2 Dissolved Silica (Si)

Rivers are responsible for 80% of the inputs of Si to the ocean (Treguer et al., 1995). For an estimate of riverine input of dissolved Si we used the runoff data from the DDM30 map, and applied an average concentration of Si in river waters of 4.2 mg Si/L (Treguer et al., 1995). Si concentration in river water is variable according to basin geology but regional data is not available. Our estimate leads to a dissolved Si river input of 187 Tg Si y<sup>-1</sup> to the ocean. This value is comparable to the range of  $140 \pm 30$  Tg Si y<sup>-1</sup> for a net riverine dissolved Si input to the ocean proposed by Treguer et al. (1995), considering estuarine retention of Si.

### 8.6.3 Dissolved Iron (Fe)

Rivers and continental shelf sediments supply Fe to surface waters. Because it is extensively removed from the dissolved phase in estuaries, rivers are thought to be a minor source for the open ocean, but not for coastal zones. We used the runoff data from the DDM30 map and applied an average concentration of dissolved Fe in river waters of 40 mg L<sup>-1</sup> (Martin and Meybeck, 1979; Martin and Whitfield, 1983). As for Si, river basin geology influences Fe concentration in river water, but there is no available global database on riverine Fe. Our estimate leads to a gross dissolved Fe input of 1.75 Tg Fe y<sup>-1</sup>, comparable to the estimate of 1.45 Tg Fe y<sup>-1</sup> by Chester (1990). During estuarine mixing, flocculation of colloidal Fe and organic matter forms particulate Fe because of the major change in ionic strength upon mixing of fresh water and seawater (de Baar and Jong, 2001). This removal has been well documented in many estuaries. Literature values show that approximately 80 to 99% of the gross dissolved Fe input is lost to the particulate phase in estuaries at low salinities (Boyle et al., 1977; Chester, 1990; Dai and Martin, 1995; Lohan and Bruland,

2006; Sholkovitz, 1978). We apply a removal rate of 99% to our gross Fe flux, and obtained a net input of riverine dissolved Fe to the coastal ocean of  $0.02 \text{ Tg Fe y}^{-1}$ .

#### 8.6.4 Particulate (POC) and Dissolved Organic (DOC) and Inorganic (DIC) Carbon

The predicted river carbon fluxes are based on models relating river carbon fluxes to their major controlling factors (Ludwig and Probst, 1998; Ludwig, 1996). For POC, sediment flux is the dominant controlling parameter. For DOC, runoff intensity, basin slope, and the amount of soil OC in the basin are the controlling parameters (Ludwig, 1996). We applied this model to the DDM30 data set, and we estimate a gross discharge of  $148 \text{ Tg C y}^{-1}$  and  $189 \text{ Tg C y}^{-1}$  for POC and DOC, respectively. We assume that DOC has a conservative behavior in estuaries. These values are in agreement with recent modeled values of  $170 \text{ Tg C y}^{-1}$  as DOC (Harrison et al., 2005), and  $197 \text{ Tg C y}^{-1}$  as POC (Beusen et al., 2005; Seitzinger et al., 2005). We used a C:N:P:Fe ratio of 122:16:1:2.44  $10^{-4}$ , thus riverine DOC and POC, when they are remineralized, are also N, P and Fe sources to the ocean. Inorganic carbon is mainly transported by rivers in the dissolved form. For DIC inputs, drainage intensity and river basin lithology are the controlling parameters (Ludwig et al., 1996). We applied this model to the DDM30 data set, and we estimate a DIC and alkalinity discharge of  $385 \text{ Tg C y}^{-1}$  ( $32.12 \text{ Tmol C y}^{-1}$ ).

Table 17: List of Parameters used in river input

| Term | Variable  | Description              | Defined in              |
|------|-----------|--------------------------|-------------------------|
|      | rn_rivdic | river input of DIC       | <i>namelist.trc.sms</i> |
|      | rn_rivdoc | river input of DOC       | <i>namelist.trc.sms</i> |
|      | rn_rivfer | river input of Fe        | <i>namelist.trc.sms</i> |
|      | rn_rivpoc | river input of POC       | <i>namelist.trc.sms</i> |
|      | rn_rivnit | river input of nitrate   | <i>namelist.trc.sms</i> |
|      | rn_rivpo4 | river input of phosphate | <i>namelist.trc.sms</i> |
|      | rn_rivsil | river input of silica    | <i>namelist.trc.sms</i> |
|      | rn_sedfer | coastal release of Fe    | <i>namelist.trc.sms</i> |

## 8.7 The namelist.trc.sms file

Values used for the parameters defined in *namelist.trc.sms* are given in the following tables.

Table 18: List of Parameters defined in *namelist.trc.sms*

| Parameter   | Value  | Units                                | Description                                                     |
|-------------|--------|--------------------------------------|-----------------------------------------------------------------|
| rn_ag1poc   | 1.2e4  | $L s (mol d)^{-1} m^{-2}$            | small POC ( $POC_s$ aggregation)                                |
| rn_ag2poc   | 1e4    | $L s (mol d)^{-1} m^{-2}$            | $POC_s$ - large POC ( $POC_l$ ) aggregation                     |
| rn_ag3poc   | 140    | $L (mol d)^{-1}$                     | $POC_s$ - $POC_l$ aggregation                                   |
| rn_ag4poc   | 150    | $L (mol d)^{-1}$                     | $POC_s$ aggregation                                             |
| rn_ag5doc   | 180    | $L s (mol d)^{-1} m^{-2}$            | DOC - $POC_s$ aggregation                                       |
| rn_ag6doc   | 3.9e3  | $L s (mol d)^{-1} m^{-2}$            | DOC - $POC_l$ aggregation                                       |
| rn_alpphy   | 1.e-6  | $mol C m^2 (g Chl mol photons)^{-1}$ | initial slope of photosyntheses vs light intensity curve        |
| rn_coccal   | 0.433  | -                                    | ratio of $CaCO_3$ to organic carbon                             |
| rn_domphy   | 0.45   | -                                    | maximum DOC excretion ratio for all phyto                       |
| rn_discal   | 0.75   | -                                    | fraction of $CaCO_3$ dissolved during coccolithophore mortality |
| rn_docphy   | 0.05   | -                                    | excretion ratio for all phyto                                   |
| rn_ekwgrn   | 0.0232 | $m^{-1}$                             | green light absorption coefficient of $H_2O$                    |
| rn_ekwred   | 0.225  | $m^{-1}$                             | red light absorption coefficient of $H_2O$                      |
| rn_etomax   | 80.    | $W m^{-2}$                           | maximum surface insolation                                      |
| rn_faco18   | 0.98   | -                                    | bacterial fractionation for $O_{18}$                            |
| rn_fersol   | 0.01   | -                                    | solubility of iron in dust                                      |
| rn_gbadoc   | 0.088  | -                                    | relative preference of BAC grazing for DOC                      |
| rn_gbagoc   | 8.76   | -                                    | relative preference of BAC grazing for GOC                      |
| rn_gbapoc   | 8.76   | -                                    | relative preference of BAC grazing for POC                      |
| rn_ggebac   | .21    | -                                    | growth efficiency BAC                                           |
| rn_ggemac   | 0.3    | -                                    | growth efficiency MAC                                           |
| rn_ggemes   | 0.25   | -                                    | growth efficiency MES                                           |
| rn_ggemic   | 0.29   | -                                    | growth efficiency PRO                                           |
| rn_gmabac   | 0.186  | -                                    | relative preference of MAC grazing for BAC                      |
| rn_gmagoc   | 0.186  | -                                    | relative preference of MAC grazing for GOC                      |
| rn_gmames   | 1.860  | -                                    | relative preference of MAC grazing for MES                      |
| rn_gmamimic | 1.860  | -                                    | relative preference of MAC grazing for PRO                      |
| rn_gmaphy   | 1.860  | -                                    | relative preference of MAC for DIA                              |
|             | 1.860  | -                                    | relative preference of MAC for MIX                              |
|             | 1.860  | -                                    | relative preference of MAC for COC                              |
|             | .930   | -                                    | relative preference of MAC for PIC                              |
|             | 1.860  | -                                    | relative preference of MAC for PHA                              |
|             | .186   | -                                    | relative preference of MAC for FIX                              |
| rn_gmapoc   | 0.186  | -                                    | relative preference of MES grazing for POC                      |
| rn_gmebac   | .165   | -                                    | relative preference of MES grazing for BAC                      |
| rn_gmegoc   | 0.165  | -                                    | relative preference of MES grazing for GOC                      |
| rn_gmemic   | 3.302  | -                                    | relative preference of MES grazing for PRO                      |
| rn_gmephy   | 1.651  | -                                    | relative preference of MES for DIA                              |
|             | 1.238  | -                                    | relative preference of MES for MIX                              |
|             | 1.238  | -                                    | relative preference of MES for COC                              |
|             | 1.238  | -                                    | relative preference of MES for PIC                              |
|             | 1.238  | -                                    | relative preference of MES for PHA                              |
|             | 0.165  | -                                    | relative preference of MES for FIX                              |
| rn_gmepoc   | 0.165  | -                                    | relative preference of MES grazing for POC                      |
| rn_gmibac   | 2.480  | -                                    | relative preference of PRO grazing for BAC                      |
| rn_gmigoc   | 0.062  | -                                    | relative preference of PRO grazing for GOC                      |
| rn_gmiphy   | 0.620  | -                                    | relative preference of MIC for DIA                              |
|             | 1.240  | -                                    | relative preference of MIC for MIX                              |

Continued on next page

Table 18 – continued from previous page

| Parameter | Value    | Units                     | Description                                                |
|-----------|----------|---------------------------|------------------------------------------------------------|
|           | 1.240    | -                         | relative preference of MIC for COC                         |
|           | 1.240    | -                         | relative preference of MIC for PIC                         |
|           | 1.240    | -                         | relative preference of MIC for PHA                         |
|           | 1.240    | -                         | relative preference of MIC for FIX                         |
| rn_gmipoc | 0.062    | -                         | relative preference of PRO grazing for POC                 |
| rn_grabac | 3.15     | d <sup>-1</sup>           | maximum BAC uptake rate                                    |
| rn_gramac | 0.106    | d <sup>-1</sup>           | maximum MAC grazing rate                                   |
| rn_grames | 1.22     | d <sup>-1</sup>           | maximum MES grazing rate                                   |
| rn_gramic | 1.59     | d <sup>-1</sup>           | maximum PRO grazing rate                                   |
| rn_grkmac | 9.e-6    | mol L <sup>-1</sup>       | K <sub>m</sub> for MAC grazing                             |
| rn_grkmes | 10.e-6   | mol L <sup>-1</sup>       | K <sub>m</sub> for MES grazing                             |
| rn_grkmic | 10.e-6   | mol L <sup>-1</sup>       | K <sub>m</sub> for PRO grazing                             |
| rn_icemac | 100.0    | %                         | MAC enhanced recruitment under ice                         |
| rn_kgrphy | .0118    | L (m g Chl) <sup>-1</sup> | light absorption in blue-green for DIA                     |
|           | .0257    | L (m g Chl) <sup>-1</sup> | light absorption in blue-green for MIX                     |
|           | .0257    | L (m g Chl) <sup>-1</sup> | light absorption in blue-green for COC                     |
|           | .0696    | L (m g Chl) <sup>-1</sup> | light absorption in blue-green for PIC                     |
|           | .0257    | L (m g Chl) <sup>-1</sup> | light absorption in blue-green for PHA                     |
|           | .0657    | L (m g Chl) <sup>-1</sup> | light absorption in blue-green for FIX                     |
| rn_kmfbac | 0.025e-9 | mol L <sup>-1</sup>       | K <sub>m</sub> for Fe in DOC remineralisation by bacteria  |
| rn_kmfphy | 40.e-9   | mol L <sup>-1</sup>       | K <sub>m</sub> <sup>Fe</sup> for DIA                       |
|           | 25.e-9   | mol L <sup>-1</sup>       | K <sub>m</sub> <sup>Fe</sup> for MIX                       |
|           | 25.e-9   | mol L <sup>-1</sup>       | K <sub>m</sub> <sup>Fe</sup> for COC                       |
|           | 10.e-9   | mol L <sup>-1</sup>       | K <sub>m</sub> <sup>Fe</sup> for PIC                       |
|           | 25.e-9   | mol L <sup>-1</sup>       | K <sub>m</sub> <sup>Fe</sup> for PHA                       |
|           | 40.e-9   | mol L <sup>-1</sup>       | K <sub>m</sub> <sup>Fe</sup> for FIX                       |
| rn_kmnphy | 2.e-6    | mol L <sup>-1</sup>       | K <sub>m</sub> <sup>N</sup> for DIA                        |
|           | 2.0e-6   | mol L <sup>-1</sup>       | K <sub>m</sub> <sup>N</sup> for MIX                        |
|           | 2.0e-6   | mol L <sup>-1</sup>       | K <sub>m</sub> <sup>N</sup> for COC                        |
|           | 2.0e-6   | mol L <sup>-1</sup>       | K <sub>m</sub> <sup>N</sup> for DIA                        |
|           | 3.0e-6   | mol L <sup>-1</sup>       | K <sub>m</sub> <sup>N</sup> for MIX                        |
|           | 13.0e-6  | mol L <sup>-1</sup>       | K <sub>m</sub> <sup>N</sup> for COC                        |
| rn_kmobac | 1e-7     | mol L <sup>-1</sup>       | K <sub>m</sub> for DOC in DOC remineralisation by bacteria |
| rn_kmpbac | 1e-7     | mol L <sup>-1</sup>       | K <sub>m</sub> for PO <sub>4</sub>                         |
| rn_kmpphy | 7.6e-6   | mol L <sup>-1</sup>       | K <sub>m</sub> <sup>PO<sub>4</sub></sup> for DIA           |
|           | 12.2e-6  | mol L <sup>-1</sup>       | K <sub>m</sub> <sup>PO<sub>4</sub></sup> for MIX           |
|           | 15.9e-6  | mol L <sup>-1</sup>       | K <sub>m</sub> <sup>PO<sub>4</sub></sup> for COC           |
|           | 15.9e-6  | mol L <sup>-1</sup>       | K <sub>m</sub> <sup>PO<sub>4</sub></sup> for PIC           |
|           | 97.6e-6  | mol L <sup>-1</sup>       | K <sub>m</sub> <sup>PO<sub>4</sub></sup> for PHA           |
|           | 24.4e-6  | mol L <sup>-1</sup>       | K <sub>m</sub> <sup>PO<sub>4</sub></sup> for FIX           |
| rn_kmsbsi | 20e-6    | mol L <sup>-1</sup>       | K <sub>m</sub> for the Si/C ratio of DIA                   |
| rn_krdphy | .0056    | L (m g Chl) <sup>-1</sup> | light absorption in red for DIA                            |
|           | .0098    | L (m g Chl) <sup>-1</sup> | light absorption in red for MIX                            |
|           | .0098    | L (m g Chl) <sup>-1</sup> | light absorption in red for COC                            |
|           | .0197    | L (m g Chl) <sup>-1</sup> | light absorption in red for PIC                            |
|           | .0098    | L (m g Chl) <sup>-1</sup> | light absorption in red for PHA                            |
|           | .0181    | L (m g Chl) <sup>-1</sup> | light absorption in red for FIX                            |
| rn_lyscal | 10e-5    | mol L <sup>-1</sup>       | inertia conc. for CaCO <sub>3</sub> dissolution            |
| rn_mormac | 0.020    | d <sup>-1</sup>           | MAC mortality rate                                         |
| rn_mormes | 0.040    | d <sup>-1</sup>           | MES mortality rate                                         |
| rn_motmac | 1.0481   | -                         | temp. dependence of MAC mortality                          |
| rn_motmes | 1.1161   | -                         | temp. dependence of MES mortality                          |
| rn_mumpft | 0.44     | d <sup>-1</sup>           | maximum growth rate DIA                                    |
|           | 0.35     | d <sup>-1</sup>           | maximum growth rate MIX                                    |

Continued on next page

Table 18 – continued from previous page

| Parameter              | Value  | Units                                                  | Description                                                                         |
|------------------------|--------|--------------------------------------------------------|-------------------------------------------------------------------------------------|
| rn_munfix<br>rn_mutpft | 0.70   | d <sup>-1</sup>                                        | maximum growth rate COC                                                             |
|                        | 0.26   | d <sup>-1</sup>                                        | maximum growth rate PIC                                                             |
|                        | 0.68   | d <sup>-1</sup>                                        | maximum growth rate PHA                                                             |
|                        | 0.046  | d <sup>-1</sup>                                        | maximum growth rate FIX                                                             |
|                        | 0.56   | -                                                      | Fraction of growth rate during N2fix relative to growth on NO3                      |
|                        | 1.0400 | -                                                      | temp. dependence of proto-zooplankton                                               |
|                        | 1.0242 | -                                                      | temp. dependence of meso-zooplankton                                                |
|                        | 1.1165 | -                                                      | temp. dependence of macro-zooplankton                                               |
|                        | 1.0680 | -                                                      | temp. dependence of DIA                                                             |
|                        | 1.0461 | -                                                      | temp. dependence of MIX                                                             |
|                        | 1.0132 | -                                                      | temp. dependence of COC                                                             |
|                        | 1.0611 | -                                                      | temp. dependence of PIC                                                             |
|                        | 1.0520 | -                                                      | temp. dependence of PHA                                                             |
|                        | 1.0623 | -                                                      | temp. dependence of FIX                                                             |
|                        | 1.0379 | -                                                      | temp. dependence of BAC                                                             |
| rn_qmaphy              | 2.e-7  | -                                                      | maximum quota for Fe for all phyto                                                  |
| rn_qmiphy              | 4.0e-6 | -                                                      | minimum quota for Fe for all phyto                                                  |
| rn_qopphy              | 8.6e-6 | -                                                      | optimal quota for Fe for all phyto                                                  |
| rn_resbac              | 0.10   | d <sup>-1</sup>                                        | BAC respiration at 0°C                                                              |
| rn_resmac              | 0.018  | d <sup>-1</sup>                                        | MAC respiration at 0°C                                                              |
| rn_resmes              | 0.028  | d <sup>-1</sup>                                        | MES respiration at 0°C                                                              |
| rn_resmic              | 0.010  | d <sup>-1</sup>                                        | PRO respiration at 0°C                                                              |
| rn_resphy              | 0.012  | -                                                      | fractional phytoplankton loss rate: DIA                                             |
|                        | 0.15   | -                                                      | fractional phytoplankton loss rate: MIX                                             |
|                        | 0.15   | -                                                      | fractional phytoplankton loss rate: COC                                             |
|                        | 0.15   | -                                                      | fractional phytoplankton loss rate: PIC                                             |
|                        | 0.15   | -                                                      | fractional phytoplankton loss rate: PHA                                             |
|                        | 0.15   | -                                                      | fractional phytoplankton loss rate: FIX                                             |
| rn_retbac              | 1.0494 | -                                                      | temp. dependence of BAC respiration                                                 |
| rn_retmac              | 1.0942 | -                                                      | temp. dependence of MAC respiration                                                 |
| rn_retmes              | 1.0887 | -                                                      | temp. dependence of MES respiration                                                 |
| rn_retmic              | 1.0897 | -                                                      | temp. dependence of PRO respiration                                                 |
| rn_rhfphy              | 29.    | -                                                      | maximum/minimum Fe uptake rate                                                      |
| rn_rivdic              | 1.     | -                                                      | (1 - estuarine retention fraction) of river DIC                                     |
| rn_rivdoc              | 1.     | -                                                      | (1 - estuarine retention fraction) of river DOC                                     |
| rn_rivpoc              | 0.55   | -                                                      | (1 - estuarine retention fraction) of river POC                                     |
| rn_rivpo4              | 1.     | -                                                      | (1 - estuarine retention fraction) of river PO <sub>4</sub>                         |
| rn_rivsil              | 1.     | -                                                      | (1 - estuarine retention fraction) of river SIL                                     |
| rn_rivfer              | 0.25   | -                                                      | (1 - estuarine retention fraction) of river FER                                     |
| rn_scofer              | 1.e-3  | (mol L <sup>-1</sup> ) <sup>-0.6</sup> d <sup>-1</sup> | scavenging of Fe                                                                    |
| rn_scmfer              | 1.e-3  | (mol L <sup>-1</sup> ) <sup>-0.6</sup> d <sup>-1</sup> | minimum scavenging of Fe                                                            |
| rn_sedfer              | 1e-11  | mol L <sup>-1</sup>                                    | coastal release of Fe                                                               |
| rn_sigmac              | 0.70   | -                                                      | fraction of MAC excretion as PO <sub>4</sub>                                        |
| rn_sigmes              | 0.68   | -                                                      | fraction of MES excretion as PO <sub>4</sub>                                        |
| rn_sigmic              | 0.66   | -                                                      | fraction of PRO excretion as DOM                                                    |
| rn_sildia              | .42e-6 | mol L <sup>-1</sup>                                    | K <sub>m</sub> <sup>SiO<sub>3</sub></sup> for diatoms                               |
| rn_singoc              | .0303  | m <sup>2</sup> (kg d) <sup>-1</sup>                    | Sinking rate parameter of POC <sub>l</sub> , CaCO <sub>3</sub> and DSi              |
| rn_sngoc               | .6923  | -                                                      | sinking rate parameter of POC <sub>l</sub> , CaCO <sub>3</sub> and SiO <sub>2</sub> |
| rn_snpoc               | 3.0    | m d <sup>-1</sup>                                      | sinking speed of POC <sub>s</sub>                                                   |
| rn_thmphy              | .7     | g mol <sup>-1</sup>                                    | maximum CHL:C ratio for DIA                                                         |
|                        | .4     | g mol <sup>-1</sup>                                    | maximum CHL:C ratio for MIX                                                         |
|                        | .4     | g mol <sup>-1</sup>                                    | maximum CHL:C ratio for COC                                                         |
|                        | .4     | g mol <sup>-1</sup>                                    | maximum CHL:C ratio for PIC                                                         |
|                        | .5     | g mol <sup>-1</sup>                                    | maximum CHL:C ratio for PHA                                                         |

Continued on next page

**Table 18 – continued from previous page**

| <b>Parameter</b> | <b>Value</b> | <b>Units</b>        | <b>Description</b>                                 |
|------------------|--------------|---------------------|----------------------------------------------------|
|                  | .3           | $\text{g mol}^{-1}$ | maximum CHL:C ratio for FIX                        |
| rn_unamac        | 0.18         | -                   | unassimilated fraction of phyto during MAC grazing |
| rn_unames        | 0.3          | -                   | unassimilated fraction of phyto during MES grazing |
| rn_unamic        | 0.13         | -                   | unassimilated fraction of phyto during PRO grazing |

## References

- Antonov, J. I., Seidov, D., Boyer, T., Locarnini, R., Mishonov, A., Garcia, H., Baranova, O., Zweng, M., and Johnson, D. (2010). *World Ocean Atlas 2009, Volume 2: Salinity*. S. Levitus, Ed. NOAA Atlas NESDIS 69, U.S. Government Printing Office, Washington, D.C.
- Beusen, A., Dekkers, A., Bouwman, A., Ludwig, W., and Harrison, J. (2005). Estimation of global river transport of sediments and associated particulate C, N, and P. *Global Biogeochemical Cycles*, 19(4).
- Boyle, E., Edmond, J., and Sholkovitz, E. (1977). Mechanism of iron removal in estuaries. *Geochimica et Cosmochimica Acta*, 41(9):1313–1324.
- Buitenhuis, E., Hashioka, T., and Quéré, L. (2012). Combined constraints on ocean primary production and phytoplankton biomass from observations and a model. *in prep.*
- Buitenhuis, E., Le Quere, C., Aumont, O., Beaugrand, G., Bunker, A., Hirst, A., Ikeda, T., O'Brien, T., Piontkovski, S., and Straile, D. (2006). Biogeochemical fluxes through mesozooplankton. *Global Biogeochemical Cycles*, 20:GB2003, doi:10.1029/2005GB002511.
- Buitenhuis, E., van der Wal, P., and de Baar, H. J. (2001). Blooms of *emiliana huxleyi* are sinks of atmospheric carbon dioxide: a field and mesocosm study derived simulation. *Global Biogeochemical Cycles*, 15:577–587.
- Buitenhuis, E. T. and Geider, R. (2010). A model of phytoplankton acclimation to iron-light colimitation. *Limnol. Oceanogr*, 55(2):714–724.
- Chester, R. (1990). *Marine Geochemistry*. Unwin Hyman.
- da Cunha, L., Buitenhuis, E. T., Le Quéré, C., Giraud, X., and Ludwig, W. (2007). Potential impact of changes in river nutrient supply on global ocean biogeochemistry. *Global Biogeochemical Cycles*, 21:GB4007, doi:10.1029/2006GB002718.
- Dai, M. and Martin, J. (1995). First data on trace-metal level and behavior in 2 major arctic river-estuarine systems (ob and yenisey) and in the adjacent kara sea, russia. *Earth And Planetary Science Letters*, 131(3-4):127–141.
- de Baar, H. J. W. and Jong, J. T. M. D. (2001). Distributions, sources and sinks of iron in seawater. In Turner, D. R. and Hunter, K. A., editors, *The Biogeochemistry of Iron in Seawater*, pages 123–153. John Wiley.
- Döll, P. and Lehner, B. (2002). Validation of a new global 30-min drainage direction map. *Journal Of Hydrology*, 258(1-4):214–231.
- Fichefet, T. and Morales-Maqueda, M. A. (1999). Modelling the influence of snow accumulation and snow-ice formation on the seasonal cycle of the Antarctic sea-ice cover. *Climate Dynamics*, 15(4):251–268.
- Garcia, H. E., Locarnini, R., Boyer, T., Antonov, J., Baranova, O., Zweng, M., , and Johnson, D. (2010a). *World Ocean Atlas 2009, Volume 3: Dissolved Oxygen, Apparent Oxygen Utilization, and Oxygen Saturation*. S. Levitus, Ed. NOAA Atlas NESDIS 70, U.S. Government Printing Office, Washington, D.C.
- Garcia, H. E., Locarnini, R., Boyer, T., Antonov, J., Zweng, M., Baranova, O., and Johnson, D. (2010b). *World Ocean Atlas 2009, Volume 4: Nutrients (phosphate, nitrate, silicate)*. S. Levitus, Ed. NOAA Atlas NESDIS 71, U.S. Government Printing Office, Washington, D.C.
- Harrison, J., Caraco, N., and Seitzinger, S. (2005). Global patterns and sources of dissolved organic matter export to the coastal zone: Results from a spatially explicit, global model. *Global Biogeochemical Cycles*, 19(4).
- Jickells, T. D., An, Z. S., Andersen, K. K., Baker, A. R., Bergametti, G., Brooks, N., Cao, J. J., Boyd, P. W., Duce, R. A., Hunter, K. A., Kawahata, H., Kubilay, N., laRoche, J., Liss, P., Mahowald, N., Prospero, J. M., Ridgwell, A. J., Tegen, I., and Torres, R. (2005). Global iron connections between desert dust, ocean biogeochemistry, and climate. *Science*, 308:67–71.

- Kalnay, E., Kanamitsu, M., Kistler, R., Collins, W., Deaven, D., Gandin, L., Iredell, M., Saha, S., White, G., Woollen, J., Zhu, Y., Chelliah, M., Ebisuzaki, W., Higgins, W., Janowiak, J., Mo, K. C., Ropelewski, C., Wang, J., Leetmaa, A., Reynolds, R., Jenne, R., and Joseph, D. (1996). The NCEP/NCAR 40-year reanalysis project. *Bulletin of the American Meteorological Society*, 77(3):437–471.
- Key, R., Kozyr, A., Sabine, C., Lee, K., Wanninkhof, R., Bullister, J., Feely, R., Millero, F., Mordy, C., and Peng, T.-H. (2004). A global ocean carbon climatology: Results from glodap. *Global Biogeochemical Cycles*, 18(GB4031).
- Kourzoun, V. I. (1977). *Atlas of World Water Balance*. UNESCO.
- Locarnini, R. A., Mishonov, A., Antonov, J., Boyer, T., Garcia, H., Baranova, O., Zweng, M., and Johnson, D. (2010). *World Ocean Atlas 2009, Volume 1: Temperature*. S. Levitus, Ed. NOAA Atlas NESDIS 68, U.S. Government Printing Office, Washington, D.C.
- Lohan, M. and Bruland, K. (2006). Importance of vertical mixing for additional sources of nitrate and iron to surface waters of the Columbia River plume: Implications for biology. *Marine Chemistry*, 98(2-4):260–273.
- Ludwig, W., e. a. (1996). River discharges of carbon to the world's oceans: Determining local inputs of alkalinity and of dissolved and particulate organic carbon. *Comptes Rendus de l'Academie des Sciences - Serie IIA Sci. Terres Planetes*, 323(12):1007–1014.
- Ludwig, W., Probst, J., and Kempe, S. (1996). Predicting the oceanic input of organic carbon by continental erosion. *Global Biogeochemical Cycles*, 10(1):23–41.
- Ludwig, W. and Probst, J. L. (1998). River sediment discharge to the oceans: Present-day controls and global budgets. *American Journal of Science*, 298:265–295.
- Madec, G. (2008). *NEMO ocean engine Note du pole de modelisation*, volume 27. Institut Pierre-Simon Laplace, Paris.
- Martin, J.-M. and Meybeck, M. (1979). Elemental mass-balance of material carried by major world rivers. *Marine Chemistry*, 7(3):173–206.
- Martin, J.-M. and Whitfield, M. (1983). The significance of the river input of chemical elements to the ocean. In Wong, C., Boyle, E., Bruland, K., and Burton, J.D. and Goldberg, E., editors, *Trace Metals in Sea Water*, pages 265–296. Plenum.
- Meybeck, M. and A., R. (1997). River discharges to the oceans: An assessment of suspended solids, major ions, and nutrients. Technical report, U.N. Environ. Programme.
- Ploug, H., Iversen, M., Koski, M., and Buitenhuis, E. (2008). Production, oxygen respiration rates and sinking velocity of copepod fecal pellets: Direct measurements of ballasting by opal and calcite. *Limnol. Oceanogr.*, 53:469–476.
- Prather, M. C. (1986). Numerical advection by conservation of second-order moments. *Journal of Geophysical Research*, 91(D6):6671–6681.
- Sarmiento, J. L., Orr, J. C., and Siegenthaler, U. (1992). A perturbation simulation of CO<sub>2</sub> uptake in an ocean general-circulation model. *Journal of Geophysical Research-Oceans*, 97(C3):3621–3645.
- Seitzinger, S., Harrison, J., Dumont, E., Beusen, A., and Bouwman, A. (2005). Sources and delivery of carbon, nitrogen, and phosphorus to the coastal zone: An overview of global nutrient export from watersheds (news) models and their application. *Global Biogeochemical Cycles*, 19(4).
- Sholkovitz, E. (1978). Flocculation of dissolved Fe, Mn, Al, Cu, Ni, Co and Cd during estuarine mixing. *Earth And Planetary Science Letters*, 41(1):77–86.
- Smith, S., Swaney, D., Talaue-McManus, L., Bartley, J., Sandhei, P., McLaughlin, C., Dupra, V., Crossland, C., Buddemeier, R., Maxwell, B., and Wulff, F. (2003). Humans, hydrology, and the distribution of inorganic nutrient loading to the ocean. *Bioscience*, 53(3):235–245.



- Timmermann, R., Goosse, H., Madec, G., Fichefet, T., Ethe, C., and Duliere, V. (2005). On the representation of high latitude processes in the ORCA-LIM global coupled sea ice-ocean model. *Ocean Modelling*, 8(1-2):175–201.
- Treguer, P., Nelson, D., Vanbennekom, A., Demaster, D., Leynaert, A., and Queguiner, B. (1995). The silica balance in the world ocean - a reestimate. *Science*, 268(5209):375–379.
- Wanninkhof, R. (1992). Relationship between wind-speed and gas-exchange over the ocean. *Journal of Geophysical Research-Oceans*, 97(C5):7373–7382.
- Wiedenmann, J., Creswell, K., and Mangel, M. (2009). Connecting recruitment of Antarctic krill and sea ice. *Limnol. Oceanogr.*, 54(3):799–811.
- Wolf-Gladrow, D. A., Zeebe, R. E., Klaas, C., Koertzing, A., and Dickson, A. (2007). Total alkalinity: the explicit conservative expression and its application to biogeochemical processes. *Marine chemistry*, 106:287–300.

## Index

- $\alpha^{P_i}$ , 6  
 $\beta_{CO_3}CAL$ , 15  
 $\beta_{Si}$ , 20  
 $\delta_{P_i}$ , 6  
 $\delta_{sat}$ , 15  
 $\eta_O$ , 10  
 $\frac{O}{N_{pi}}$ , 24  
 $\frac{Si}{C}DIA$ , 20  
 $\gamma$ , 24  
 $\lambda_{DOC}^*DOC$ , 10  
 $\lambda_{GOC}^*GOC$ , 10  
 $\lambda_{OC}^*OC$ , 12  
 $\lambda_{POC}^*POC$ , 10  
 $\lambda_{GOC}^*Fe$ , 10  
 $\lambda_{POC}^*Fe$ , 10  
 $\mu^{COC}$ , 15  
 $\mu^{DIA}DIA$ , 19  
 $\mu^{P_i}$ , 6  
 $\mu_0^{P_i}$ , 6  
 $\mu_{DIA}$ , 20  
 $\nu_{p_i}^{max}$ , 12  
 $\nu_{P_i}$ , 12  
 $\phi_1^{DOC}$ , 12  
 $\phi_1^{POC}$ , 12  
 $\phi_2^{DOC}$ , 12  
 $\phi_2^{POC}$ , 12  
 $\phi_3^{DOC}$ , 12  
 $\phi_3^{POC}$ , 12  
 $\phi_4^{DOC}$ , 12  
 $\Phi_{agg}^{DOC \rightarrow GOC}$ , 12  
 $\Phi_{agg}^{DOC \rightarrow POC}$ , 12  
 $\Phi_{agg}^{POC \rightarrow GOC}$ , 12  
 $\rho_{Chl}^{P_i}$ , 6  
 $\rho_{Fe}^{P_i}$ , 16  
 $\rho_{min}$ , 13  
 $\rho_{particle} - \rho_{seawater}$ , 13  
 $\rho_{seawater}$ , 13  
 $\sigma^{Z_j}$ , 9  
 $\theta_{Chl}^{P_i}$ , 6  
 $\xi^{Z_j}$ , 9  
 $b_{BAC}$ , 12  
 $b_{P_i}$ , 6  
 $b_{Z_j}$ , 9  
 $BGE$ , 16  
 $BGE_{0^\circ}$ , 10  
 $c_{Z_j}$ , 9  
 $col$ , 24  
 $d_{BAC}$ , 10, 12  
 $d_{Z_j}$ , 9  
 $DIC_{riv}$ , 16  
 $DIN_{atm}$ , 22  
 $DIN_{nit}$ , 22  
 $DIN_{riv}$ , 22  
 $e$ , 10  
 $F_{air-sea}^{O_2}$ , 24  
 $Fe_{dep}$ , 19  
 $Fe_{P_i}^{max}$ , 6  
 $Fe_{P_i}^{min}$ , 6  
 $Fe_{P_i}^{opt}$ , 6  
 $Fe_{riv}$ , 19  
 $Fe_{scav}$ , 19  
 $Fe_{th}$ , 19  
 $FER_{BAC}$ , 10  
 $FER_{remin\_BFE\_SFE}$ , 19  
 $g_{F_i}^{Z_j}Z_j$ , 12  
 $g_0^{Z_j}$ , 9  
 $g_{max}^{Z_j}$ , 9  
 $GGE_{Z_j}$ , 9  
 $K_{FER}^{BAC}$ , 12  
 $K_{PO_4}^{BAC}$ , 12  
 $K_{DIN}^{P_i}$ , 6  
 $K_{PO_4}^{P_i}$ , 6  
 $K^{Z_j}$ , 9  
 $K_{BSI}$ , 20  
 $K_{CAL}$ , 15  
 $K_{DIN}^{FIX}$ , 22  
 $K_{DOC}^{BAC}$ , 10  
 $k_{eq}$ , 19  
 $K_{DIA}^{FER}$ , 20  
 $k_{GOC}$ , 13  
 $K_{P_i}$ , 13  
 $k_{scm}$ , 19  
 $k_{sc}$ , 19  
 $K_{SIL}$ , 19  
 $K_{SIL}^{DIA}$ , 6  
 $l_{Fe}$ , 19  
 $L_{light}$ , 6  
 $L_{lim}^{P_i}$ , 6  
 $M_{0^\circ}$ , 10  
 $m_{0^\circ}^Z$ , 9  
 $MGE_{Z_j}$ , 9  
 $N_{denit}$ , 22  
 $p_F^Z$ , 9  
 $p_F^{BAC}$ , 10  
 $PAR$ , 6  
 $PO4_{riv}$ , 22  
 $POC_{riv}$ , 13  
 $Q_{sr}$ , 6  
 $R_{0^\circ}^{BAC}$ , 10  
 $R_{0^\circ}^Z$ , 9  
 $R_{\frac{N}{C}}$ , 16  
 $R_{CAL}$ , 15  
 $R_{diss}$ , 15  
 $R_{FIX}$ , 22  
 $r_{MAC}$ , 9  
 $resp_{BAC}^{NO_3}$ , 22

*S<sub>GOC</sub>*, 13  
*S<sub>POC</sub>*, 13  
*sal*, 24  
*Schmidt<sub>CO<sub>2</sub></sub>*, 24  
*Schmidt<sub>O<sub>2</sub></sub>*, 24  
*SIL<sub>atm</sub>*, 20  
*SIL<sub>riv</sub>*, 20  
*sst*, 24  
*v*, 24  
*V<sub>sink</sub>*, 13  
*V<sub>sink</sub>CAL*, 15  
*x<sub>g</sub>*, 6  
*x<sub>r</sub>*, 6  
*y<sub>g</sub><sup>P<sub>i</sub></sup>*, 6  
*y<sub>r</sub><sup>P<sub>i</sub></sup>*, 6  
*namelist.trc.sms*, 9  
*bgcbio, bgcsnk.F90*, 16  
*bgcbio.F90*, 9, 19, 20, 22, 25  
*bgcbio*, 15  
*bgcflx.F90*, 24  
*bgcflx*, 15, 22  
*bgcint.F90*, 24  
*bgclos.F90*, 9, 12  
*bgclys.F90*, 15  
*bgclys*, 15  
*bgcnul.F90*, 10, 12, 22  
*bgcpro.F90, bgcnul.F90*, 20  
*bgcpro.F90*, 6, 15, 20, 22  
*bgcsnk.F90*, 10, 12, 13, 15, 19, 20  
*limflx.F90*, 24  
*namelist.trc.sms*, 9  
*namelist.trc.sms*, 6, 9, 10, 12, 13, 15, 19, 20, 22, 26, 27  
*river.nc*, 16  
*sms.F90*, 6  
*traqsr.F90*, 6  
*trcini.dgom.F90*, 16, 19, 20, 24  
*trcini.dgom.h*, 13  
*trcini.dgom*, 12, 22  
*trclsm.dgom.h90*, 13  
*depdic*, 16  
*F<sub>dep</sub>*, 25  
*S<sub>i</sub><sub>dep</sub>*, 25  
*alknut*, 16  
*atmdin*, 22  
*bactge*, 16  
*c00*, 24  
*consum*, 15  
*delco3*, 15  
*denitr*, 22  
*depdic*, 16  
*depdoc*, 12  
*depfer*, 19  
*depnit*, 22  
*deppo4*, 22  
*deppoc*, 13  
*depsil*, 20  
*dinpft*, 22  
*dnsmin*, 13  
*etot*, 6  
*flu16*, 24  
*freeze*, 24  
*gramat*, 12  
*gramet*, 12  
*gramit*, 12  
*graze2*, 9  
*graze3*, 9  
*graze*, 9  
*irondep*, 19  
*ligfer*, 19  
*macrge*, 9  
*mesoge*, 9  
*micrge*, 9  
*nitrfac*, 22  
*ofer2*, 10  
*ofer*, 10  
*olimi*, 10, 12  
*orem2*, 10, 12  
*orem*, 10, 12  
*pctnut*, 6  
*perfrm*, 6  
*prophy*, 6, 15, 20  
*qsr*, 6  
*rbafer*, 19  
*remco3*, 15  
*rhochl*, 6  
*rhop*, 13  
*rn\_ag1poc*, 12, 27  
*rn\_ag2poc*, 12, 27  
*rn\_ag3poc*, 12, 27  
*rn\_ag4poc*, 12, 27  
*rn\_ag5doc*, 12, 27  
*rn\_ag6doc*, 12, 27  
*rn\_alpphy*, 6, 27  
*rn\_coccal*, 15, 27  
*rn\_discal*, 15, 27  
*rn\_docphy*, 12, 27  
*rn\_domphy*, 12, 27  
*rn\_ekwgrn*, 6, 27  
*rn\_ekwred*, 6, 27  
*rn\_etomax*, 27  
*rn\_faco18*, 27  
*rn\_fersol*, 25, 27  
*rn\_gbadoc*, 10, 27  
*rn\_gbagoc*, 10, 27  
*rn\_gbapoc*, 10, 27  
*rn\_ggebac*, 10, 27  
*rn\_ggemac*, 9, 27  
*rn\_ggemes*, 9, 27  
*rn\_ggemic*, 9, 27  
*rn\_ggtbac*, 10  
*rn\_gmabac*, 9, 27  
*rn\_gmagoc*, 9, 27

rn\_gmames, 9, 27  
 rn\_gmamic, 9, 27  
 rn\_gmaphy, 9, 27  
 rn\_gmapoc, 9, 27  
 rn\_gmebac, 9, 27  
 rn\_gmegoc, 9, 27  
 rn\_gmemic, 9, 27  
 rn\_gmephy, 9, 27  
 rn\_gmepoc, 9, 27  
 rn\_gmibac, 9, 27  
 rn\_gmigoc, 9, 27  
 rn\_gmiphy, 9, 27  
 rn\_gmipoc, 9, 28  
 rn\_grabac, 10, 28  
 rn\_gramac, 9, 28  
 rn\_grames, 9, 28  
 rn\_gramic, 9, 28  
 rn\_grkmac, 9, 28  
 rn\_grkmes, 9, 28  
 rn\_grkmic, 9, 28  
 rn\_icemac, 9, 28  
 rn\_kgrphy, 6, 28  
 rn\_kmfbac, 12, 28  
 rn\_kmfphy, 20, 28  
 rn\_kmnphy, 6, 22, 28  
 rn\_kmobac, 10, 28  
 rn\_kmpbac, 12, 28  
 rn\_kmpphy, 6, 28  
 rn\_kmsbsi, 20, 28  
 rn\_krdphy, 6, 28  
 rn\_lyscal, 15, 28  
 rn\_mokpft, 13  
 rn\_mormac, 9, 28  
 rn\_mormes, 9, 28  
 rn\_motmac, 9, 28  
 rn\_motmes, 9, 28  
 rn\_mumpft, 6, 28  
 rn\_munfix, 22, 29  
 rn\_mutpft, 6, 9, 12, 29  
 rn\_qmaphy, 6, 29  
 rn\_qmiphy, 6, 29  
 rn\_qopphy, 6, 29  
 rn\_resbac, 10, 29  
 rn\_resmac, 9, 29  
 rn\_resmes, 9, 29  
 rn\_resmic, 9, 29  
 rn\_resphy, 6, 29  
 rn\_retbac, 10, 12, 29  
 rn\_retmac, 9, 29  
 rn\_retmes, 9, 29  
 rn\_retmic, 9, 29  
 rn\_rhfphy, 19, 29  
 rn\_rivdic, 26, 29  
 rn\_rivdoc, 26, 29  
 rn\_rivfer, 26, 29  
 rn\_rivnit, 26  
 rn\_rivpo4, 26, 29  
 rn\_rivpoc, 26, 29  
 rn\_rivsil, 26, 29  
 rn\_scmfer, 19, 29  
 rn\_scofer, 19, 29  
 rn\_sedfer, 26, 29  
 rn\_sigmac, 9, 29  
 rn\_sigmes, 9, 29  
 rn\_sigmic, 9, 29  
 rn\_sildia, 6, 29  
 rn\_singoc, 13, 29  
 rn\_snkgoc, 13, 29  
 rn\_snkpoc, 13, 29  
 rn\_thmphy, 6, 29  
 rn\_unamac, 9, 30  
 rn\_unames, 9, 30  
 rn\_unamic, 9, 30  
 schmico2, 24  
 schmio2, 24  
 sidep, 20  
 silfac, 20  
 sinkcal, 15  
 siremin, 20  
 sn, 24  
 tn, 24  
 ubafer, 10  
 wndm, 24  
 xaggdoc2, 12  
 xaggdoc, 12  
 xagg, 12  
 xdens, 13  
 xkeq, 19  
 xlim8, 6  
 xlimpft, 6  
 xscave, 19  
 xvsink, 13
