# Supplementary material for: Role of zooplankton dynamics for Southern Ocean phytoplankton biomass andglobal biogeochemical cycles
Source: Copernicus journal article supplement (doi:10.5194/bg-13-4111-2016), 2016-07-18
Supplement: Supplementary file 2 [file PlankTOM10_phytoplankton_growth_rates.pdf › PlankTOM10_phytoplankton_growth_rates.pdf]

Supplementary Table 1: Phytoplankton growth rates as a function of temperature for six phytoplankton groups, compiled from published data and including new data from this study.

| T °C | $\mu$ (d-1) | Phytoplankton group |                                      | Reference                               |
|------|-------------|---------------------|--------------------------------------|-----------------------------------------|
| 28   | 0.14        | N2-fixers           | [LaRoche and Breitbarth, 2005]       | La Roche and Breitbarth 2005            |
| 25   | 0.17        | N2-fixers           | [Levitan et al., 2007]               | Levitan et al. 2007                     |
| 25   | 0.23        | N2-fixers           | [Prufertboubout et al., 1993]        | Prufert-Befout et al. 1993              |
| 28   | 0.07        | N2-fixers           | [Mulholland and Capone, 1999]        | Mulholland and Capone 1999              |
| 26   | 0.12        | N2-fixers           | [Berman-Frank et al., 2001]          | Berman-Frank et al. 2001                |
| 26   | 0.3         | N2-fixers           | [C. Holl and Montoya, 2005]          | Holl and Montoya 2005                   |
| 23   | 0.2         | N2-fixers           | [Ohki and Fujita, 1982]              | Ohki and Fujita 1982                    |
| 26   | 0.51        | N2-fixers           | [C. Holl, 2004]                      | Holl 2004                               |
| 26.5 | 0.008       | N2-fixers           | [E. J. Carpenter and Mccarthy, 1975] | Carpenter and McCarthy 1975             |
| 26.5 | 0.018       | N2-fixers           | [E. J. Carpenter and Price, 1976]    | Carpenter and McCarthy 1976             |
| 27   | 0.008       | N2-fixers           | [E. J. Carpenter and Price, 1977]    | Carpenter and McCarthy 1977             |
| 27   | 0.01        | N2-fixers           | [Mccarthy and Carpenter, 1979]       | Carpenter and McCarthy 1979 (corrected) |
| 27   | 0.005       | N2-fixers           | [E.J. Carpenter and Lively, 1980]    | Carpenter and McCarthy 1980             |
| 27   | 0.23        | N2-fixers           | [E. J. Carpenter et al., 1993]       | Carpenter et al. 1993                   |
| 27   | 0.18        | N2-fixers           | [E. J. Carpenter et al., 1993]       | Carpenter et al. 1993                   |
| 18.6 | 0           | N2-fixers           | [Breitbarth et al., 2007]            | Breitbarth et al. 2007                  |
| 20   | 0.03        | N2-fixers           | [Breitbarth et al., 2007]            | Breitbarth et al. 2007                  |
| 20   | 0.03        | N2-fixers           | [Breitbarth et al., 2007]            | Breitbarth et al. 2007                  |
| 20   | 0.05        | N2-fixers           | [Breitbarth et al., 2007]            | Breitbarth et al. 2007                  |
| 21.2 | 0.08        | N2-fixers           | [Breitbarth et al., 2007]            | Breitbarth et al. 2007                  |
| 21   | 0.1         | N2-fixers           | [Breitbarth et al., 2007]            | Breitbarth et al. 2007                  |
| 21   | 0.1         | N2-fixers           | [Breitbarth et al., 2007]            | Breitbarth et al. 2007                  |
| 24   | 0.17        | N2-fixers           | [Breitbarth et al., 2007]            | Breitbarth et al. 2007                  |
| 24   | 0.17        | N2-fixers           | [Breitbarth et al., 2007]            | Breitbarth et al. 2007                  |
| 24   | 0.18        | N2-fixers           | [Breitbarth et al., 2007]            | Breitbarth et al. 2007                  |
| 27.1 | 0.24        | N2-fixers           | [Breitbarth et al., 2007]            | Breitbarth et al. 2007                  |
| 27.1 | 0.25        | N2-fixers           | [Breitbarth et al., 2007]            | Breitbarth et al. 2007                  |
| 30   | 0.24        | N2-fixers           | [Breitbarth et al., 2007]            | Breitbarth et al. 2007                  |
| 30   | 0.23        | N2-fixers           | [Breitbarth et al., 2007]            | Breitbarth et al. 2007                  |
| 30   | 0.21        | N2-fixers           | [Breitbarth et al., 2007]            | Breitbarth et al. 2007                  |
| 31.2 | 0.15        | N2-fixers           | [Breitbarth et al., 2007]            | Breitbarth et al. 2007                  |
| 32.1 | 0.15        | N2-fixers           | [Breitbarth et al., 2007]            | Breitbarth et al. 2007                  |

|       |      |                   |                           |                        |
|-------|------|-------------------|---------------------------|------------------------|
| 34    | 0.07 | N2-fixers         | [Breitbarth et al., 2007] | Breitbarth et al. 2007 |
| 36.2  | 0    | N2-fixers         | [Breitbarth et al., 2007] | Breitbarth et al. 2007 |
|       |      |                   |                           |                        |
| 12.7  | 0.12 | picophytoplankton | [Moore et al., 1995]      | Moore 95               |
| 14.63 | 0.21 | picophytoplankton | [Moore et al., 1995]      | Moore 95               |
| 17.59 | 0.28 | picophytoplankton | [Moore et al., 1995]      | Moore 95               |
| 19.13 | 0.43 | picophytoplankton | [Moore et al., 1995]      | Moore 95               |
| 22.03 | 0.54 | picophytoplankton | [Moore et al., 1995]      | Moore 95               |
| 23.64 | 0.58 | picophytoplankton | [Moore et al., 1995]      | Moore 95               |
| 25.65 | 0.44 | picophytoplankton | [Moore et al., 1995]      | Moore 95               |
| 14.64 | 0.16 | picophytoplankton | [Moore et al., 1995]      | Moore 95               |
| 17.59 | 0.31 | picophytoplankton | [Moore et al., 1995]      | Moore 95               |
| 19.06 | 0.48 | picophytoplankton | [Moore et al., 1995]      | Moore 95               |
| 22.02 | 0.55 | picophytoplankton | [Moore et al., 1995]      | Moore 95               |
| 23.63 | 0.6  | picophytoplankton | [Moore et al., 1995]      | Moore 95               |
| 25.65 | 0.49 | picophytoplankton | [Moore et al., 1995]      | Moore 95               |
| 14.63 | 0.21 | picophytoplankton | [Moore et al., 1995]      | Moore 95               |
| 17.59 | 0.35 | picophytoplankton | [Moore et al., 1995]      | Moore 95               |
| 19.06 | 0.46 | picophytoplankton | [Moore et al., 1995]      | Moore 95               |
| 22.02 | 0.6  | picophytoplankton | [Moore et al., 1995]      | Moore 95               |
| 23.62 | 0.69 | picophytoplankton | [Moore et al., 1995]      | Moore 95               |
| 25.62 | 0.77 | picophytoplankton | [Moore et al., 1995]      | Moore 95               |
| 27.81 | 0.8  | picophytoplankton | [Moore et al., 1995]      | Moore 95               |
| 30.28 | 0.65 | picophytoplankton | [Moore et al., 1995]      | Moore 95               |
| 32.05 | 0.42 | picophytoplankton | [Moore et al., 1995]      | Moore 95               |
| 17.01 | 0.16 | picophytoplankton | [Johnson et al., 2006]    | Johnson 06 suppl 5A    |
| 18.04 | 0.16 | picophytoplankton | [Johnson et al., 2006]    | Johnson 06 suppl 5A    |
| 19    | 0.22 | picophytoplankton | [Johnson et al., 2006]    | Johnson 06 suppl 5A    |
| 22.11 | 0.36 | picophytoplankton | [Johnson et al., 2006]    | Johnson 06 suppl 5A    |
| 23.06 | 0.4  | picophytoplankton | [Johnson et al., 2006]    | Johnson 06 suppl 5A    |
| 24.01 | 0.45 | picophytoplankton | [Johnson et al., 2006]    | Johnson 06 suppl 5A    |
| 25.05 | 0.5  | picophytoplankton | [Johnson et al., 2006]    | Johnson 06 suppl 5A    |
| 26    | 0.43 | picophytoplankton | [Johnson et al., 2006]    | Johnson 06 suppl 5A    |
| 27.04 | 0.47 | picophytoplankton | [Johnson et al., 2006]    | Johnson 06 suppl 5A    |
| 27.99 | 0.43 | picophytoplankton | [Johnson et al., 2006]    | Johnson 06 suppl 5A    |
| 29.03 | 0.43 | picophytoplankton | [Johnson et al., 2006]    | Johnson 06 suppl 5A    |
| 30.07 | 0.45 | picophytoplankton | [Johnson et al., 2006]    | Johnson 06 suppl 5A    |
| 31.02 | 0.43 | picophytoplankton | [Johnson et al., 2006]    | Johnson 06 suppl 5A    |
| 17.01 | 0.28 | picophytoplankton | [Johnson et al., 2006]    | Johnson 06 suppl 5A    |
| 18.04 | 0.28 | picophytoplankton | [Johnson et al., 2006]    | Johnson 06 suppl 5A    |
| 19    | 0.32 | picophytoplankton | [Johnson et al., 2006]    | Johnson 06 suppl 5A    |
| 21.07 | 0.36 | picophytoplankton | [Johnson et al., 2006]    | Johnson 06 suppl 5A    |
| 22.02 | 0.49 | picophytoplankton | [Johnson et al., 2006]    | Johnson 06 suppl 5A    |
| 23.06 | 0.54 | picophytoplankton | [Johnson et al., 2006]    | Johnson 06 suppl 5A    |
| 24.01 | 0.58 | picophytoplankton | [Johnson et al., 2006]    | Johnson 06 suppl 5A    |

|       |      |                   |                                |                                                             |
|-------|------|-------------------|--------------------------------|-------------------------------------------------------------|
| 25.05 | 0.62 | picophytoplankton | [Johnson et al., 2006]         | Johnson 06 suppl 5A                                         |
| 26    | 0.59 | picophytoplankton | [Johnson et al., 2006]         | Johnson 06 suppl 5A                                         |
| 27.04 | 0.61 | picophytoplankton | [Johnson et al., 2006]         | Johnson 06 suppl 5A                                         |
| 28.08 | 0.47 | picophytoplankton | [Johnson et al., 2006]         | Johnson 06 suppl 5A                                         |
| 29.03 | 0.33 | picophytoplankton | [Johnson et al., 2006]         | Johnson 06 suppl 5A                                         |
| 10.94 | 0.08 | picophytoplankton | [Johnson et al., 2006]         | Johnson 06 suppl 5B                                         |
| 12.91 | 0.21 | picophytoplankton | [Johnson et al., 2006]         | Johnson 06 suppl 5B                                         |
| 13.94 | 0.24 | picophytoplankton | [Johnson et al., 2006]         | Johnson 06 suppl 5B                                         |
| 14.89 | 0.23 | picophytoplankton | [Johnson et al., 2006]         | Johnson 06 suppl 5B                                         |
| 16.95 | 0.3  | picophytoplankton | [Johnson et al., 2006]         | Johnson 06 suppl 5B                                         |
| 17.99 | 0.3  | picophytoplankton | [Johnson et al., 2006]         | Johnson 06 suppl 5B                                         |
| 18.93 | 0.32 | picophytoplankton | [Johnson et al., 2006]         | Johnson 06 suppl 5B                                         |
| 21.94 | 0.36 | picophytoplankton | [Johnson et al., 2006]         | Johnson 06 suppl 5B                                         |
| 22.98 | 0.4  | picophytoplankton | [Johnson et al., 2006]         | Johnson 06 suppl 5B                                         |
| 23.92 | 0.39 | picophytoplankton | [Johnson et al., 2006]         | Johnson 06 suppl 5B                                         |
| 24.96 | 0.39 | picophytoplankton | [Johnson et al., 2006]         | Johnson 06 suppl 5B                                         |
| 25.91 | 0.37 | picophytoplankton | [Johnson et al., 2006]         | Johnson 06 suppl 5B                                         |
| 26.95 | 0.33 | picophytoplankton | [Johnson et al., 2006]         | Johnson 06 suppl 5B                                         |
| 10.94 | 0.1  | picophytoplankton | [Johnson et al., 2006]         | Johnson 06 suppl 5B                                         |
| 13    | 0.19 | picophytoplankton | [Johnson et al., 2006]         | Johnson 06 suppl 5B                                         |
| 13.94 | 0.21 | picophytoplankton | [Johnson et al., 2006]         | Johnson 06 suppl 5B                                         |
| 14.97 | 0.24 | picophytoplankton | [Johnson et al., 2006]         | Johnson 06 suppl 5B                                         |
| 17.99 | 0.27 | picophytoplankton | [Johnson et al., 2006]         | Johnson 06 suppl 5B                                         |
| 18.93 | 0.33 | picophytoplankton | [Johnson et al., 2006]         | Johnson 06 suppl 5B                                         |
| 23.92 | 0.46 | picophytoplankton | [Johnson et al., 2006]         | Johnson 06 suppl 5B                                         |
| 24.95 | 0.46 | picophytoplankton | [Johnson et al., 2006]         | Johnson 06 suppl 5B                                         |
| 25.9  | 0.42 | picophytoplankton | [Johnson et al., 2006]         | Johnson 06 suppl 5B                                         |
| 27.99 | 0.28 | picophytoplankton | [Johnson et al., 2006]         | Johnson 06 suppl 5B                                         |
| 20    | 1.85 | picophytoplankton | [Glover et al., 1987]          | Glover et al 1987                                           |
| 22.5  | 1.87 | picophytoplankton | [Kana and Glibert, 1987]       | Kana and Glibert 1987                                       |
| 25.5  | 2.02 | picophytoplankton | [Kana and Glibert, 1987]       | Kana and Glibert 1987                                       |
| 28.7  | 1.42 | picophytoplankton | [Landry et al., 1984]          | Landry et al MEPS 1984<br>(mean SST used as T not reported) |
| 28.7  | 1.98 | picophytoplankton | [Landry et al., 1984]          | Landry et al MEPS 1984 (mean SST used as T not reported)    |
| 22.5  | 1.69 | picophytoplankton | [Kana and Glibert, 1987]       | Kana 1987                                                   |
| 23.5  | 1.71 | picophytoplankton | [Kana and Glibert, 1987]       | Kana 1987                                                   |
| 24    | 1.75 | picophytoplankton | [Kana and Glibert, 1987]       | Kana 1987                                                   |
| 25.5  | 1.95 | picophytoplankton | [Kana and Glibert, 1987]       | Kana 1987                                                   |
| 25    | 1.69 | picophytoplankton | [Binder and Liu, 1998]         | Binder 1998                                                 |
| 25    | 1.11 | picophytoplankton | [Campbell and Carpenter, 1986] | Campbell 1986                                               |
| -0.41 | 0.31 | picophytoplankton | [Agawin et al., 1998]          | Agawin 1998                                                 |
| 3.9   | 0.2  | picophytoplankton | [Agawin et al., 1998]          | Agawin 1998                                                 |
| 4.73  | 0.29 | picophytoplankton | [Agawin et al., 1998]          | Agawin 1998                                                 |

|       |      |                   |                       |             |
|-------|------|-------------------|-----------------------|-------------|
| 6.06  | 0.24 | picophytoplankton | [Agawin et al., 1998] | Agawin 1998 |
| 7.19  | 0    | picophytoplankton | [Agawin et al., 1998] | Agawin 1998 |
| 7.6   | 0.63 | picophytoplankton | [Agawin et al., 1998] | Agawin 1998 |
| 10.07 | 0.55 | picophytoplankton | [Agawin et al., 1998] | Agawin 1998 |
| 10.68 | 0.29 | picophytoplankton | [Agawin et al., 1998] | Agawin 1998 |
| 11.1  | 0.03 | picophytoplankton | [Agawin et al., 1998] | Agawin 1998 |
| 11.61 | 0    | picophytoplankton | [Agawin et al., 1998] | Agawin 1998 |
| 13.15 | 0.25 | picophytoplankton | [Agawin et al., 1998] | Agawin 1998 |
| 13.15 | 0.52 | picophytoplankton | [Agawin et al., 1998] | Agawin 1998 |
| 13.66 | 0.46 | picophytoplankton | [Agawin et al., 1998] | Agawin 1998 |
| 13.15 | 0.85 | picophytoplankton | [Agawin et al., 1998] | Agawin 1998 |
| 14.38 | 0.81 | picophytoplankton | [Agawin et al., 1998] | Agawin 1998 |
| 15.1  | 0.69 | picophytoplankton | [Agawin et al., 1998] | Agawin 1998 |
| 15.1  | 0.6  | picophytoplankton | [Agawin et al., 1998] | Agawin 1998 |
| 15.1  | 0.54 | picophytoplankton | [Agawin et al., 1998] | Agawin 1998 |
| 15.1  | 0.26 | picophytoplankton | [Agawin et al., 1998] | Agawin 1998 |
| 15.1  | 0.1  | picophytoplankton | [Agawin et al., 1998] | Agawin 1998 |
| 15.82 | 1.1  | picophytoplankton | [Agawin et al., 1998] | Agawin 1998 |
| 16.13 | 1.1  | picophytoplankton | [Agawin et al., 1998] | Agawin 1998 |
| 16.13 | 1.05 | picophytoplankton | [Agawin et al., 1998] | Agawin 1998 |
| 18.39 | 0.99 | picophytoplankton | [Agawin et al., 1998] | Agawin 1998 |
| 18.6  | 1.01 | picophytoplankton | [Agawin et al., 1998] | Agawin 1998 |
| 18.49 | 0.92 | picophytoplankton | [Agawin et al., 1998] | Agawin 1998 |
| 18.18 | 0.46 | picophytoplankton | [Agawin et al., 1998] | Agawin 1998 |
| 18.6  | 0.65 | picophytoplankton | [Agawin et al., 1998] | Agawin 1998 |
| 18.8  | 0.69 | picophytoplankton | [Agawin et al., 1998] | Agawin 1998 |
| 19.11 | 0.67 | picophytoplankton | [Agawin et al., 1998] | Agawin 1998 |
| 19.11 | 0.55 | picophytoplankton | [Agawin et al., 1998] | Agawin 1998 |
| 19.11 | 0.84 | picophytoplankton | [Agawin et al., 1998] | Agawin 1998 |
| 19.11 | 1.11 | picophytoplankton | [Agawin et al., 1998] | Agawin 1998 |
| 18.7  | 1.23 | picophytoplankton | [Agawin et al., 1998] | Agawin 1998 |
| 19.83 | 0.42 | picophytoplankton | [Agawin et al., 1998] | Agawin 1998 |
| 20.14 | 0.33 | picophytoplankton | [Agawin et al., 1998] | Agawin 1998 |
| 21.16 | 0.38 | picophytoplankton | [Agawin et al., 1998] | Agawin 1998 |
| 20.86 | 0.5  | picophytoplankton | [Agawin et al., 1998] | Agawin 1998 |
| 20.65 | 0.59 | picophytoplankton | [Agawin et al., 1998] | Agawin 1998 |
| 21.16 | 0.6  | picophytoplankton | [Agawin et al., 1998] | Agawin 1998 |
| 22.09 | 0.58 | picophytoplankton | [Agawin et al., 1998] | Agawin 1998 |
| 22.19 | 0.43 | picophytoplankton | [Agawin et al., 1998] | Agawin 1998 |
| 23.32 | 0.38 | picophytoplankton | [Agawin et al., 1998] | Agawin 1998 |
| 22.81 | 0.59 | picophytoplankton | [Agawin et al., 1998] | Agawin 1998 |
| 23.12 | 0.65 | picophytoplankton | [Agawin et al., 1998] | Agawin 1998 |
| 25.07 | 0.48 | picophytoplankton | [Agawin et al., 1998] | Agawin 1998 |
| 25.07 | 0.6  | picophytoplankton | [Agawin et al., 1998] | Agawin 1998 |
| 26.1  | 0.58 | picophytoplankton | [Agawin et al., 1998] | Agawin 1998 |

|       |      |                   |                           |             |
|-------|------|-------------------|---------------------------|-------------|
| 26.4  | 0.55 | picophytoplankton | [Agawin et al., 1998]     | Agawin 1998 |
| 25.58 | 0.69 | picophytoplankton | [Agawin et al., 1998]     | Agawin 1998 |
| 25.99 | 0.85 | picophytoplankton | [Agawin et al., 1998]     | Agawin 1998 |
| 25.07 | 0.76 | picophytoplankton | [Agawin et al., 1998]     | Agawin 1998 |
| 23.84 | 0.79 | picophytoplankton | [Agawin et al., 1998]     | Agawin 1998 |
| 22.09 | 0.73 | picophytoplankton | [Agawin et al., 1998]     | Agawin 1998 |
| 22.09 | 0.76 | picophytoplankton | [Agawin et al., 1998]     | Agawin 1998 |
| 22.09 | 0.84 | picophytoplankton | [Agawin et al., 1998]     | Agawin 1998 |
| 22.09 | 0.88 | picophytoplankton | [Agawin et al., 1998]     | Agawin 1998 |
| 21.58 | 0.84 | picophytoplankton | [Agawin et al., 1998]     | Agawin 1998 |
| 25.07 | 0.93 | picophytoplankton | [Agawin et al., 1998]     | Agawin 1998 |
| 26.2  | 0.99 | picophytoplankton | [Agawin et al., 1998]     | Agawin 1998 |
| 23.12 | 1.32 | picophytoplankton | [Agawin et al., 1998]     | Agawin 1998 |
| 25.07 | 1.22 | picophytoplankton | [Agawin et al., 1998]     | Agawin 1998 |
| 23.63 | 1.74 | picophytoplankton | [Agawin et al., 1998]     | Agawin 1998 |
| 24.14 | 1.79 | picophytoplankton | [Agawin et al., 1998]     | Agawin 1998 |
| 25.17 | 1.71 | picophytoplankton | [Agawin et al., 1998]     | Agawin 1998 |
| 25.58 | 2    | picophytoplankton | [Agawin et al., 1998]     | Agawin 1998 |
| 25.27 | 2.33 | picophytoplankton | [Agawin et al., 1998]     | Agawin 1998 |
| 21.16 | 1.13 | picophytoplankton | [Agawin et al., 1998]     | Agawin 1998 |
| 21.16 | 1.24 | picophytoplankton | [Agawin et al., 1998]     | Agawin 1998 |
| 6     | 0.32 | coccolithophores  | [Buitenhuis et al., 2008] | Buitenhuis  |
| 9     | 0.23 | coccolithophores  | [Buitenhuis et al., 2008] | Buitenhuis  |
| 12    | 0.68 | coccolithophores  | [Buitenhuis et al., 2008] | Buitenhuis  |
| 15    | 0.95 | coccolithophores  | [Buitenhuis et al., 2008] | Buitenhuis  |
| 15    | 0.99 | coccolithophores  | [Buitenhuis et al., 2008] | Buitenhuis  |
| 20    | 1.38 | coccolithophores  | [Buitenhuis et al., 2008] | Buitenhuis  |
| 20    | 1.62 | coccolithophores  | [Buitenhuis et al., 2008] | Buitenhuis  |
| 25    | 0.81 | coccolithophores  | [Buitenhuis et al., 2008] | Buitenhuis  |
| 12    | 0.21 | coccolithophores  | [Buitenhuis et al., 2008] | Buitenhuis  |
| 15    | 0.62 | coccolithophores  | [Buitenhuis et al., 2008] | Buitenhuis  |
| 15    | 0.65 | coccolithophores  | [Buitenhuis et al., 2008] | Buitenhuis  |
| 20    | 0.81 | coccolithophores  | [Buitenhuis et al., 2008] | Buitenhuis  |
| 20    | 0.72 | coccolithophores  | [Buitenhuis et al., 2008] | Buitenhuis  |
| 25    | 0.89 | coccolithophores  | [Buitenhuis et al., 2008] | Buitenhuis  |
| 9     | 0.02 | coccolithophores  | [Buitenhuis et al., 2008] | Buitenhuis  |
| 12    | 0.35 | coccolithophores  | [Buitenhuis et al., 2008] | Buitenhuis  |
| 15    | 0.38 | coccolithophores  | [Buitenhuis et al., 2008] | Buitenhuis  |
| 15    | 0.41 | coccolithophores  | [Buitenhuis et al., 2008] | Buitenhuis  |
| 20    | 0.44 | coccolithophores  | [Buitenhuis et al., 2008] | Buitenhuis  |
| 20    | 0.21 | coccolithophores  | [Buitenhuis et al., 2008] | Buitenhuis  |
| 6     | 0.14 | coccolithophores  | [Buitenhuis et al., 2008] | Buitenhuis  |
| 12    | 0.35 | coccolithophores  | [Buitenhuis et al., 2008] | Buitenhuis  |
| 15    | 0.37 | coccolithophores  | [Buitenhuis et al., 2008] | Buitenhuis  |
| 15    | 0.41 | coccolithophores  | [Buitenhuis et al., 2008] | Buitenhuis  |

|       |      |                  |                                      |            |
|-------|------|------------------|--------------------------------------|------------|
| 20    | 0.36 | coccolithophores | [Buitenhuis et al., 2008]            | Buitenhuis |
| 20    | 0.31 | coccolithophores | [Buitenhuis et al., 2008]            | Buitenhuis |
| 9     | 0.02 | coccolithophores | [Buitenhuis et al., 2008]            | Buitenhuis |
| 12    | 0.57 | coccolithophores | [Buitenhuis et al., 2008]            | Buitenhuis |
| 15    | 0.31 | coccolithophores | [Buitenhuis et al., 2008]            | Buitenhuis |
| 15    | 0.33 | coccolithophores | [Buitenhuis et al., 2008]            | Buitenhuis |
| 20    | 0.31 | coccolithophores | [Buitenhuis et al., 2008]            | Buitenhuis |
| 20    | 0.2  | coccolithophores | [Buitenhuis et al., 2008]            | Buitenhuis |
| 25    | 0.32 | coccolithophores | [Buitenhuis et al., 2008]            | Buitenhuis |
| 15    | 0.87 | coccolithophores | [Nielsen, 1995]                      | Nielsen,   |
| 17    | 0.99 | coccolithophores | [Fritz and Balch, 1996]              | Fritz      |
| 16    | 0.41 | coccolithophores | [D. L. Muggli and Harrison, 1996]    | Muggli     |
| 15    | 0.65 | coccolithophores | [Riegman et al., 1998]               | Riegman    |
| 15.3  | 1.2  | coccolithophores | [Zondervan, 2001]                    | Zondervan  |
| 16    | 0.46 | coccolithophores | [D. L. Muggli and Harrison, 1996]    | Muggli     |
| 15    | 0.59 | coccolithophores | [Riegman et al., 1998]               | Riegman    |
| 17    | 0.99 | coccolithophores | [Balch et al., 1996]                 | Balch      |
| 17    | 0.67 | coccolithophores | [Fritz, 1999]                        | Fritz      |
| 20    | 0.8  | coccolithophores | [Mjaaland, 1956]                     | Mjaaland   |
| 20    | 0.7  | coccolithophores | [Mjaaland, 1956]                     | Mjaaland   |
| 18.24 | 1.23 | coccolithophores | [Watabe and Wilbur, 1966]            | Watabe     |
| 21    | 1.85 | coccolithophores | [R. W. Eppley and P. R. Sloan, 1966] | Eppley     |
| 21.23 | 1.75 | coccolithophores | [Paasche, 1967]                      | Paasche    |
| 20    | 1.36 | coccolithophores | [Nelson and Brand, 1979]             | Nelson     |
| 20    | 1.18 | coccolithophores | [Nelson and Brand, 1979]             | Nelson     |
| 20    | 0.91 | coccolithophores | [Nelson and Brand, 1979]             | Nelson     |
| 20    | 1.36 | coccolithophores | [Nelson and Brand, 1979]             | Nelson     |
| 20    | 1.89 | coccolithophores | [Nelson and Brand, 1979]             | Nelson     |
| 20    | 1.53 | coccolithophores | [Nelson and Brand, 1979]             | Nelson     |
| 20    | 1.8  | coccolithophores | [Brand, 1984]                        | Brand      |
| 20    | 1.87 | coccolithophores | [Brand, 1984]                        | Brand      |
| 20    | 1.53 | coccolithophores | [Brand, 1984]                        | Brand      |
| 20    | 1.14 | coccolithophores | [Brand, 1984]                        | Brand      |
| 18.23 | 1.3  | coccolithophores | [Fisher and Honjo, 1989]             | Fisher     |
| 18    | 1.55 | coccolithophores | [Fisher and Honjo, 1989]             | Fisher     |
| 20    | 1.26 | coccolithophores | [Paasche and Brubak, 1994]           | Paasche    |
| 20    | 1.89 | coccolithophores | [Rhodes et al., 1995]                | Rhodes     |
| 20    | 1.26 | coccolithophores | [W G Sunda and Huntsman, 1995]       | Sunda      |
| 20    | 2    | coccolithophores | [Paasche et al., 1996]               | Paasche    |
| 20    | 1.93 | coccolithophores | [Paasche et al., 1996]               | Paasche    |
| 20    | 2    | coccolithophores | [Paasche et al., 1996]               | Paasche    |
| 20    | 1.1  | coccolithophores | [Paasche et al., 1996]               | Paasche    |

|       |      |                  |                                 |             |
|-------|------|------------------|---------------------------------|-------------|
| 20    | 1.86 | coccolithophores | [Paasche et al., 1996]          | Paasche     |
| 20    | 1.5  | coccolithophores | [Paasche et al., 1996]          | Paasche     |
| 20    | 1.4  | coccolithophores | [Paasche, 1998]                 | Paasche     |
| 23    | 0.9  | coccolithophores | [van Rijssel and Gieskes, 2002] | Rijssel     |
| 17    | 0.7  | coccolithophores | [Franklin et al., 2010]         | D. Franklin |
| 17    | 0.44 | coccolithophores | [Franklin et al., 2010]         | Franklin    |
| 17    | 0.34 | coccolithophores | [Franklin et al., 2010]         | Franklin    |
| 17    | 0.4  | coccolithophores | [Franklin et al., 2010]         | Franklin    |
| 17    | 0.56 | coccolithophores | [Franklin et al., 2010]         | Franklin    |
| 17    | 0.46 | coccolithophores | [Franklin et al., 2010]         | Franklin    |
| 17    | 0.47 | coccolithophores | [Franklin et al., 2010]         | Franklin    |
| 17    | 0.25 | coccolithophores | [Franklin et al., 2010]         | Franklin    |
| 17    | 0.19 | coccolithophores | [Franklin et al., 2010]         | Franklin    |
| 17    | 0.41 | coccolithophores | [Franklin et al., 2010]         | Franklin    |
| 17    | 0.49 | coccolithophores | [Franklin et al., 2010]         | Franklin    |
| 11.67 | 0.25 | coccolithophores | [Blankley and Lewin, 1976]      | Blankley    |
| 15.83 | 0.37 | coccolithophores | [Blankley and Lewin, 1976]      | Blankley    |
| 14.97 | 0.43 | coccolithophores | [Blankley and Lewin, 1976]      | Blankley    |
| 17.48 | 0.44 | coccolithophores | [Blankley and Lewin, 1976]      | Blankley    |
| 18.98 | 0.48 | coccolithophores | [Blankley and Lewin, 1976]      | Blankley    |
| 18.95 | 0.57 | coccolithophores | [Blankley and Lewin, 1976]      | Blankley    |
| 20.64 | 0.55 | coccolithophores | [Blankley and Lewin, 1976]      | Blankley    |
| 22.16 | 0.53 | coccolithophores | [Blankley and Lewin, 1976]      | Blankley    |
| 22.49 | 0.53 | coccolithophores | [Blankley and Lewin, 1976]      | Blankley    |
| 24.58 | 0.34 | coccolithophores | [Blankley and Lewin, 1976]      | Blankley    |
| 27.14 | 0.22 | coccolithophores | [Blankley and Lewin, 1976]      | Blankley    |
| 17    | 1.34 | coccolithophores | [Price et al., 1998]            | Price       |
| 17    | 1.8  | coccolithophores | [Price et al., 1998]            | Price       |
| 17    | 0.49 | coccolithophores | [Price et al., 1998]            | Price       |
| 17    | 0.76 | coccolithophores | [Price et al., 1998]            | Price       |
| 17    | 0.36 | coccolithophores | [Price et al., 1998]            | Price       |
| 17    | 0.49 | coccolithophores | [Price et al., 1998]            | Price       |
| 17    | 0.78 | coccolithophores | [Price et al., 1998]            | Price       |
| 17    | 0.46 | coccolithophores | [Price et al., 1998]            | Price       |
| 17    | 1.02 | coccolithophores | [Price et al., 1998]            | Price       |
| 17    | 0.78 | coccolithophores | [Price et al., 1998]            | Price       |
| 17    | 0.89 | coccolithophores | [Price et al., 1998]            | Price       |
| 17    | 0.87 | coccolithophores | [Price et al., 1998]            | Price       |
| 18    | 0.36 | coccolithophores | [Parsons et al., 1961]          | Parsons     |
| 15    | 0.38 | coccolithophores | [Harris et al., 2005]           | Harris      |
| 15    | 0.62 | coccolithophores | [Harris et al., 2005]           | Harris      |
| 15    | 0.7  | coccolithophores | [Harris et al., 2005]           | Harris      |
| 15    | 0.82 | coccolithophores | [Harris et al., 2005]           | Harris      |
| 17    | 0.48 | coccolithophores | [Houdan et al., 2006]           | Houdan      |
| 17    | 0.4  | coccolithophores | [Houdan et al., 2006]           | Houdan      |

|      |       |                  |                              |                      |
|------|-------|------------------|------------------------------|----------------------|
| 17   | 0.78  | coccolithophores | [Houdan et al., 2005]        | Houdan               |
| 20   | 0.73  | coccolithophores | [W Sunda et al., 2002]       | Sunda                |
| 24   | 0.44  | coccolithophores | [Vairavamurthy et al., 1985] | Vairavamurthy        |
| 15   | 0.7   | coccolithophores | [Wolfe and Steinke, 1996]    | Wolfe                |
| 15   | 0.47  | coccolithophores | [Wolfe and Steinke, 1996]    | Wolfe                |
| 15   | 0.8   | coccolithophores | [Steinke et al., 1998]       | Steinke              |
| 15   | 0.72  | coccolithophores | [Steinke et al., 1998]       | Steinke              |
| 15   | 0.82  | coccolithophores | [Steinke et al., 1998]       | Steinke              |
| 15   | 0.67  | coccolithophores | [Steinke et al., 1998]       | Steinke              |
| 15   | 0.62  | coccolithophores | [Steinke et al., 1998]       | Steinke              |
| 15   | 0.82  | coccolithophores | [Steinke et al., 1998]       | Steinke              |
| 5    | 0.09  | coccolithophores | [Langer et al., 2007]        | Langer               |
| 11   | 0.39  | coccolithophores | [Langer et al., 2007]        | Langer               |
| 15   | 0.71  | coccolithophores | [Langer et al., 2007]        | Langer               |
| 20   | 1.16  | coccolithophores | [Langer et al., 2007]        | Langer               |
| 20   | 0.55  | coccolithophores | [Feng et al., 2008]          | Feng                 |
| 24   | 0.63  | coccolithophores | [Feng et al., 2008]          | Feng                 |
| 16   | 0.47  | coccolithophores | [Brand, 1982]                | Brand                |
| 26   | 0.7   | coccolithophores | [Brand, 1982]                | Brand                |
| 16   | 0.36  | coccolithophores | [Brand, 1982]                | Brand                |
| 24   | 0.3   | coccolithophores | [Brand and Guillard, 1981]   | Brand                |
| 24   | 0.81  | coccolithophores | [Brand and Guillard, 1981]   | Brand                |
| 24   | 0.72  | coccolithophores | [Brand and Guillard, 1981]   | Brand                |
| 24   | 0.75  | coccolithophores | [Brand and Guillard, 1981]   | Brand                |
| 10.5 | 0.75  | coccolithophores | [Varela and Harrison, 1999]  | Varela               |
| 17   | 1.9   | coccolithophores | [Price et al., 1998]         | Price                |
| 17   | 0.34  | coccolithophores | [Price et al., 1998]         | Price                |
| 17   | 0.69  | coccolithophores | [Price et al., 1998]         | Price                |
| 17   | 1.8   | coccolithophores | [Price et al., 1998]         | Price                |
| 17   | 0.76  | coccolithophores | [Price et al., 1998]         | Price                |
| 17   | 0.76  | coccolithophores | [Price et al., 1998]         | Price                |
| 17   | 0.86  | coccolithophores | [Price et al., 1998]         | Price                |
| 17   | 0.97  | coccolithophores | [Price et al., 1998]         | Price                |
| 17   | 0.48  | coccolithophores | [Price et al., 1998]         | Price                |
| 17   | 0.48  | coccolithophores | [Lecourt et al., 1996]       | Lecourt              |
| 15   | 1.1   | coccolithophores | [Buitenhuis et al., 1999]    | Buitenhuis           |
| 15   | 0.87  | coccolithophores | [Nielsen, 1997]              | Nielsen              |
| 20   | 1.61  | coccolithophores | [Paasche, 1999]              | Paasche              |
| 20   | 1.21  | coccolithophores | [Paasche, 1999]              | Paasche              |
| 17   | 0.42  | coccolithophores | [Lecourt et al., 1996]       | Lecourt              |
| 17   | 0.49  | coccolithophores | [Lecourt et al., 1996]       | Lecourt              |
| 12   | 0.046 | coccolithophores | S. Larsen this paper         | Larsen in prep. sal= |
| 11.9 | 0.336 | coccolithophores | S. Larsen this paper         | Larsen in prep. sal= |
| 12.2 | 0.132 | coccolithophores | S. Larsen this paper         | Larsen in prep. sal= |
| 15   | 0.674 | coccolithophores | S. Larsen this paper         | Larsen in prep. sal= |



|      |       |                  |                      |                      |
|------|-------|------------------|----------------------|----------------------|
| 16.1 | 0.598 | coccolithophores | S. Larsen this paper | Larsen in prep. sal= |
| 16.3 | 0.578 | coccolithophores | S. Larsen this paper | Larsen in prep. sal= |
| 17.3 | 0.914 | coccolithophores | S. Larsen this paper | Larsen in prep. sal= |
| 23   | 0.715 | coccolithophores | S. Larsen this paper | Larsen in prep. sal= |
| 24.1 | 0.605 | coccolithophores | S. Larsen this paper | Larsen in prep. sal= |
| 24.8 | 0.732 | coccolithophores | S. Larsen this paper | Larsen in prep. sal= |
| 25   | 0.482 | coccolithophores | S. Larsen this paper | Larsen in prep. sal= |
| 25.2 | 0.578 | coccolithophores | S. Larsen this paper | Larsen in prep. sal= |
| 25.6 | 0.091 | coccolithophores | S. Larsen this paper | Larsen in prep. sal= |
| 26.2 | 0     | coccolithophores | S. Larsen this paper | Larsen in prep. sal= |
| 26.2 | 0.425 | coccolithophores | S. Larsen this paper | Larsen in prep. sal= |
| 26.3 | 0.727 | coccolithophores | S. Larsen this paper | Larsen in prep. sal= |
| 27.3 | 0.19  | coccolithophores | S. Larsen this paper | Larsen in prep. sal= |
| 27.5 | 0.312 | coccolithophores | S. Larsen this paper | Larsen in prep. sal= |
| 27.8 | 0.35  | coccolithophores | S. Larsen this paper | Larsen in prep. sal= |
| 15.2 | 0.295 | coccolithophores | S. Larsen this paper | Larsen in prep. sal= |
| 15.1 | 0.348 | coccolithophores | S. Larsen this paper | Larsen in prep. sal= |
| 16.5 | 1.01  | coccolithophores | S. Larsen this paper | Larsen in prep. sal= |
| 19.8 | 0.845 | coccolithophores | S. Larsen this paper | Larsen in prep. sal= |
| 21.4 | 0.962 | coccolithophores | S. Larsen this paper | Larsen in prep. sal= |
| 21.6 | 0.958 | coccolithophores | S. Larsen this paper | Larsen in prep. sal= |
| 22.6 | 0.852 | coccolithophores | S. Larsen this paper | Larsen in prep. sal= |
| 24   | 0.782 | coccolithophores | S. Larsen this paper | Larsen in prep. sal= |
| 24   | 0.84  | coccolithophores | S. Larsen this paper | Larsen in prep. sal= |
| 24   | 0.766 | coccolithophores | S. Larsen this paper | Larsen in prep. sal= |
| 24.6 | 0.739 | coccolithophores | S. Larsen this paper | Larsen in prep. sal= |
| 25.1 | 0.492 | coccolithophores | S. Larsen this paper | Larsen in prep. sal= |
| 25.3 | 0.924 | coccolithophores | S. Larsen this paper | Larsen in prep. sal= |
| 25.8 | 0.691 | coccolithophores | S. Larsen this paper | Larsen in prep. sal= |
| 25.3 | 0.785 | coccolithophores | S. Larsen this paper | Larsen in prep. sal= |
| 26   | 0.67  | coccolithophores | S. Larsen this paper | Larsen in prep. sal= |
| 27   | 0.778 | coccolithophores | S. Larsen this paper | Larsen in prep. sal= |
| 28.2 | 0.473 | coccolithophores | S. Larsen this paper | Larsen in prep. sal= |
| 12.2 | 0.47  | coccolithophores | S. Larsen this paper | Larsen in prep. sal= |
| 13.5 | 0.42  | coccolithophores | S. Larsen this paper | Larsen in prep. sal= |
| 19.1 | 0.876 | coccolithophores | S. Larsen this paper | Larsen in prep. sal= |
| 21   | 0.886 | coccolithophores | S. Larsen this paper | Larsen in prep. sal= |
| 21.1 | 0.773 | coccolithophores | S. Larsen this paper | Larsen in prep. sal= |
| 23.2 | 0.962 | coccolithophores | S. Larsen this paper | Larsen in prep. sal= |
| 24.1 | 0.89  | coccolithophores | S. Larsen this paper | Larsen in prep. sal= |
| 24.7 | 0.859 | coccolithophores | S. Larsen this paper | Larsen in prep. sal= |
| 24.9 | 0.79  | coccolithophores | S. Larsen this paper | Larsen in prep. sal= |
| 25.6 | 0.715 | coccolithophores | S. Larsen this paper | Larsen in prep. sal= |
| 25.7 | 0.977 | coccolithophores | S. Larsen this paper | Larsen in prep. sal= |
| 26   | 0.559 | coccolithophores | S. Larsen this paper | Larsen in prep. sal= |

|      |        |                  |                      |                      |
|------|--------|------------------|----------------------|----------------------|
| 26.5 | 1.171  | coccolithophores | S. Larsen this paper | Larsen in prep. sal= |
| 26.6 | 0.682  | coccolithophores | S. Larsen this paper | Larsen in prep. sal= |
| 27   | 0.396  | coccolithophores | S. Larsen this paper | Larsen in prep. sal= |
| 28   | 0.185  | coccolithophores | S. Larsen this paper | Larsen in prep. sal= |
| 28.2 | 0.602  | coccolithophores | S. Larsen this paper | Larsen in prep. sal= |
| 28.6 | 0.046  | coccolithophores | S. Larsen this paper | Larsen in prep. sal= |
| 19.8 | 0.8459 | coccolithophores | S. Larsen this paper |                      |
| 21.4 | 0.9624 | coccolithophores | S. Larsen this paper |                      |
| 13.0 | 0.4024 | coccolithophores | S. Larsen this paper |                      |
| 21.4 | 0.9624 | coccolithophores | S. Larsen this paper |                      |
| 22.6 | 0.8508 | coccolithophores | S. Larsen this paper |                      |
| 24.0 | 0.7823 | coccolithophores | S. Larsen this paper |                      |
| 24.0 | 0.7653 | coccolithophores | S. Larsen this paper |                      |
| 24.6 | 0.7382 | coccolithophores | S. Larsen this paper |                      |
| 25.3 | 0.9234 | coccolithophores | S. Larsen this paper |                      |
| 25.8 | 0.6920 | coccolithophores | S. Larsen this paper |                      |
| 28.2 | 0.4723 | coccolithophores | S. Larsen this paper |                      |
| 15.2 | 0.2949 | coccolithophores | S. Larsen this paper |                      |
| 15.1 | 0.3470 | coccolithophores | S. Larsen this paper |                      |
| 21.6 | 0.9575 | coccolithophores | S. Larsen this paper |                      |
| 24.0 | 0.8404 | coccolithophores | S. Larsen this paper |                      |
| 25.1 | 0.4931 | coccolithophores | S. Larsen this paper |                      |
| 25.3 | 0.7845 | coccolithophores | S. Larsen this paper |                      |
| 26.0 | 0.6701 | coccolithophores | S. Larsen this paper |                      |
| 27.0 | 0.7782 | coccolithophores | S. Larsen this paper |                      |
| 29.3 | 0.2076 | coccolithophores | S. Larsen this paper |                      |
| 28.2 | 0.1747 | coccolithophores | S. Larsen this paper |                      |
| 26.5 | 0.6862 | coccolithophores | S. Larsen this paper |                      |
| 24.0 | 0.8492 | coccolithophores | S. Larsen this paper |                      |
| 16.3 | 0.5814 | coccolithophores | S. Larsen this paper |                      |
| 10.6 | 0.0678 | coccolithophores | S. Larsen this paper |                      |
| 28.3 | 0.0580 | coccolithophores | S. Larsen this paper |                      |
| 28.5 | 0.5740 | coccolithophores | S. Larsen this paper |                      |
| 27.0 | 0.5534 | coccolithophores | S. Larsen this paper |                      |
| 24.3 | 0.7056 | coccolithophores | S. Larsen this paper |                      |
| 19.3 | 0.6050 | coccolithophores | S. Larsen this paper |                      |
| 11.2 | 0.1324 | coccolithophores | S. Larsen this paper |                      |
| 28.7 | 0.3523 | coccolithophores | S. Larsen this paper |                      |
| 28.8 | 0.3838 | coccolithophores | S. Larsen this paper |                      |
| 27.2 | 0.6385 | coccolithophores | S. Larsen this paper |                      |
| 24.4 | 0.6242 | coccolithophores | S. Larsen this paper |                      |
| 20.2 | 1.0961 | coccolithophores | S. Larsen this paper |                      |
| 12.0 | 0.5724 | coccolithophores | S. Larsen this paper |                      |
| 28.8 | 0.4869 | coccolithophores | S. Larsen this paper |                      |
| 28.5 | 0.6829 | coccolithophores | S. Larsen this paper |                      |

|      |        |                  |                      |  |
|------|--------|------------------|----------------------|--|
| 27.0 | 0.6657 | coccolithophores | S. Larsen this paper |  |
| 24.4 | 0.5925 | coccolithophores | S. Larsen this paper |  |
| 20.3 | 0.8214 | coccolithophores | S. Larsen this paper |  |
| 12.5 | 0.2821 | coccolithophores | S. Larsen this paper |  |
| 29.0 | 0.3312 | coccolithophores | S. Larsen this paper |  |
| 28.2 | 0.3762 | coccolithophores | S. Larsen this paper |  |
| 26.7 | 0.6932 | coccolithophores | S. Larsen this paper |  |
| 24.3 | 1.0252 | coccolithophores | S. Larsen this paper |  |
| 20.3 | 0.7050 | coccolithophores | S. Larsen this paper |  |
| 13.4 | 0.1664 | coccolithophores | S. Larsen this paper |  |
| 28.6 | 0.0888 | coccolithophores | S. Larsen this paper |  |
| 27.7 | 0.5809 | coccolithophores | S. Larsen this paper |  |
| 23.9 | 0.8803 | coccolithophores | S. Larsen this paper |  |
| 20.2 | 0.8303 | coccolithophores | S. Larsen this paper |  |
| 13.2 | 0.2063 | coccolithophores | S. Larsen this paper |  |
| 28.7 | 0.1989 | coccolithophores | S. Larsen this paper |  |
| 25.8 | 0.7155 | coccolithophores | S. Larsen this paper |  |
| 23.5 | 0.9579 | coccolithophores | S. Larsen this paper |  |
| 19.9 | 1.0847 | coccolithophores | S. Larsen this paper |  |
| 13.6 | 0.4271 | coccolithophores | S. Larsen this paper |  |
| 29.6 | 0.6376 | coccolithophores | S. Larsen this paper |  |
| 27.0 | 0.1591 | coccolithophores | S. Larsen this paper |  |
| 25.4 | 0.4174 | coccolithophores | S. Larsen this paper |  |
| 22.8 | 0.7160 | coccolithophores | S. Larsen this paper |  |
| 19.4 | 1.0127 | coccolithophores | S. Larsen this paper |  |
| 13.6 | 0.3833 | coccolithophores | S. Larsen this paper |  |
| 28.7 | 0.3649 | coccolithophores | S. Larsen this paper |  |
| 26.5 | 0.5713 | coccolithophores | S. Larsen this paper |  |
| 24.9 | 0.6469 | coccolithophores | S. Larsen this paper |  |
| 22.4 | 0.6823 | coccolithophores | S. Larsen this paper |  |
| 18.7 | 0.6153 | coccolithophores | S. Larsen this paper |  |
| 12.1 | 0.5290 | coccolithophores | S. Larsen this paper |  |
| 28.5 | 0.4952 | coccolithophores | S. Larsen this paper |  |
| 26.0 | 0.7733 | coccolithophores | S. Larsen this paper |  |
| 24.1 | 0.6349 | coccolithophores | S. Larsen this paper |  |
| 22.3 | 0.6849 | coccolithophores | S. Larsen this paper |  |
| 18.4 | 0.7510 | coccolithophores | S. Larsen this paper |  |
| 11.4 | 0.2085 | coccolithophores | S. Larsen this paper |  |
| 25.4 | 0.7631 | coccolithophores | S. Larsen this paper |  |
| 23.2 | 0.7679 | coccolithophores | S. Larsen this paper |  |
| 20.4 | 0.7645 | coccolithophores | S. Larsen this paper |  |
| 16.4 | 0.7675 | coccolithophores | S. Larsen this paper |  |
| 17.7 | 0.8446 | coccolithophores | S. Larsen this paper |  |
| 10.1 | 0.1304 | coccolithophores | S. Larsen this paper |  |
| 26.5 | 0.4933 | coccolithophores | S. Larsen this paper |  |

|      |        |                         |                             |              |
|------|--------|-------------------------|-----------------------------|--------------|
| 24.0 | 0.5378 | coccolithophores        | S. Larsen this paper        |              |
| 21.7 | 0.7883 | coccolithophores        | S. Larsen this paper        |              |
| 17.5 | 0.8451 | coccolithophores        | S. Larsen this paper        |              |
| 9.5  | 0.1304 | coccolithophores        | S. Larsen this paper        |              |
| 13.5 | 0.1883 | coccolithophores        | S. Larsen this paper        |              |
| 25.5 | 0.3339 | coccolithophores        | S. Larsen this paper        |              |
| 25.0 | 0.3403 | coccolithophores        | S. Larsen this paper        |              |
| 13.3 | 0.4950 | coccolithophores        | S. Larsen this paper        |              |
| 19.0 | 0.7866 | coccolithophores        | S. Larsen this paper        |              |
| 23.1 | 0.8308 | coccolithophores        | S. Larsen this paper        |              |
| 24.0 | 0.3284 | coccolithophores        | S. Larsen this paper        |              |
| 25.4 | 0.2829 | coccolithophores        | S. Larsen this paper        |              |
| 26.1 | 0.4551 | coccolithophores        | S. Larsen this paper        |              |
| 27.3 | 0.6550 | coccolithophores        | S. Larsen this paper        |              |
| 11.2 | 0.2248 | coccolithophores        | S. Larsen this paper        |              |
| 20.4 | 0.7084 | coccolithophores        | S. Larsen this paper        |              |
| 18.3 | 0.7378 | coccolithophores        | S. Larsen this paper        |              |
| 17.8 | 0.8081 | coccolithophores        | S. Larsen this paper        |              |
| 25.1 | 0.5980 | coccolithophores        | S. Larsen this paper        |              |
| 27.1 | 0.7039 | coccolithophores        | S. Larsen this paper        |              |
| 12.8 | 0.2861 | coccolithophores        | S. Larsen this paper        |              |
| 27.2 | 0.2491 | coccolithophores        | S. Larsen this paper        |              |
| 13.4 | 0.3289 | coccolithophores        | S. Larsen this paper        |              |
| 11.0 | 0.2119 | coccolithophores        | S. Larsen this paper        |              |
| 11.4 | 0.1965 | coccolithophores        | S. Larsen this paper        |              |
| 12.9 | 0.1661 | coccolithophores        | S. Larsen this paper        |              |
| 13.2 | 0.1335 | coccolithophores        | S. Larsen this paper        |              |
| 13.7 | 0.2511 | coccolithophores        | S. Larsen this paper        |              |
| 13.4 | 0.2381 | coccolithophores        | S. Larsen this paper        |              |
| 13.4 | 0.2389 | coccolithophores        | S. Larsen this paper        |              |
| 12.2 | 0.2084 | coccolithophores        | S. Larsen this paper        |              |
| 11.3 | 0.06   | mixed-<br>phytoplankton | [Jensen and Moestrup, 1997] | Jensen, 1997 |
| 11.4 | 0.06   | mixed-<br>phytoplankton | [Jensen and Moestrup, 1997] | Jensen, 1997 |
| 16.3 | 0.15   | mixed-<br>phytoplankton | [Jensen and Moestrup, 1997] | Jensen, 1997 |
| 16.4 | 0.16   | mixed-<br>phytoplankton | [Jensen and Moestrup, 1997] | Jensen, 1997 |
| 20.3 | 0.22   | mixed-<br>phytoplankton | [Jensen and Moestrup, 1997] | Jensen, 1997 |
| 20.6 | 0.21   | mixed-<br>phytoplankton | [Jensen and Moestrup, 1997] | Jensen, 1997 |
| 8.5  | 0.12   | mixed-<br>phytoplankton | [Watras et al., 1982]       | Watras, 1982 |
| 8.5  | 0.18   | mixed-<br>phytoplankton | [Watras et al., 1982]       | Watras, 1982 |
| 8.5  | 0.2    | mixed-                  | [Watras et al., 1982]       | Watras, 1982 |

|      |       |                     |                                     |                                   |
|------|-------|---------------------|-------------------------------------|-----------------------------------|
|      |       | phytoplankton       |                                     |                                   |
| 8.5  | 0.214 | mixed-phytoplankton | [ <i>Watras et al., 1982</i> ]      | Watras, 1982                      |
| 8.5  | 0.223 | mixed-phytoplankton | [ <i>Watras et al., 1982</i> ]      | Watras, 1982                      |
| 10.5 | 0.22  | mixed-phytoplankton | [ <i>Watras et al., 1982</i> ]      | Watras, 1982                      |
| 10.5 | 0.24  | mixed-phytoplankton | [ <i>Watras et al., 1982</i> ]      | Watras, 1982                      |
| 10.5 | 0.26  | mixed-phytoplankton | [ <i>Watras et al., 1982</i> ]      | Watras, 1982                      |
| 13   | 0.28  | mixed-phytoplankton | [ <i>Watras et al., 1982</i> ]      | Watras, 1982                      |
| 13   | 0.342 | mixed-phytoplankton | [ <i>Watras et al., 1982</i> ]      | Watras, 1982                      |
| 13   | 0.382 | mixed-phytoplankton | [ <i>Watras et al., 1982</i> ]      | Watras, 1982                      |
| 13   | 0.402 | mixed-phytoplankton | [ <i>Watras et al., 1982</i> ]      | Watras, 1982                      |
| 13   | 0.42  | mixed-phytoplankton | [ <i>Watras et al., 1982</i> ]      | Watras, 1982                      |
| 16   | 0.322 | mixed-phytoplankton | [ <i>Watras et al., 1982</i> ]      | Watras, 1982                      |
| 16   | 0.361 | mixed-phytoplankton | [ <i>Watras et al., 1982</i> ]      | Watras, 1982                      |
| 16   | 0.369 | mixed-phytoplankton | [ <i>Watras et al., 1982</i> ]      | Watras, 1982                      |
| 16   | 0.42  | mixed-phytoplankton | [ <i>Watras et al., 1982</i> ]      | Watras, 1982                      |
| 18   | 0.341 | mixed-phytoplankton | [ <i>Watras et al., 1982</i> ]      | Watras, 1982                      |
| 18   | 0.36  | mixed-phytoplankton | [ <i>Watras et al., 1982</i> ]      | Watras, 1982                      |
| 18   | 0.402 | mixed-phytoplankton | [ <i>Watras et al., 1982</i> ]      | Watras, 1982                      |
| 18   | 0.44  | mixed-phytoplankton | [ <i>Watras et al., 1982</i> ]      | Watras, 1982                      |
| 20   | 0.38  | mixed-phytoplankton | [ <i>Watras et al., 1982</i> ]      | Watras, 1982                      |
| 20   | 0.44  | mixed-phytoplankton | [ <i>Watras et al., 1982</i> ]      | Watras, 1982                      |
| 20   | 0.475 | mixed-phytoplankton | [ <i>Watras et al., 1982</i> ]      | Watras, 1982                      |
| 20   | 0.48  | mixed-phytoplankton | [ <i>Watras et al., 1982</i> ]      | Watras, 1982                      |
| 15   | 0.15  | mixed-phytoplankton | [ <i>Meeson and Sweeney, 1982</i> ] | Meeson, B.W. & Sweeney, B.M. 1982 |
| 20   | 0.21  | mixed-phytoplankton | [ <i>Meeson and Sweeney, 1982</i> ] | Meeson, B.W. & Sweeney, B.M. 1982 |
| 15   | 0.15  | mixed-phytoplankton | [ <i>Meeson and Sweeney, 1982</i> ] | Meeson, B.W. & Sweeney, B.M. 1982 |
| 20   | 0.26  | mixed-phytoplankton | [ <i>Meeson and Sweeney, 1982</i> ] | Meeson, B.W. & Sweeney, B.M. 1982 |
| 4    | 0.25  | mixed-phytoplankton | [ <i>Lomas and Glibert, 1999</i> ]  | Lomas, M.W. & Glibert, P.M. 1999  |

|      |       |                     |                                |                                  |
|------|-------|---------------------|--------------------------------|----------------------------------|
| 10   | 0.45  | mixed-phytoplankton | [Lomas and Glibert, 1999]      | Lomas, M.W. & Glibert, P.M. 1999 |
| 20   | 0.95  | mixed-phytoplankton | [Lomas and Glibert, 1999]      | Lomas, M.W. & Glibert, P.M. 1999 |
| 15   | 0.08  | mixed-phytoplankton | [Lomas and Glibert, 1999]      | Lomas, M.W. & Glibert, P.M. 1999 |
| 20   | 0.58  | mixed-phytoplankton | [Lomas and Glibert, 1999]      | Lomas, M.W. & Glibert, P.M. 1999 |
| 8    | 0.3   | mixed-phytoplankton | [Aelion and Chisholm, 1985]    | Aelion, 1985                     |
| 11.4 | 0.425 | mixed-phytoplankton | [Aelion and Chisholm, 1985]    | Aelion, 1985                     |
| 16.4 | 0.54  | mixed-phytoplankton | [Aelion and Chisholm, 1985]    | Aelion, 1985                     |
| 18.8 | 0.59  | mixed-phytoplankton | [Aelion and Chisholm, 1985]    | Aelion, 1985                     |
| 21.1 | 0.625 | mixed-phytoplankton | [Aelion and Chisholm, 1985]    | Aelion, 1985                     |
| 16   | 0.11  | mixed-phytoplankton | [Karwath et al., 2000]         | Karwath, 2000                    |
| 17.8 | 0.13  | mixed-phytoplankton | [Karwath et al., 2000]         | Karwath, 2000                    |
| 19.7 | 0.15  | mixed-phytoplankton | [Karwath et al., 2000]         | Karwath, 2000                    |
| 21.6 | 0.16  | mixed-phytoplankton | [Karwath et al., 2000]         | Karwath, 2000                    |
| 23.4 | 0.16  | mixed-phytoplankton | [Karwath et al., 2000]         | Karwath, 2000                    |
| 25.1 | 0.18  | mixed-phytoplankton | [Karwath et al., 2000]         | Karwath, 2000                    |
| 27   | 0.21  | mixed-phytoplankton | [Karwath et al., 2000]         | Karwath, 2000                    |
| 7    | 0.17  | mixed-phytoplankton | [Nielsen, 1996]                | Nielsen, 1996                    |
| 10   | 0.25  | mixed-phytoplankton | [Nielsen, 1996]                | Nielsen, 1996                    |
| 15   | 0.45  | mixed-phytoplankton | [Nielsen, 1996]                | Nielsen, 1996                    |
| 20   | 0.57  | mixed-phytoplankton | [Nielsen, 1996]                | Nielsen, 1996                    |
| 12.3 | 0.44  | mixed-phytoplankton | [Eppley and Coatswor.JI, 1966] | Eppley, 1966                     |
| 16   | 0.94  | mixed-phytoplankton | [Eppley and Coatswor.JI, 1966] | Eppley, 1966                     |
| 19.5 | 1.10  | mixed-phytoplankton | [Eppley and Coatswor.JI, 1966] | Eppley, 1966                     |
| 20   | 1.23  | mixed-phytoplankton | [Eppley and Coatswor.JI, 1966] | Eppley, 1966                     |
| 21   | 1.32  | mixed-phytoplankton | [Eppley and Coatswor.JI, 1966] | Eppley, 1966                     |
| 25   | 1.61  | mixed-phytoplankton | [Eppley and Coatswor.JI, 1966] | Eppley, 1966                     |
| 24   | 1.18  | mixed-phytoplankton | [Morris and Glover, 1974]      | Morris, I. & Glover, H.E. 1974   |
| 18   | 1.11  | mixed-              | [Morris and Glover, 1974]      | Morris, I. & Glover, H.E. 1974   |

|      |       |                     |                                         |                                |
|------|-------|---------------------|-----------------------------------------|--------------------------------|
|      |       | phytoplankton       |                                         |                                |
| 12   | 0.49  | mixed-phytoplankton | [ <i>Morris and Glover, 1974</i> ]      | Morris, I. & Glover, H.E. 1974 |
| 9    | 0.46  | mixed-phytoplankton | [ <i>Montagnes and Franklin, 2001</i> ] | Montagnes, 2001                |
| 9    | 0.52  | mixed-phytoplankton | [ <i>Montagnes and Franklin, 2001</i> ] | Montagnes, 2001                |
| 9    | 0.45  | mixed-phytoplankton | [ <i>Montagnes and Franklin, 2001</i> ] | Montagnes, 2001                |
| 13   | 0.81  | mixed-phytoplankton | [ <i>Montagnes and Franklin, 2001</i> ] | Montagnes, 2001                |
| 13   | 0.68  | mixed-phytoplankton | [ <i>Montagnes and Franklin, 2001</i> ] | Montagnes, 2001                |
| 13   | 0.74  | mixed-phytoplankton | [ <i>Montagnes and Franklin, 2001</i> ] | Montagnes, 2001                |
| 16   | 0.70  | mixed-phytoplankton | [ <i>Montagnes and Franklin, 2001</i> ] | Montagnes, 2001                |
| 16   | 0.87  | mixed-phytoplankton | [ <i>Montagnes and Franklin, 2001</i> ] | Montagnes, 2001                |
| 16   | 1.12  | mixed-phytoplankton | [ <i>Montagnes and Franklin, 2001</i> ] | Montagnes, 2001                |
| 13   | 0.60  | mixed-phytoplankton | [ <i>Montagnes and Franklin, 2001</i> ] | Montagnes, 2001                |
| 13   | 0.62  | mixed-phytoplankton | [ <i>Montagnes and Franklin, 2001</i> ] | Montagnes, 2001                |
| 13   | 0.66  | mixed-phytoplankton | [ <i>Montagnes and Franklin, 2001</i> ] | Montagnes, 2001                |
| 16   | 0.71  | mixed-phytoplankton | [ <i>Montagnes and Franklin, 2001</i> ] | Montagnes, 2001                |
| 16   | 0.68  | mixed-phytoplankton | [ <i>Montagnes and Franklin, 2001</i> ] | Montagnes, 2001                |
| 16   | 0.65  | mixed-phytoplankton | [ <i>Montagnes and Franklin, 2001</i> ] | Montagnes, 2001                |
| 20   | 0.76  | mixed-phytoplankton | [ <i>Montagnes and Franklin, 2001</i> ] | Montagnes, 2001                |
| 20   | 0.66  | mixed-phytoplankton | [ <i>Montagnes and Franklin, 2001</i> ] | Montagnes, 2001                |
| 20   | 0.66  | mixed-phytoplankton | [ <i>Montagnes and Franklin, 2001</i> ] | Montagnes, 2001                |
| 25   | 0.63  | mixed-phytoplankton | [ <i>Montagnes and Franklin, 2001</i> ] | Montagnes, 2001                |
| 25   | 0.81  | mixed-phytoplankton | [ <i>Montagnes and Franklin, 2001</i> ] | Montagnes, 2001                |
| 25   | 0.71  | mixed-phytoplankton | [ <i>Montagnes and Franklin, 2001</i> ] | Montagnes, 2001                |
| -1.5 | 0.77  | mixed-phytoplankton |                                         | Choi, J.W. & Peters, F 1992    |
| 12   | 0.477 | mixed-phytoplankton | [ <i>Sosik and Mitchell, 1994</i> ]     | Sosik, 1994                    |
| 12   | 0.538 | mixed-phytoplankton | [ <i>Sosik and Mitchell, 1994</i> ]     | Sosik, 1994                    |
| 16   | 0.991 | mixed-phytoplankton | [ <i>Sosik and Mitchell, 1994</i> ]     | Sosik, 1994                    |
| 16   | 0.996 | mixed-phytoplankton | [ <i>Sosik and Mitchell, 1994</i> ]     | Sosik, 1994                    |

|      |      |                     |                            |                       |
|------|------|---------------------|----------------------------|-----------------------|
| 18   | 1.15 | mixed-phytoplankton | [Sosik and Mitchell, 1994] | Sosik, 1994           |
| 18   | 1.17 | mixed-phytoplankton | [Sosik and Mitchell, 1994] | Sosik, 1994           |
| 28   | 2.19 | mixed-phytoplankton | [Sosik and Mitchell, 1994] | Sosik, 1994           |
| 28   | 2.24 | mixed-phytoplankton | [Sosik and Mitchell, 1994] | Sosik, 1994           |
| -1.7 | 0.7  | <i>Phaeocystis</i>  | [Schoemann et al., 2005]   | digitised from Fig. 3 |
| 0.0  | 0.7  | <i>Phaeocystis</i>  | [Schoemann et al., 2005]   | digitised from Fig. 3 |
| 0.0  | 0.4  | <i>Phaeocystis</i>  | [Schoemann et al., 2005]   | digitised from Fig. 3 |
| 0.0  | 0.3  | <i>Phaeocystis</i>  | [Schoemann et al., 2005]   | digitised from Fig. 3 |
| 0.0  | 0.3  | <i>Phaeocystis</i>  | [Schoemann et al., 2005]   | digitised from Fig. 3 |
| 1.8  | 0.1  | <i>Phaeocystis</i>  | [Schoemann et al., 2005]   | digitised from Fig. 3 |
| 1.8  | 0.4  | <i>Phaeocystis</i>  | [Schoemann et al., 2005]   | digitised from Fig. 3 |
| 1.8  | 0.5  | <i>Phaeocystis</i>  | [Schoemann et al., 2005]   | digitised from Fig. 3 |
| 1.8  | 0.6  | <i>Phaeocystis</i>  | [Schoemann et al., 2005]   | digitised from Fig. 3 |
| 1.3  | 0.7  | <i>Phaeocystis</i>  | [Schoemann et al., 2005]   | digitised from Fig. 3 |
| 0.9  | 1.1  | <i>Phaeocystis</i>  | [Schoemann et al., 2005]   | digitised from Fig. 3 |
| 3.9  | 1.5  | <i>Phaeocystis</i>  | [Schoemann et al., 2005]   | digitised from Fig. 3 |
| 3.9  | 1.1  | <i>Phaeocystis</i>  | [Schoemann et al., 2005]   | digitised from Fig. 3 |
| 3.9  | 0.9  | <i>Phaeocystis</i>  | [Schoemann et al., 2005]   | digitised from Fig. 3 |
| 3.9  | 0.5  | <i>Phaeocystis</i>  | [Schoemann et al., 2005]   | digitised from Fig. 3 |
| 3.9  | 0.5  | <i>Phaeocystis</i>  | [Schoemann et al., 2005]   | digitised from Fig. 3 |
| 3.9  | 0.3  | <i>Phaeocystis</i>  | [Schoemann et al., 2005]   | digitised from Fig. 3 |
| 4.8  | 0.9  | <i>Phaeocystis</i>  | [Schoemann et al., 2005]   | digitised from Fig. 3 |
| 4.8  | 0.7  | <i>Phaeocystis</i>  | [Schoemann et al., 2005]   | digitised from Fig. 3 |
| 5.2  | 0.7  | <i>Phaeocystis</i>  | [Schoemann et al., 2005]   | digitised from Fig. 3 |
| 5.9  | 0.6  | <i>Phaeocystis</i>  | [Schoemann et al., 2005]   | digitised from Fig. 3 |
| 5.7  | 0.7  | <i>Phaeocystis</i>  | [Schoemann et al., 2005]   | digitised from Fig. 3 |
| 5.9  | 0.9  | <i>Phaeocystis</i>  | [Schoemann et al., 2005]   | digitised from Fig. 3 |
| 5.9  | 0.9  | <i>Phaeocystis</i>  | [Schoemann et al., 2005]   | digitised from Fig. 3 |
| 6.8  | 0.9  | <i>Phaeocystis</i>  | [Schoemann et al., 2005]   | digitised from Fig. 3 |
| 6.8  | 0.8  | <i>Phaeocystis</i>  | [Schoemann et al., 2005]   | digitised from Fig. 3 |
| 6.8  | 0.6  | <i>Phaeocystis</i>  | [Schoemann et al., 2005]   | digitised from Fig. 3 |
| 6.8  | 0.5  | <i>Phaeocystis</i>  | [Schoemann et al., 2005]   | digitised from Fig. 3 |
| 7.4  | 1.0  | <i>Phaeocystis</i>  | [Schoemann et al., 2005]   | digitised from Fig. 3 |
| 7.9  | 1.0  | <i>Phaeocystis</i>  | [Schoemann et al., 2005]   | digitised from Fig. 3 |
| 9.9  | 0.6  | <i>Phaeocystis</i>  | [Schoemann et al., 2005]   | digitised from Fig. 3 |
| 9.9  | 0.7  | <i>Phaeocystis</i>  | [Schoemann et al., 2005]   | digitised from Fig. 3 |
| 9.9  | 0.9  | <i>Phaeocystis</i>  | [Schoemann et al., 2005]   | digitised from Fig. 3 |
| 9.9  | 1.0  | <i>Phaeocystis</i>  | [Schoemann et al., 2005]   | digitised from Fig. 3 |
| 9.9  | 1.1  | <i>Phaeocystis</i>  | [Schoemann et al., 2005]   | digitised from Fig. 3 |
| 9.3  | 1.2  | <i>Phaeocystis</i>  | [Schoemann et al., 2005]   | digitised from Fig. 3 |
| 9.9  | 1.2  | <i>Phaeocystis</i>  | [Schoemann et al., 2005]   | digitised from Fig. 3 |
| 9.9  | 1.3  | <i>Phaeocystis</i>  | [Schoemann et al., 2005]   | digitised from Fig. 3 |



|      |       |                    |                                 |                                |
|------|-------|--------------------|---------------------------------|--------------------------------|
| 11.8 | 0.8   | <i>Phaeocystis</i> | [Schoemann et al., 2005]        | digitised from Fig. 3          |
| 11.8 | 0.9   | <i>Phaeocystis</i> | [Schoemann et al., 2005]        | digitised from Fig. 3          |
| 11.8 | 1.0   | <i>Phaeocystis</i> | [Schoemann et al., 2005]        | digitised from Fig. 3          |
| 11.8 | 1.0   | <i>Phaeocystis</i> | [Schoemann et al., 2005]        | digitised from Fig. 3          |
| 11.7 | 1.1   | <i>Phaeocystis</i> | [Schoemann et al., 2005]        | digitised from Fig. 3          |
| 11.7 | 1.2   | <i>Phaeocystis</i> | [Schoemann et al., 2005]        | digitised from Fig. 3          |
| 11.7 | 1.2   | <i>Phaeocystis</i> | [Schoemann et al., 2005]        | digitised from Fig. 3          |
| 12.8 | 0.7   | <i>Phaeocystis</i> | [Schoemann et al., 2005]        | digitised from Fig. 3          |
| 13.8 | 1.2   | <i>Phaeocystis</i> | [Schoemann et al., 2005]        | digitised from Fig. 3          |
| 13.8 | 1.4   | <i>Phaeocystis</i> | [Schoemann et al., 2005]        | digitised from Fig. 3          |
| 13.8 | 1.8   | <i>Phaeocystis</i> | [Schoemann et al., 2005]        | digitised from Fig. 3          |
| 14.9 | 2.1   | <i>Phaeocystis</i> | [Schoemann et al., 2005]        | digitised from Fig. 3          |
| 14.8 | 2.8   | <i>Phaeocystis</i> | [Schoemann et al., 2005]        | digitised from Fig. 3          |
| 17.8 | 1.6   | <i>Phaeocystis</i> | [Schoemann et al., 2005]        | digitised from Fig. 3          |
| 17.8 | 1.3   | <i>Phaeocystis</i> | [Schoemann et al., 2005]        | digitised from Fig. 3          |
| 19.9 | 0.2   | <i>Phaeocystis</i> | [Schoemann et al., 2005]        | digitised from Fig. 3          |
| 19.9 | 0.3   | <i>Phaeocystis</i> | [Schoemann et al., 2005]        | digitised from Fig. 3          |
| 19.9 | 1.1   | <i>Phaeocystis</i> | [Schoemann et al., 2005]        | digitised from Fig. 3          |
| 19.9 | 1.4   | <i>Phaeocystis</i> | [Schoemann et al., 2005]        | digitised from Fig. 3          |
| 19.9 | 1.6   | <i>Phaeocystis</i> | [Schoemann et al., 2005]        | digitised from Fig. 3          |
| 19.9 | 1.7   | <i>Phaeocystis</i> | [Schoemann et al., 2005]        | digitised from Fig. 3          |
| 19.9 | 2.1   | <i>Phaeocystis</i> | [Schoemann et al., 2005]        | digitised from Fig. 3          |
| 19.8 | 2.2   | <i>Phaeocystis</i> | [Schoemann et al., 2005]        | digitised from Fig. 3          |
| 19.8 | 2.3   | <i>Phaeocystis</i> | [Schoemann et al., 2005]        | digitised from Fig. 3          |
| 21.7 | 0.8   | <i>Phaeocystis</i> | [Schoemann et al., 2005]        | digitised from Fig. 3          |
| 24.9 | 0.3   | <i>Phaeocystis</i> | [Schoemann et al., 2005]        | digitised from Fig. 3          |
| 24.9 | 0.3   | <i>Phaeocystis</i> | [Schoemann et al., 2005]        | digitised from Fig. 3          |
| 29.9 | 0.3   | <i>Phaeocystis</i> | [Schoemann et al., 2005]        | digitised from Fig. 3          |
| 29.9 | 0.1   | <i>Phaeocystis</i> | [Schoemann et al., 2005]        | digitised from Fig. 3          |
| 7    | 0.693 | diatoms            | [Jørgensen, 1968]               | {Jorgensen, 1968 #52}          |
| 15   | 1.317 | diatoms            | [Jørgensen, 1968]               | {Jorgensen, 1968 #52}          |
| 20   | 1.594 | diatoms            | [Jørgensen, 1968]               | {Jorgensen, 1968 #52}          |
| 20   | 0.550 | diatoms            | [Blasco et al., 1982]           | Blasco et al., 1982            |
| 20   | 0.620 | diatoms            | [Blasco et al., 1982]           | Blasco et al., 1982            |
| 20   | 1.010 | diatoms            | [Blasco et al., 1982]           | Blasco et al., 1982            |
| 15   | 2.100 | diatoms            | [Burkhardt and Riebesell, 1997] | Burkhardt and Riebesell - 1997 |
| 15   | 0.341 | diatoms            | [Burkhardt et al., 1999]        | Burkhardt et al. - 1999        |
| 15   | 0.527 | diatoms            | [Burkhardt et al., 1999]        | Burkhardt et al. - 1999        |
| 15   | 0.863 | diatoms            | [Burkhardt et al., 1999]        | Burkhardt et al. - 1999        |
| 15   | 0.893 | diatoms            | [Burkhardt et al., 1999]        | Burkhardt et al. - 1999        |
| 15   | 1.381 | diatoms            | [Burkhardt et al., 1999]        | Burkhardt et al. - 1999        |
| 15   | 1.525 | diatoms            | [Burkhardt et al., 1999]        | Burkhardt et al. - 1999        |
| 15   | 1.553 | diatoms            | [Burkhardt et al., 1999]        | Burkhardt et al. - 1999        |
| 15   | 1.625 | diatoms            | [Burkhardt et al., 1999]        | Burkhardt et al. - 1999        |
| 15   | 1.672 | diatoms            | [Burkhardt et al., 1999]        | Burkhardt et al. - 1999        |

|    |       |         |                                      |                              |
|----|-------|---------|--------------------------------------|------------------------------|
| 15 | 1.770 | diatoms | [Burkhardt et al., 1999]             | Burkhardt et al. - 1999      |
| 15 | 1.821 | diatoms | [Burkhardt et al., 1999]             | Burkhardt et al. - 1999      |
| 15 | 2.059 | diatoms | [Burkhardt et al., 1999]             | Burkhardt et al. - 1999      |
| 8  | 0.364 | diatoms | [El-Sabaawi and Harrison, 2006]      | El Sabaawi and Harrison_2006 |
| 8  | 0.500 | diatoms | [El-Sabaawi and Harrison, 2006]      | El Sabaawi and Harrison_2006 |
| 8  | 0.652 | diatoms | [El-Sabaawi and Harrison, 2006]      | El Sabaawi and Harrison_2006 |
| 8  | 0.811 | diatoms | [El-Sabaawi and Harrison, 2006]      | El Sabaawi and Harrison_2006 |
| 10 | 0.545 | diatoms | [El-Sabaawi and Harrison, 2006]      | El Sabaawi and Harrison_2006 |
| 10 | 0.712 | diatoms | [El-Sabaawi and Harrison, 2006]      | El Sabaawi and Harrison_2006 |
| 10 | 0.727 | diatoms | [El-Sabaawi and Harrison, 2006]      | El Sabaawi and Harrison_2006 |
| 10 | 0.879 | diatoms | [El-Sabaawi and Harrison, 2006]      | El Sabaawi and Harrison_2006 |
| 14 | 0.583 | diatoms | [El-Sabaawi and Harrison, 2006]      | El Sabaawi and Harrison_2006 |
| 14 | 0.758 | diatoms | [El-Sabaawi and Harrison, 2006]      | El Sabaawi and Harrison_2006 |
| 14 | 0.833 | diatoms | [El-Sabaawi and Harrison, 2006]      | El Sabaawi and Harrison_2006 |
| 14 | 0.955 | diatoms | [El-Sabaawi and Harrison, 2006]      | El Sabaawi and Harrison_2006 |
| 17 | 0.409 | diatoms | [El-Sabaawi and Harrison, 2006]      | El Sabaawi and Harrison_2006 |
| 17 | 0.727 | diatoms | [El-Sabaawi and Harrison, 2006]      | El Sabaawi and Harrison_2006 |
| 17 | 0.788 | diatoms | [El-Sabaawi and Harrison, 2006]      | El Sabaawi and Harrison_2006 |
| 17 | 0.894 | diatoms | [El-Sabaawi and Harrison, 2006]      | El Sabaawi and Harrison_2006 |
| 20 | 0.000 | diatoms | [El-Sabaawi and Harrison, 2006]      | El Sabaawi and Harrison_2006 |
| 20 | 0.212 | diatoms | [El-Sabaawi and Harrison, 2006]      | El Sabaawi and Harrison_2006 |
| 20 | 0.500 | diatoms | [El-Sabaawi and Harrison, 2006]      | El Sabaawi and Harrison_2006 |
| 20 | 0.576 | diatoms | [El-Sabaawi and Harrison, 2006]      | El Sabaawi and Harrison_2006 |
| 20 | 0.360 | diatoms | [R. W. Eppley and P. R. Sloan, 1966] | Eppley and Sloan, 1966       |
| 20 | 0.480 | diatoms | [R. W. Eppley and P. R. Sloan, 1966] | Eppley and Sloan, 1966       |
| 20 | 0.720 | diatoms | [Goldman et al., 1992]               | Goldman et al. - 1992        |
| 20 | 0.870 | diatoms | [Goldman et al., 1992]               | Goldman et al. - 1992        |
| 20 | 1.120 | diatoms | [Goldman et al., 1992]               | Goldman et al. - 1992        |
| 20 | 1.536 | diatoms | [Harrison and Morel, 1986]           | Harrison and Morel - 1996    |
| 10 | 1.109 | diatoms | [Jørgensen, 1968]                    | Jorgensen, 1968              |
| 0  | 0.320 | diatoms | [Karsten et al., 2006]               | Karsten 2006                 |
| 0  | 0.320 | diatoms | [Karsten et al., 2006]               | Karsten 2006                 |

|    |       |         |                           |                                  |
|----|-------|---------|---------------------------|----------------------------------|
| 0  | 0.340 | diatoms | [Karsten et al., 2006]    | Karsten 2006                     |
| 0  | 0.340 | diatoms | [Karsten et al., 2006]    | Karsten 2006                     |
| 0  | 0.340 | diatoms | [Karsten et al., 2006]    | Karsten 2006                     |
| 0  | 0.347 | diatoms | [Karsten et al., 2006]    | Karsten 2006                     |
| 0  | 0.356 | diatoms | [Karsten et al., 2006]    | Karsten 2006                     |
| 0  | 0.358 | diatoms | [Karsten et al., 2006]    | Karsten 2006                     |
| 0  | 0.368 | diatoms | [Karsten et al., 2006]    | Karsten 2006                     |
| 0  | 0.379 | diatoms | [Karsten et al., 2006]    | Karsten 2006                     |
| 5  | 0.400 | diatoms | [Karsten et al., 2006]    | Karsten 2006                     |
| 5  | 0.460 | diatoms | [Karsten et al., 2006]    | Karsten 2006                     |
| 5  | 0.463 | diatoms | [Karsten et al., 2006]    | Karsten 2006                     |
| 5  | 0.491 | diatoms | [Karsten et al., 2006]    | Karsten 2006                     |
| 5  | 0.500 | diatoms | [Karsten et al., 2006]    | Karsten 2006                     |
| 5  | 0.537 | diatoms | [Karsten et al., 2006]    | Karsten 2006                     |
| 5  | 0.539 | diatoms | [Karsten et al., 2006]    | Karsten 2006                     |
| 5  | 0.560 | diatoms | [Karsten et al., 2006]    | Karsten 2006                     |
| 5  | 0.560 | diatoms | [Karsten et al., 2006]    | Karsten 2006                     |
| 5  | 0.587 | diatoms | [Karsten et al., 2006]    | Karsten 2006                     |
| 10 | 0.511 | diatoms | [Karsten et al., 2006]    | Karsten 2006                     |
| 10 | 0.649 | diatoms | [Karsten et al., 2006]    | Karsten 2006                     |
| 10 | 0.680 | diatoms | [Karsten et al., 2006]    | Karsten 2006                     |
| 10 | 0.767 | diatoms | [Karsten et al., 2006]    | Karsten 2006                     |
| 10 | 0.826 | diatoms | [Karsten et al., 2006]    | Karsten 2006                     |
| 10 | 0.905 | diatoms | [Karsten et al., 2006]    | Karsten 2006                     |
| 10 | 0.940 | diatoms | [Karsten et al., 2006]    | Karsten 2006                     |
| 10 | 1.120 | diatoms | [Karsten et al., 2006]    | Karsten 2006                     |
| 10 | 1.160 | diatoms | [Karsten et al., 2006]    | Karsten 2006                     |
| 10 | 1.200 | diatoms | [Karsten et al., 2006]    | Karsten 2006                     |
| 15 | 0.511 | diatoms | [Karsten et al., 2006]    | Karsten 2006                     |
| 15 | 0.649 | diatoms | [Karsten et al., 2006]    | Karsten 2006                     |
| 15 | 0.680 | diatoms | [Karsten et al., 2006]    | Karsten 2006                     |
| 15 | 0.846 | diatoms | [Karsten et al., 2006]    | Karsten 2006                     |
| 15 | 0.940 | diatoms | [Karsten et al., 2006]    | Karsten 2006                     |
| 15 | 0.944 | diatoms | [Karsten et al., 2006]    | Karsten 2006                     |
| 15 | 0.984 | diatoms | [Karsten et al., 2006]    | Karsten 2006                     |
| 15 | 1.120 | diatoms | [Karsten et al., 2006]    | Karsten 2006                     |
| 15 | 1.160 | diatoms | [Karsten et al., 2006]    | Karsten 2006                     |
| 15 | 1.240 | diatoms | [Karsten et al., 2006]    | Karsten 2006                     |
| 20 | 1.700 | diatoms | [Kudo et al., 2000]       | Kudo et al. - 2000               |
| 10 | 1.070 | diatoms | [Kudo et al., 2000]       | Kudo, I. et al. 2000             |
| 2  | 0.000 | diatoms | [Lomas and Glibert, 1999] | Lomas, M.W. & Glibert, P.M. 1999 |
| 4  | 0.420 | diatoms | [Lomas and Glibert, 1999] | Lomas, M.W. & Glibert, P.M. 1999 |
| 10 | 0.540 | diatoms | [Lomas and Glibert, 1999] | Lomas, M.W. & Glibert, P.M. 1999 |
| 20 | 1.220 | diatoms | [Lomas and Glibert, 1999] | Lomas, M.W. & Glibert, P.M. 1999 |
| 10 | 0.430 | diatoms | [Lomas and Glibert, 1999] | Lomas, M.W. & Glibert, P.M.      |

|      |       |         |                                         |                                  |
|------|-------|---------|-----------------------------------------|----------------------------------|
|      |       |         |                                         | 1999                             |
| 20   | 1.060 | diatoms | [ <i>Lomas and Glibert, 1999</i> ]      | Lomas, M.W. & Glibert, P.M. 1999 |
| 20   | 0.800 | diatoms | [ <i>Maldonado and Price, 1996</i> ]    | Maldonado and Price - 1996       |
| 20   | 1.100 | diatoms | [ <i>Maldonado and Price, 1996</i> ]    | Maldonado and Price - 1996       |
| 20   | 1.100 | diatoms | [ <i>Maldonado and Price, 1996</i> ]    | Maldonado and Price - 1996       |
| 20   | 1.200 | diatoms | [ <i>Maldonado and Price, 1996</i> ]    | Maldonado and Price - 1996       |
| 20   | 1.200 | diatoms | [ <i>Maldonado and Price, 1996</i> ]    | Maldonado and Price - 1996       |
| 20   | 1.400 | diatoms | [ <i>Maldonado and Price, 1996</i> ]    | Maldonado and Price - 1996       |
| 20   | 1.400 | diatoms | [ <i>Maldonado and Price, 1996</i> ]    | Maldonado and Price - 1996       |
| 20   | 1.400 | diatoms | [ <i>Maldonado and Price, 1996</i> ]    | Maldonado and Price - 1996       |
| 20   | 1.400 | diatoms | [ <i>Maldonado and Price, 1996</i> ]    | Maldonado and Price - 1996       |
| 20   | 1.500 | diatoms | [ <i>Maldonado and Price, 1996</i> ]    | Maldonado and Price - 1996       |
| 20   | 1.900 | diatoms | [ <i>Maldonado and Price, 1996</i> ]    | Maldonado and Price - 1996       |
| 20   | 2.200 | diatoms | [ <i>Maldonado and Price, 1996</i> ]    | Maldonado and Price - 1996       |
| 18.5 | 0.850 | diatoms | [ <i>Milligan and Harrison, 2000</i> ]  | Milligan and Harrison - 2000     |
| 8    | 0.114 | diatoms | [ <i>Montagnes and Franklin, 2001</i> ] | Montagnes, 2001                  |
| 8    | 0.132 | diatoms | [ <i>Montagnes and Franklin, 2001</i> ] | Montagnes, 2001                  |
| 8    | 0.161 | diatoms | [ <i>Montagnes and Franklin, 2001</i> ] | Montagnes, 2001                  |
| 8    | 0.405 | diatoms | [ <i>Montagnes and Franklin, 2001</i> ] | Montagnes, 2001                  |
| 8    | 0.422 | diatoms | [ <i>Montagnes and Franklin, 2001</i> ] | Montagnes, 2001                  |
| 8    | 0.444 | diatoms | [ <i>Montagnes and Franklin, 2001</i> ] | Montagnes, 2001                  |
| 8    | 0.513 | diatoms | [ <i>Montagnes and Franklin, 2001</i> ] | Montagnes, 2001                  |
| 9    | 0.290 | diatoms | [ <i>Montagnes and Franklin, 2001</i> ] | Montagnes, 2001                  |
| 9    | 0.357 | diatoms | [ <i>Montagnes and Franklin, 2001</i> ] | Montagnes, 2001                  |
| 9    | 0.371 | diatoms | [ <i>Montagnes and Franklin, 2001</i> ] | Montagnes, 2001                  |
| 9    | 0.420 | diatoms | [ <i>Montagnes and Franklin, 2001</i> ] | Montagnes, 2001                  |
| 9    | 0.455 | diatoms | [ <i>Montagnes and Franklin, 2001</i> ] | Montagnes, 2001                  |
| 9    | 0.468 | diatoms | [ <i>Montagnes and Franklin, 2001</i> ] | Montagnes, 2001                  |
| 9    | 0.514 | diatoms | [ <i>Montagnes and Franklin, 2001</i> ] | Montagnes, 2001                  |
| 9    | 0.523 | diatoms | [ <i>Montagnes and Franklin, 2001</i> ] | Montagnes, 2001                  |
| 9    | 0.562 | diatoms | [ <i>Montagnes and Franklin, 2001</i> ] | Montagnes, 2001                  |
| 9    | 0.580 | diatoms | [ <i>Montagnes and Franklin, 2001</i> ] | Montagnes, 2001                  |
| 10   | 0.437 | diatoms | [ <i>Montagnes and Franklin, 2001</i> ] | Montagnes, 2001                  |
| 10   | 0.448 | diatoms | [ <i>Montagnes and Franklin,</i>        | Montagnes, 2001                  |

|    |       |         |                                         |                 |
|----|-------|---------|-----------------------------------------|-----------------|
|    |       |         | 2001]                                   |                 |
| 10 | 0.457 | diatoms | [ <i>Montagnes and Franklin, 2001</i> ] | Montagnes, 2001 |
| 12 | 0.543 | diatoms | [ <i>Montagnes and Franklin, 2001</i> ] | Montagnes, 2001 |
| 12 | 0.632 | diatoms | [ <i>Montagnes and Franklin, 2001</i> ] | Montagnes, 2001 |
| 12 | 0.693 | diatoms | [ <i>Montagnes and Franklin, 2001</i> ] | Montagnes, 2001 |
| 13 | 0.243 | diatoms | [ <i>Montagnes and Franklin, 2001</i> ] | Montagnes, 2001 |
| 13 | 0.273 | diatoms | [ <i>Montagnes and Franklin, 2001</i> ] | Montagnes, 2001 |
| 13 | 0.329 | diatoms | [ <i>Montagnes and Franklin, 2001</i> ] | Montagnes, 2001 |
| 13 | 0.340 | diatoms | [ <i>Montagnes and Franklin, 2001</i> ] | Montagnes, 2001 |
| 13 | 0.390 | diatoms | [ <i>Montagnes and Franklin, 2001</i> ] | Montagnes, 2001 |
| 13 | 0.398 | diatoms | [ <i>Montagnes and Franklin, 2001</i> ] | Montagnes, 2001 |
| 13 | 0.409 | diatoms | [ <i>Montagnes and Franklin, 2001</i> ] | Montagnes, 2001 |
| 13 | 0.442 | diatoms | [ <i>Montagnes and Franklin, 2001</i> ] | Montagnes, 2001 |
| 13 | 0.519 | diatoms | [ <i>Montagnes and Franklin, 2001</i> ] | Montagnes, 2001 |
| 13 | 0.521 | diatoms | [ <i>Montagnes and Franklin, 2001</i> ] | Montagnes, 2001 |
| 13 | 0.553 | diatoms | [ <i>Montagnes and Franklin, 2001</i> ] | Montagnes, 2001 |
| 13 | 0.577 | diatoms | [ <i>Montagnes and Franklin, 2001</i> ] | Montagnes, 2001 |
| 13 | 0.618 | diatoms | [ <i>Montagnes and Franklin, 2001</i> ] | Montagnes, 2001 |
| 13 | 0.642 | diatoms | [ <i>Montagnes and Franklin, 2001</i> ] | Montagnes, 2001 |
| 13 | 0.681 | diatoms | [ <i>Montagnes and Franklin, 2001</i> ] | Montagnes, 2001 |
| 13 | 0.697 | diatoms | [ <i>Montagnes and Franklin, 2001</i> ] | Montagnes, 2001 |
| 13 | 0.706 | diatoms | [ <i>Montagnes and Franklin, 2001</i> ] | Montagnes, 2001 |
| 13 | 0.771 | diatoms | [ <i>Montagnes and Franklin, 2001</i> ] | Montagnes, 2001 |
| 13 | 0.778 | diatoms | [ <i>Montagnes and Franklin, 2001</i> ] | Montagnes, 2001 |
| 13 | 0.808 | diatoms | [ <i>Montagnes and Franklin, 2001</i> ] | Montagnes, 2001 |
| 16 | 0.554 | diatoms | [ <i>Montagnes and Franklin, 2001</i> ] | Montagnes, 2001 |
| 16 | 0.608 | diatoms | [ <i>Montagnes and Franklin, 2001</i> ] | Montagnes, 2001 |
| 16 | 0.675 | diatoms | [ <i>Montagnes and Franklin, 2001</i> ] | Montagnes, 2001 |

|      |       |         |                                         |                 |
|------|-------|---------|-----------------------------------------|-----------------|
| 16   | 0.687 | diatoms | [ <i>Montagnes and Franklin, 2001</i> ] | Montagnes, 2001 |
| 16   | 0.716 | diatoms | [ <i>Montagnes and Franklin, 2001</i> ] | Montagnes, 2001 |
| 16   | 0.718 | diatoms | [ <i>Montagnes and Franklin, 2001</i> ] | Montagnes, 2001 |
| 16   | 0.768 | diatoms | [ <i>Montagnes and Franklin, 2001</i> ] | Montagnes, 2001 |
| 16   | 0.875 | diatoms | [ <i>Montagnes and Franklin, 2001</i> ] | Montagnes, 2001 |
| 16   | 0.904 | diatoms | [ <i>Montagnes and Franklin, 2001</i> ] | Montagnes, 2001 |
| 16   | 0.970 | diatoms | [ <i>Montagnes and Franklin, 2001</i> ] | Montagnes, 2001 |
| 16.5 | 0.305 | diatoms | [ <i>Montagnes and Franklin, 2001</i> ] | Montagnes, 2001 |
| 16.5 | 0.322 | diatoms | [ <i>Montagnes and Franklin, 2001</i> ] | Montagnes, 2001 |
| 16.5 | 0.370 | diatoms | [ <i>Montagnes and Franklin, 2001</i> ] | Montagnes, 2001 |
| 16.5 | 0.592 | diatoms | [ <i>Montagnes and Franklin, 2001</i> ] | Montagnes, 2001 |
| 16.5 | 0.632 | diatoms | [ <i>Montagnes and Franklin, 2001</i> ] | Montagnes, 2001 |
| 16.5 | 0.650 | diatoms | [ <i>Montagnes and Franklin, 2001</i> ] | Montagnes, 2001 |
| 16.5 | 0.656 | diatoms | [ <i>Montagnes and Franklin, 2001</i> ] | Montagnes, 2001 |
| 16.5 | 0.661 | diatoms | [ <i>Montagnes and Franklin, 2001</i> ] | Montagnes, 2001 |
| 16.5 | 0.673 | diatoms | [ <i>Montagnes and Franklin, 2001</i> ] | Montagnes, 2001 |
| 17   | 0.845 | diatoms | [ <i>Montagnes and Franklin, 2001</i> ] | Montagnes, 2001 |
| 17   | 1.150 | diatoms | [ <i>Montagnes and Franklin, 2001</i> ] | Montagnes, 2001 |
| 20   | 0.443 | diatoms | [ <i>Montagnes and Franklin, 2001</i> ] | Montagnes, 2001 |
| 20   | 0.579 | diatoms | [ <i>Montagnes and Franklin, 2001</i> ] | Montagnes, 2001 |
| 20   | 0.608 | diatoms | [ <i>Montagnes and Franklin, 2001</i> ] | Montagnes, 2001 |
| 20   | 0.708 | diatoms | [ <i>Montagnes and Franklin, 2001</i> ] | Montagnes, 2001 |
| 20   | 0.713 | diatoms | [ <i>Montagnes and Franklin, 2001</i> ] | Montagnes, 2001 |
| 20   | 0.722 | diatoms | [ <i>Montagnes and Franklin, 2001</i> ] | Montagnes, 2001 |
| 20   | 0.725 | diatoms | [ <i>Montagnes and Franklin, 2001</i> ] | Montagnes, 2001 |
| 20   | 0.725 | diatoms | [ <i>Montagnes and Franklin, 2001</i> ] | Montagnes, 2001 |
| 20   | 0.746 | diatoms | [ <i>Montagnes and Franklin, 2001</i> ] | Montagnes, 2001 |
| 20   | 0.749 | diatoms | [ <i>Montagnes and Franklin, 2001</i> ] | Montagnes, 2001 |

|    |       |         |                                         |                                |
|----|-------|---------|-----------------------------------------|--------------------------------|
|    |       |         | 2001]                                   |                                |
| 20 | 0.839 | diatoms | [ <i>Montagnes and Franklin, 2001</i> ] | Montagnes, 2001                |
| 20 | 0.854 | diatoms | [ <i>Montagnes and Franklin, 2001</i> ] | Montagnes, 2001                |
| 20 | 0.885 | diatoms | [ <i>Montagnes and Franklin, 2001</i> ] | Montagnes, 2001                |
| 20 | 0.902 | diatoms | [ <i>Montagnes and Franklin, 2001</i> ] | Montagnes, 2001                |
| 20 | 0.922 | diatoms | [ <i>Montagnes and Franklin, 2001</i> ] | Montagnes, 2001                |
| 20 | 1.215 | diatoms | [ <i>Montagnes and Franklin, 2001</i> ] | Montagnes, 2001                |
| 20 | 1.310 | diatoms | [ <i>Montagnes and Franklin, 2001</i> ] | Montagnes, 2001                |
| 20 | 1.383 | diatoms | [ <i>Montagnes and Franklin, 2001</i> ] | Montagnes, 2001                |
| 25 | 0.561 | diatoms | [ <i>Montagnes and Franklin, 2001</i> ] | Montagnes, 2001                |
| 25 | 0.644 | diatoms | [ <i>Montagnes and Franklin, 2001</i> ] | Montagnes, 2001                |
| 25 | 0.715 | diatoms | [ <i>Montagnes and Franklin, 2001</i> ] | Montagnes, 2001                |
| 25 | 0.731 | diatoms | [ <i>Montagnes and Franklin, 2001</i> ] | Montagnes, 2001                |
| 25 | 0.744 | diatoms | [ <i>Montagnes and Franklin, 2001</i> ] | Montagnes, 2001                |
| 25 | 0.746 | diatoms | [ <i>Montagnes and Franklin, 2001</i> ] | Montagnes, 2001                |
| 25 | 0.769 | diatoms | [ <i>Montagnes and Franklin, 2001</i> ] | Montagnes, 2001                |
| 25 | 0.811 | diatoms | [ <i>Montagnes and Franklin, 2001</i> ] | Montagnes, 2001                |
| 25 | 1.367 | diatoms | [ <i>Montagnes and Franklin, 2001</i> ] | Montagnes, 2001                |
| 25 | 1.845 | diatoms | [ <i>Montagnes and Franklin, 2001</i> ] | Montagnes, 2001                |
| 9  | 0.150 | diatoms | [ <i>Montagnes and Franklin, 2001</i> ] | Montagnes, 2001                |
| 9  | 0.152 | diatoms | [ <i>Montagnes and Franklin, 2001</i> ] | Montagnes, 2001                |
| 9  | 0.179 | diatoms | [ <i>Montagnes and Franklin, 2001</i> ] | Montagnes, 2001                |
| 13 | 0.555 | diatoms | [ <i>Montagnes and Franklin, 2001</i> ] | Montagnes, 2001                |
| 13 | 0.575 | diatoms | [ <i>Montagnes and Franklin, 2001</i> ] | Montagnes, 2001                |
| 13 | 0.616 | diatoms | [ <i>Montagnes and Franklin, 2001</i> ] | Montagnes, 2001                |
| 7  | 0.169 | diatoms | [ <i>Morris and Glover, 1974</i> ]      | Morris, I. & Glover, H.E. 1974 |
| 7  | 0.240 | diatoms | [ <i>Morris and Glover, 1974</i> ]      | Morris, I. & Glover, H.E. 1974 |
| 7  | 0.263 | diatoms | [ <i>Morris and Glover, 1974</i> ]      | Morris, I. & Glover, H.E. 1974 |
| 7  | 0.530 | diatoms | [ <i>Morris and Glover, 1974</i> ]      | Morris, I. & Glover, H.E. 1974 |
| 12 | 0.210 | diatoms | [ <i>Morris and Glover, 1974</i> ]      | Morris, I. & Glover, H.E. 1974 |

|      |       |         |                                            |                                |
|------|-------|---------|--------------------------------------------|--------------------------------|
| 12   | 0.491 | diatoms | [ <i>Morris and Glover, 1974</i> ]         | Morris, I. & Glover, H.E. 1974 |
| 12   | 0.514 | diatoms | [ <i>Morris and Glover, 1974</i> ]         | Morris, I. & Glover, H.E. 1974 |
| 12   | 1.159 | diatoms | [ <i>Morris and Glover, 1974</i> ]         | Morris, I. & Glover, H.E. 1974 |
| 18   | 0.213 | diatoms | [ <i>Morris and Glover, 1974</i> ]         | Morris, I. & Glover, H.E. 1974 |
| 18   | 0.574 | diatoms | [ <i>Morris and Glover, 1974</i> ]         | Morris, I. & Glover, H.E. 1974 |
| 18   | 1.320 | diatoms | [ <i>Morris and Glover, 1974</i> ]         | Morris, I. & Glover, H.E. 1974 |
| 16   | 0.540 | diatoms | [ <i>D. L. Muggli and Harrison, 1997</i> ] | Muggli and Harrison 1997       |
| 16   | 0.418 | diatoms | [ <i>Deborah L. Muggli et al., 1996</i> ]  | Muggli et al. 1996             |
| 16   | 0.461 | diatoms | [ <i>Deborah L. Muggli et al., 1996</i> ]  | Muggli et al. 1996             |
| 20   | 0.650 | diatoms | [ <i>Schone, 1982</i> ]                    | Schone, 1982                   |
| 20   | 0.690 | diatoms | [ <i>Schone, 1982</i> ]                    | Schone, 1982                   |
| 20   | 0.780 | diatoms | [ <i>Schone, 1982</i> ]                    | Schone, 1982                   |
| 20   | 1.370 | diatoms | [ <i>Schone, 1982</i> ]                    | Schone, 1982                   |
| 20   | 0.900 | diatoms | [ <i>W G Sunda and Huntsman, 1995</i> ]    | Sunda and Huntsman - 1995      |
| 20   | 1.600 | diatoms | [ <i>W G Sunda and Huntsman, 1995</i> ]    | Sunda and Huntsman - 1995      |
| 20   | 1.800 | diatoms | [ <i>W G Sunda and Huntsman, 1995</i> ]    | Sunda and Huntsman - 1995      |
| -2   | 0.343 | diatoms | [ <i>Suzuki and Takahashi, 1995</i> ]      | Suzuki and Takahashi - 1995    |
| -1.8 | 0.318 | diatoms | [ <i>Suzuki and Takahashi, 1995</i> ]      | Suzuki and Takahashi - 1995    |
| -1.8 | 0.354 | diatoms | [ <i>Suzuki and Takahashi, 1995</i> ]      | Suzuki and Takahashi - 1995    |
| 0    | 0.173 | diatoms | [ <i>Suzuki and Takahashi, 1995</i> ]      | Suzuki and Takahashi - 1995    |
| 0    | 0.177 | diatoms | [ <i>Suzuki and Takahashi, 1995</i> ]      | Suzuki and Takahashi - 1995    |
| 0    | 0.187 | diatoms | [ <i>Suzuki and Takahashi, 1995</i> ]      | Suzuki and Takahashi - 1995    |
| 0    | 0.193 | diatoms | [ <i>Suzuki and Takahashi, 1995</i> ]      | Suzuki and Takahashi - 1995    |
| 0    | 0.238 | diatoms | [ <i>Suzuki and Takahashi, 1995</i> ]      | Suzuki and Takahashi - 1995    |
| 0    | 0.262 | diatoms | [ <i>Suzuki and Takahashi, 1995</i> ]      | Suzuki and Takahashi - 1995    |
| 0    | 0.267 | diatoms | [ <i>Suzuki and Takahashi, 1995</i> ]      | Suzuki and Takahashi - 1995    |
| 0    | 0.280 | diatoms | [ <i>Suzuki and Takahashi, 1995</i> ]      | Suzuki and Takahashi - 1995    |
| 0    | 0.320 | diatoms | [ <i>Suzuki and Takahashi, 1995</i> ]      | Suzuki and Takahashi - 1995    |
| 0    | 0.364 | diatoms | [ <i>Suzuki and Takahashi, 1995</i> ]      | Suzuki and Takahashi - 1995    |
| 0    | 0.406 | diatoms | [ <i>Suzuki and Takahashi, 1995</i> ]      | Suzuki and Takahashi - 1995    |
| 0    | 0.427 | diatoms | [ <i>Suzuki and Takahashi, 1995</i> ]      | Suzuki and Takahashi - 1995    |
| 0    | 0.450 | diatoms | [ <i>Suzuki and Takahashi, 1995</i> ]      | Suzuki and Takahashi - 1995    |
| 0    | 0.482 | diatoms | [ <i>Suzuki and Takahashi, 1995</i> ]      | Suzuki and Takahashi - 1995    |
| 0    | 0.483 | diatoms | [ <i>Suzuki and Takahashi, 1995</i> ]      | Suzuki and Takahashi - 1995    |
| 0    | 0.488 | diatoms | [ <i>Suzuki and Takahashi, 1995</i> ]      | Suzuki and Takahashi - 1995    |
| 0    | 0.512 | diatoms | [ <i>Suzuki and Takahashi, 1995</i> ]      | Suzuki and Takahashi - 1995    |
| 0    | 0.515 | diatoms | [ <i>Suzuki and Takahashi, 1995</i> ]      | Suzuki and Takahashi - 1995    |
| 0    | 0.516 | diatoms | [ <i>Suzuki and Takahashi, 1995</i> ]      | Suzuki and Takahashi - 1995    |
| 0    | 0.536 | diatoms | [ <i>Suzuki and Takahashi, 1995</i> ]      | Suzuki and Takahashi - 1995    |
| 0    | 0.538 | diatoms | [ <i>Suzuki and Takahashi, 1995</i> ]      | Suzuki and Takahashi - 1995    |
| 0    | 0.597 | diatoms | [ <i>Suzuki and Takahashi, 1995</i> ]      | Suzuki and Takahashi - 1995    |
| 2    | 0.432 | diatoms | [ <i>Suzuki and Takahashi, 1995</i> ]      | Suzuki and Takahashi - 1995    |
| 2    | 0.447 | diatoms | [ <i>Suzuki and Takahashi, 1995</i> ]      | Suzuki and Takahashi - 1995    |







|      |       |         |                                  |                             |
|------|-------|---------|----------------------------------|-----------------------------|
| 30   | 0.000 | diatoms | [Suzuki and Takahashi, 1995]     | Suzuki and Takahashi - 1995 |
| 30   | 0.853 | diatoms | [Suzuki and Takahashi, 1995]     | Suzuki and Takahashi - 1995 |
| 30   | 0.867 | diatoms | [Suzuki and Takahashi, 1995]     | Suzuki and Takahashi - 1995 |
| 30   | 0.872 | diatoms | [Suzuki and Takahashi, 1995]     | Suzuki and Takahashi - 1995 |
| 30   | 0.878 | diatoms | [Suzuki and Takahashi, 1995]     | Suzuki and Takahashi - 1995 |
| 30   | 0.892 | diatoms | [Suzuki and Takahashi, 1995]     | Suzuki and Takahashi - 1995 |
| 30   | 1.054 | diatoms | [Suzuki and Takahashi, 1995]     | Suzuki and Takahashi - 1995 |
| 30   | 1.061 | diatoms | [Suzuki and Takahashi, 1995]     | Suzuki and Takahashi - 1995 |
| 30   | 1.196 | diatoms | [Suzuki and Takahashi, 1995]     | Suzuki and Takahashi - 1995 |
| 35   | 0.000 | diatoms | [Suzuki and Takahashi, 1995]     | Suzuki and Takahashi - 1995 |
| 35   | 0.000 | diatoms | [Suzuki and Takahashi, 1995]     | Suzuki and Takahashi - 1995 |
| 35   | 0.160 | diatoms | [Suzuki and Takahashi, 1995]     | Suzuki and Takahashi - 1995 |
| 18   | 3.600 | diatoms | [P. A. Thompson, 1999]           | Thompson - 1999             |
| 10   | 0.650 | diatoms | [Peter A. Thompson et al., 1992] | Thompson et al. 1992        |
| 10   | 0.670 | diatoms | [Peter A. Thompson et al., 1992] | Thompson et al. 1992        |
| 10   | 0.690 | diatoms | [Peter A. Thompson et al., 1992] | Thompson et al. 1992        |
| 10   | 0.740 | diatoms | [Peter A. Thompson et al., 1992] | Thompson et al. 1992        |
| 10   | 0.960 | diatoms | [Peter A. Thompson et al., 1992] | Thompson et al. 1992        |
| 15   | 1.100 | diatoms | [Peter A. Thompson et al., 1992] | Thompson et al. 1992        |
| 15   | 1.190 | diatoms | [Peter A. Thompson et al., 1992] | Thompson et al. 1992        |
| 15   | 1.250 | diatoms | [Peter A. Thompson et al., 1992] | Thompson et al. 1992        |
| 15   | 1.370 | diatoms | [Peter A. Thompson et al., 1992] | Thompson et al. 1992        |
| 15   | 1.870 | diatoms | [Peter A. Thompson et al., 1992] | Thompson et al. 1992        |
| 17.5 | 1.220 | diatoms | [Peter A. Thompson et al., 1992] | Thompson et al. 1992        |
| 17.5 | 1.540 | diatoms | [Peter A. Thompson et al., 1992] | Thompson et al. 1992        |
| 17.5 | 1.840 | diatoms | [Peter A. Thompson et al., 1992] | Thompson et al. 1992        |
| 17.5 | 1.950 | diatoms | [Peter A. Thompson et al., 1992] | Thompson et al. 1992        |
| 17.5 | 2.000 | diatoms | [Peter A. Thompson et al., 1992] | Thompson et al. 1992        |
| 20   | 1.330 | diatoms | [Peter A. Thompson et al., 1992] | Thompson et al. 1992        |
| 20   | 1.470 | diatoms | [Peter A. Thompson et al., 1992] | Thompson et al. 1992        |
| 20   | 1.520 | diatoms | [Peter A. Thompson et al., 1992] | Thompson et al. 1992        |
| 20   | 1.670 | diatoms | [Peter A. Thompson et al., 1992] | Thompson et al. 1992        |
| 20   | 1.710 | diatoms | [Peter A. Thompson et al., 1992] | Thompson et al. 1992        |

|    |       |         |                                  |                      |
|----|-------|---------|----------------------------------|----------------------|
| 25 | 1.010 | diatoms | [Peter A. Thompson et al., 1992] | Thompson et al. 1992 |
| 25 | 1.560 | diatoms | [Peter A. Thompson et al., 1992] | Thompson et al. 1992 |
| 25 | 2.230 | diatoms | [Peter A. Thompson et al., 1992] | Thompson et al. 1992 |
| 25 | 2.350 | diatoms | [Peter A. Thompson et al., 1992] | Thompson et al. 1992 |
| 25 | 3.390 | diatoms | [Peter A. Thompson et al., 1992] | Thompson et al. 1992 |
| 0  | 0.057 | diatoms | [Yoder, 1979]                    | Yolder 1979          |
| 0  | 0.141 | diatoms | [Yoder, 1979]                    | Yolder 1979          |
| 0  | 0.414 | diatoms | [Yoder, 1979]                    | Yolder 1979          |
| 0  | 0.434 | diatoms | [Yoder, 1979]                    | Yolder 1979          |
| 0  | 0.453 | diatoms | [Yoder, 1979]                    | Yolder 1979          |
| 0  | 0.457 | diatoms | [Yoder, 1979]                    | Yolder 1979          |
| 0  | 0.461 | diatoms | [Yoder, 1979]                    | Yolder 1979          |
| 0  | 0.463 | diatoms | [Yoder, 1979]                    | Yolder 1979          |
| 0  | 0.465 | diatoms | [Yoder, 1979]                    | Yolder 1979          |
| 5  | 0.182 | diatoms | [Yoder, 1979]                    | Yolder 1979          |
| 5  | 0.210 | diatoms | [Yoder, 1979]                    | Yolder 1979          |
| 5  | 0.518 | diatoms | [Yoder, 1979]                    | Yolder 1979          |
| 5  | 0.671 | diatoms | [Yoder, 1979]                    | Yolder 1979          |
| 5  | 0.826 | diatoms | [Yoder, 1979]                    | Yolder 1979          |
| 5  | 0.869 | diatoms | [Yoder, 1979]                    | Yolder 1979          |
| 5  | 0.907 | diatoms | [Yoder, 1979]                    | Yolder 1979          |
| 5  | 0.924 | diatoms | [Yoder, 1979]                    | Yolder 1979          |
| 5  | 0.935 | diatoms | [Yoder, 1979]                    | Yolder 1979          |
| 5  | 0.942 | diatoms | [Yoder, 1979]                    | Yolder 1979          |
| 10 | 0.090 | diatoms | [Yoder, 1979]                    | Yolder 1979          |
| 10 | 0.180 | diatoms | [Yoder, 1979]                    | Yolder 1979          |
| 10 | 0.333 | diatoms | [Yoder, 1979]                    | Yolder 1979          |
| 10 | 0.633 | diatoms | [Yoder, 1979]                    | Yolder 1979          |
| 10 | 0.874 | diatoms | [Yoder, 1979]                    | Yolder 1979          |
| 10 | 1.091 | diatoms | [Yoder, 1979]                    | Yolder 1979          |
| 10 | 1.115 | diatoms | [Yoder, 1979]                    | Yolder 1979          |
| 10 | 1.189 | diatoms | [Yoder, 1979]                    | Yolder 1979          |
| 10 | 1.425 | diatoms | [Yoder, 1979]                    | Yolder 1979          |
| 10 | 1.613 | diatoms | [Yoder, 1979]                    | Yolder 1979          |
| 16 | 0.390 | diatoms | [Yoder, 1979]                    | Yolder 1979          |
| 16 | 0.538 | diatoms | [Yoder, 1979]                    | Yolder 1979          |
| 16 | 0.900 | diatoms | [Yoder, 1979]                    | Yolder 1979          |
| 16 | 1.436 | diatoms | [Yoder, 1979]                    | Yolder 1979          |
| 16 | 1.502 | diatoms | [Yoder, 1979]                    | Yolder 1979          |
| 16 | 1.739 | diatoms | [Yoder, 1979]                    | Yolder 1979          |
| 16 | 2.019 | diatoms | [Yoder, 1979]                    | Yolder 1979          |
| 16 | 2.068 | diatoms | [Yoder, 1979]                    | Yolder 1979          |
| 16 | 2.179 | diatoms | [Yoder, 1979]                    | Yolder 1979          |
| 16 | 2.522 | diatoms | [Yoder, 1979]                    | Yolder 1979          |

|    |       |         |               |             |
|----|-------|---------|---------------|-------------|
| 16 | 2.616 | diatoms | [Yoder, 1979] | Yolder 1979 |
| 16 | 2.859 | diatoms | [Yoder, 1979] | Yolder 1979 |
| 16 | 3.152 | diatoms | [Yoder, 1979] | Yolder 1979 |
| 16 | 3.408 | diatoms | [Yoder, 1979] | Yolder 1979 |
| 22 | 0.789 | diatoms | [Yoder, 1979] | Yolder 1979 |
| 22 | 1.577 | diatoms | [Yoder, 1979] | Yolder 1979 |
| 22 | 2.085 | diatoms | [Yoder, 1979] | Yolder 1979 |
| 22 | 2.366 | diatoms | [Yoder, 1979] | Yolder 1979 |
| 22 | 3.099 | diatoms | [Yoder, 1979] | Yolder 1979 |
| 22 | 3.099 | diatoms | [Yoder, 1979] | Yolder 1979 |
| 22 | 3.606 | diatoms | [Yoder, 1979] | Yolder 1979 |
| 22 | 3.634 | diatoms | [Yoder, 1979] | Yolder 1979 |
| 22 | 3.718 | diatoms | [Yoder, 1979] | Yolder 1979 |

### References:

- Aelion, C. M., and S. W. Chisholm (1985), Effect of Temperature on Growth and Ingestion Rates of *Favella* Sp, *J. Plankton Res.*, 7(6), 821-830.
- Agawin, N. S. R., C. M. Duarte, and S. Agusti (1998), Growth and abundance of *Synechococcus* sp. in a Mediterranean Bay: seasonality and relationship with temperature, *Mar Ecol-Prog Ser*, 170, 45-53.
- Balch, W. M., J. Fritz, and E. Fernandez (1996), Decoupling of calcification and photosynthesis in the coccolithophore *Emiliana huxleyi* under steady-state light-limited growth, *Mar Ecol-Prog Ser*, 142(1-3), 87-97.
- Berman-Frank, I., J. T. Cullen, Y. Shaked, R. M. Sherrell, and P. G. Falkowski (2001), Iron availability, cellular iron quotas, and nitrogen fixation in *Trichodesmium*, *Limnology and Oceanography*, 46(6), 1249-1260.
- Binder, B. J., and Y. C. Liu (1998), Growth rate regulation of rRNA content of a marine *Synechococcus* (Cyanobacterium) strain, *Appl Environ Microb*, 64(9), 3346-3351.
- Blankley, W. F., and R. A. Lewin (1976), TEMPERATURE RESPONSES OF A COCCOLITHOPHORID, *CRICOSPHAERA-CARTERAE*, MEASURED IN A SIMPLE AND INEXPENSIVE THERMAL-GRADIENT DEVICE, *Limnology and Oceanography*, 21(3), 457-462.
- Blasco, D., T. T. Packard, and P. C. Garfield (1982), Size dependence of growth rate, respiratory electron transport system activity, and chemical composition in marine diatoms in the laboratory, *J Phycol*, 18(1), 58-63.
- Brand, L. E. (1982), GENETIC-VARIABILITY AND SPATIAL PATTERNS OF GENETIC DIFFERENTIATION IN THE REPRODUCTIVE RATES OF THE MARINE COCCOLITHOPHORES *EMILIANA-HUXLEYI* AND *GEPHYROCAPSA-OCEANICA*, *Limnology and Oceanography*, 27(2), 236-245.
- Brand, L. E. (1984), THE SALINITY TOLERANCE OF 46 MARINE-PHYTOPLANKTON ISOLATES, *Estuarine Coastal and Shelf Science*, 18(5), 543-556.

- Brand, L. E., and R. R. L. Guillard (1981), THE EFFECTS OF CONTINUOUS LIGHT AND LIGHT-INTENSITY ON THE REPRODUCTION RATES OF 22 SPECIES OF MARINE-PHYTOPLANKTON, *Journal of Experimental Marine Biology and Ecology*, 50(2-3), 119-132.
- Breitbarth, E., A. Oschlies, and J. LaRoche (2007), Physiological constraints on the global distribution of Trichodesmium - effect of temperature on diazotrophy, *Biogeosciences*, 4(1), 53-61.
- Buitenhuis, E. T., H. J. W. de Baar, and M. J. W. Veldhuis (1999), Photosynthesis and calcification by *Emiliana huxleyi* (Prymnesiophyceae) as a function of inorganic carbon species, *J Phycol*, 35(5), 949-959.
- Buitenhuis, E. T., T. Pangerc, D. J. Franklin, C. Le Quéré, and G. Malin (2008), Growth rates of six coccolithophorid strains as a function of temperature, *Limnology and Oceanography*, 53(3), 1181-1185.
- Burkhardt, S., and U. Riebesell (1997), CO<sub>2</sub> availability affects elemental composition (C:N:P) of the marine diatom *Skeletonema costatum*, *Marine ecology progress series*, 155, 67-76.
- Burkhardt, S., I. Zondervan, and U. Riebesell (1999), Effect of CO<sub>2</sub> concentration on C: N: P ratio in marine phytoplankton: A species comparison, *Limnol. Oceanogr*, 44(3), 683-690.
- Campbell, L., and E. J. Carpenter (1986), Diel Patterns of Cell-Division in Marine *Synechococcus* Spp (Cyanobacteria) - Use of the Frequency of Dividing Cells Technique to Measure Growth-Rate, *Mar Ecol-Prog Ser*, 32(2-3), 139-148.
- Carpenter, E. J., and J. J. McCarthy (1975), Nitrogen-Fixation and Uptake of Combined Nitrogenous Nutrients by *Oscillatoria* (Trichodesmium) Thiebautii in Western Sargasso Sea, *Limnology and Oceanography*, 20(3), 389-401.
- Carpenter, E. J., and C. C. Price (1976), Marine *Oscillatoria* (Trichodesmium) - Explanation for Aerobic Nitrogen-Fixation without Heterocysts, *Science*, 191(4233), 1278-1280.
- Carpenter, E. J., and C. C. Price (1977), Nitrogen-Fixation, Distribution, and Production of *Oscillatoria*-(Trichodesmium) Spp in Western Sargasso and Caribbean Seas, *Limnology and Oceanography*, 22(1), 60-72.
- Carpenter, E. J., and J. S. Lively (1980), Review of estimates of algal growth using carbon-14 techniques, in *Primary Production in the Sea*, edited by P. Falkowski, pp. 161-178, Plenum Press, Brookhaven Symposium.
- Carpenter, E. J., J. M. Oneil, R. Dawson, D. G. Capone, P. J. A. Siddiqui, T. Roenneberg, and B. Bergman (1993), The Tropical Diazotrophic Phytoplankter Trichodesmium - Biological Characteristics of 2 Common Species, *Mar Ecol-Prog Ser*, 95(3), 295-304.
- El-Sabaawi, R., and P. J. Harrison (2006), Interactive effects of irradiance and temperature on the photosynthetic physiology of the pennate diatoms *Pseudo-nitzschia granii* (Bacillariophyceae) from the northeast subarctic pacific., *J Phycol*, 42, 778-785.
- Eppley, R. W., and P. R. Sloan (1966), GROWTH RATES OF MARINE PHYTOPLANKTON - CORRELATION WITH LIGHT ABSORPTION BY CELL CHLOROPHYLL ALPHA, *Physiologia Plantarum*, 19(1), 47-&.
- Eppley, R. W., and P. R. Sloan (1966), Growth Rates of Marine Phytoplankton: Correlation with Light Absorption by Cell Chlorophyll *a*, *Physiologia Plantarum*, 19(1), 47-59.

- Eppley, R. W., and Coatsworth, J. (1966), Culture of Marine Phytoplankton *Dunaliella tertiolecta* with Light-Dark Cycles, *Archiv Fur Mikrobiologie*, 55(1), 66-8.
- Feng, Y., M. E. Warner, Y. Zhang, J. Sun, F. X. Fu, J. M. Rose, and D. A. Hutchins (2008), Interactive effects of increased pCO<sub>2</sub>, temperature and irradiance on the marine coccolithophore *Emiliana huxleyi* (Prymnesiophyceae), *European Journal of Phycology*, 43(1), 87-98.
- Fisher, N. S., and S. Honjo (1989), Intraspecific differences in temperature and salinity responses in the coccolithophore *Emiliana huxleyi*, *Biological Oceanography*, 6, 355-361.
- Franklin, D. J., M. Steinke, J. Young, I. Probert, and G. Malin (2010), Dimethylsulphoniopropionate (DMSP), DMSP-lyase activity (DLA) and dimethylsulphide (DMS) in 10 species of coccolithophore, *Mar Ecol-Prog Ser*, 410, 13-23.
- Fritz, J. J. (1999), Carbon fixation and coccolith detachment in the coccolithophore *Emiliana huxleyi* in nitrate-limited cyclostats, *Marine Biology*, 133(3), 509-518.
- Fritz, J. J., and W. M. Balch (1996), A light-limited continuous culture study of *Emiliana huxleyi*: Determination of coccolith detachment and its relevance to cell sinking, *Journal of Experimental Marine Biology and Ecology*, 207(1-2), 127-147.
- Glover, H. E., M. D. Keller, and R. W. Spinrad (1987), The Effects of Light Quality and Intensity on Photosynthesis and Growth of Marine Eukaryotic and Prokaryotic Phytoplankton Clones, *Journal of Experimental Marine Biology and Ecology*, 105(2-3), 137-159.
- Goldman, J. C., D. A. Hansell, and M. R. Dennett (1992), Chemical characterization of three large oceanic diatoms: potential impact on the water column chemistry., *Mar. Ecol. Prog. Ser.*, 88, 257-270.
- Harris, G. N., D. J. Scanlan, and R. J. Geider (2005), Acclimation of *Emiliana huxleyi* (Prymnesiophyceae) to photon flux density, *J Phycol*, 41(4), 851-862.
- Harrison, G. I., and F. M. M. Morel (1986), *Limnol. Oceanogr.*, 31, 989-997.
- Holl, C. (2004), Georgia University of Technology, Atlanta, US.
- Holl, C., and J. Montoya (2005), Interactions between nitrate uptake and nitrogen fixation in continuous cultures of the marine diazotroph *Trichodesmium* (cyanobacteria), *J. Phycol.*, 41, 1171-1183.
- Houdan, A., I. Probert, K. Van Lenning, and S. Lefebvre (2005), Comparison of photosynthetic responses in diploid and haploid life-cycle phases of *Emiliana huxleyi* (Prymnesiophyceae), *Mar Ecol-Prog Ser*, 292, 139-146.
- Houdan, A., I. Probert, C. Zatylny, B. Veron, and C. Billard (2006), Ecology of oceanic coccolithophores. I. Nutritional preferences of the two stages in the life cycle of *Coccolithus braarudii* and *Calcidiscus leptoporus*, *Aquatic Microbial Ecology*, 44(3), 291-301.
- Jensen, M. O., and O. Moestrup (1997), Autecology of the toxic dinoflagellate *Alexandrium ostenfeldii*: Life history and growth at different temperatures and salinities, *European Journal of Phycology*, 32(1), 9-18.
- Johnson, Z. I., E. R. Zinser, A. Coe, N. P. McNulty, E. M. S. Woodward, and S. W. Chisholm (2006), Niche partitioning among *Prochlorococcus* ecotypes along ocean-scale environmental gradients, *Science*, 311(5768), 1737-1740.

- Jørgensen, E. G. (1968), The adaptation of plankton algae. II. Aspects of the temperature adaptation of *Skeletonema costatum*., *Physiologia Plantarum*, 21, 423-427.
- Kana, T. M., and P. M. Glibert (1987), Effect of Irradiances up to 2000  $\mu\text{E m}^{-2}\text{s}^{-1}$  on Marine Synechococcus Wh7803 .1. Growth, Pigmentation, and Cell Composition, *Deep-Sea Research Part a-Oceanographic Research Papers*, 34(4), 479-495.
- Karsten, U., R. Schumann, S. Rothe, I. Jung, and L. Medlin (2006), Temperature and light requirements for growth of two diatom species (Bacillariophyceae) isolated from an Arctic macroalga, *Polar Biology*, 29(6), 476-486.
- Karwath, B., D. Janofske, F. Tietjen, and H. Willems (2000), Temperature effects on growth and cell size in the marine calcareous dinoflagellate *Thoracospaera heimii*, *Marine Micropaleontology*, 39(1-4), 43-51.
- Kudo, I., M. Miyamoto, Y. Noiri, and Y. Maita (2000), Combined effects of temperature and iron on the growth and physiology of the marine diatom *Phaeodactylum tricorutum* (Bacillariophyceae), *J Phycol*, 36(6), 1096-1102.
- Landry, M. R., L. W. Haas, and V. L. Fagerness (1984), Dynamics of Microbial Plankton Communities - Experiments in Kaneohe Bay, Hawaii, *Mar Ecol-Prog Ser*, 16(1-2), 127-133.
- Langer, G., N. Gussone, G. Nehrke, U. Riebesell, A. Eisenhauer, and S. Thoms (2007), Calcium isotope fractionation during coccolith formation in *Emiliana huxleyi*: Independence of growth and calcification rate, *Geochemistry Geophysics Geosystems*, 8.
- LaRoche, J., and E. Breitbart (2005), Importance of the diazotrophs as a source of new nitrogen in the ocean, *J Sea Res*, 53(1-2), 67-91.
- Lecourt, M., D. L. Muggli, and P. J. Harrison (1996), Comparison of growth and sinking rates of non-coccolith- and coccolith-forming strains of *Emiliana huxleyi* (Prymnesiophyceae) grown under different irradiances and nitrogen sources, *J Phycol*, 32(1), 17-21.
- Levitan, O., G. Rosenberg, I. Setlik, E. Setlikova, J. Grigel, J. Klepetar, O. Prasil, and I. Berman-Frank (2007), Elevated CO<sub>2</sub> enhances nitrogen fixation and growth in the marine cyanobacterium *Trichodesmium*, *Global Change Biol*, 13(2), 531-538.
- Lomas, M. W., and P. M. Glibert (1999), Interactions between NH<sub>4</sub><sup>+</sup> and NO<sub>3</sub><sup>-</sup> uptake and assimilation: comparison of diatoms and dinoflagellates at several growth temperatures, *Marine Biology*, 133(3), 541-551.
- Maldonado, M. T., and N. M. Price (1996), Influence of N substrate on Fe requirements of marine centric diatoms, *Marine Ecology Progress Series*, 141, 161-172.
- Mccarthy, J. J., and E. J. Carpenter (1979), *Oscillatoria* (*Trichodesmium*) *Thiebautii* (Cyanophyta) in the Central North-Atlantic Ocean, *J Phycol*, 15(1), 75-82.
- Meeson, B. W., and B. M. Sweeney (1982), Adaptation of *Ceratium-Furca* and *Gonyaulax-Polyedra* (Dinophyceae) to Different Temperatures and Irradiances - Growth-Rates and Cell Volumes, *J Phycol*, 18(2), 241-245.
- Milligan, A. J., and P. J. Harrison (2000), Effects of non-steady-state iron limitation on nitrogen assimilatory enzymes in the marine diatom *Thalassiosira weissflogii* (BACILLARIOPHYCEAE), *J Phycol*, 36(1), 78-86.



- Mjaaland, G. (1956), Laboratory experiments on *Coccolithus huxleyi*, *Oikos*, 7, 251-256.
- Montagnes, D. J. S., and D. J. Franklin (2001), Effect of temperature on diatom volume, growth rate, and carbon and nitrogen content: reconsidering some paradigms, *Limnology and Oceanography*, 46(8), 2008-2018.
- Moore, L. R., R. Goericke, and S. W. Chisholm (1995), Comparative Physiology of Synechococcus and Prochlorococcus - Influence of Light and Temperature on Growth, Pigments, Fluorescence and Absorptive Properties, *Mar Ecol-Prog Ser*, 116(1-3), 259-275.
- Morris, I., and H. E. Glover (1974), Questions on Mechanism of Temperature Adaptation in Marine Phytoplankton, *Marine Biology*, 24(2), 147-154.
- Muggli, D. L., and P. J. Harrison (1996), Effects of nitrogen source on the physiology and metal nutrition of *Emiliana huxleyi* grown under different iron and light conditions, *Mar Ecol-Prog Ser*, 130(1-3), 255-267.
- Muggli, D. L., and P. J. Harrison (1997), Effects of iron on two oceanic phytoplankters grown in natural NE subarctic pacific seawater with no artificial chelators present, *Journal of Experimental Marine Biology and Ecology*, 212, 225-237.
- Muggli, D. L., M. Lecourt, and P. J. Harrison (1996), Effects of iron and nitrogen source on the sinking rate, physiology and metal composition of an oceanic diatom from the subarctic Pacific, *Marine ecology progress series*, 132, 215-227.
- Mulholland, M. R., and D. G. Capone (1999), Nitrogen fixation, uptake and metabolism in natural and cultured populations of *Trichodesmium* spp., *Mar Ecol-Prog Ser*, 188, 33-49.
- Nelson, D. M., and L. E. Brand (1979), CELL-DIVISION PERIODICITY IN 13 SPECIES OF MARINE-PHYTOPLANKTON ON A LIGHT-DARK CYCLE, *J Phycol*, 15(1), 67-75.
- Nielsen, M. V. (1995), PHOTOSYNTHETIC CHARACTERISTICS OF THE COCCOLITHOPHORID EMILIANA-HUXLEYI (PRYMNESIOPHYCEAE) EXPOSED TO ELEVATED CONCENTRATIONS OF DISSOLVED INORGANIC CARBON, *J Phycol*, 31(5), 715-719.
- Nielsen, M. V. (1996), Growth and chemical composition of the toxic dinoflagellate *Gymnodinium galatheanum* in relation to irradiance, temperature and salinity, *Mar Ecol-Prog Ser*, 136(1-3), 205-211.
- Nielsen, M. V. (1997), Growth, dark respiration and photosynthetic parameters of the coccolithophorid *Emiliana huxleyi* (Prymnesiophyceae) acclimated to different day length-irradiance combinations, *J Phycol*, 33(5), 818-822.
- Ohki, K., and Y. Fujita (1982), Laboratory Culture of the Pelagic Blue-Green-Alga *Trichodesmium-Thiebautii* - Conditions for Unialgal Culture, *Mar Ecol-Prog Ser*, 7(2), 185-190.
- Paasche, E. (1967), MARINE PLANKTON ALGAE GROWN WITH LIGHT-DARK CYCLES .I. COCCOLITHUS HUXLEYI, *Physiologia Plantarum*, 20(4), 946-&.
- Paasche, E. (1998), Roles of nitrogen and phosphorus in coccolith formation in *Emiliana huxleyi* (Prymnesiophyceae), *European Journal of Phycology*, 33(1), 33-42.
- Paasche, E. (1999), Reduced coccolith calcite production under light-limited growth: a comparative study of three clones of *Emiliana huxleyi* (Prymnesiophyceae), *Phycologia*, 38(6), 508-516.

- Paasche, E., and S. Brubak (1994), ENHANCED CALCIFICATION IN THE COCCOLITHOPHORID EMILIANIA-HUXLEYI (HAPTOPHYCEAE) UNDER PHOSPHORUS LIMITATION, *Phycologia*, 33(5), 324-330.
- Paasche, E., S. Brubak, S. Skattebol, J. R. Young, and J. C. Green (1996), Growth and calcification in the coccolithophorid *Emiliana huxleyi* (Haptophyceae) at low salinities, *Phycologia*, 35(5), 394-403.
- Parsons, T. R., K. Stephens, and J. D. H. Strickland (1961), ON THE CHEMICAL COMPOSITION OF 11 SPECIES OF MARINE PHYTOPLANKTERS, *Journal of the Fisheries Research Board of Canada*, 18(6), 1001-1016.
- Price, L. L., K. Yin, and P. J. Harrison (1998), Influence of continuous light and L : D cycles on the growth and chemical composition of Prymnesiophyceae including coccolithophores, *Journal of Experimental Marine Biology and Ecology*, 223(2), 223-234.
- Prufertbebout, L., H. W. Paerl, and C. Lassen (1993), Growth, Nitrogen-Fixation, and Spectral Attenuation in Cultivated *Trichodesmium* Species, *Appl Environ Microb*, 59(5), 1367-1375.
- Rhodes, L. L., B. M. Peake, A. L. Mackenzie, and S. Marwick (1995), COCCOLITHOPHORES GEPHYROCAPSA-OCEANICA AND EMILIANIA-HUXLEYI (PRYMNESIOPHYCEAE EQUALS HAPTOPHYCEAE) IN NEW-ZEALAND COASTAL WATERS - CHARACTERISTICS OF BLOOMS AND GROWTH IN LABORATORY CULTURE, *New Zealand Journal of Marine and Freshwater Research*, 29(3), 345-357.
- Riegman, R., I. A. Flameling, and A. A. M. Noordeloos (1998), Size-fractionated uptake of ammonium, nitrate and urea and phytoplankton growth in the North Sea during spring 1994, *Mar Ecol-Prog Ser*, 173, 85-94.
- Schoemann, V., S. Becquevort, J. Stefels, W. Rousseau, and C. Lancelot (2005), Phaeocystis blooms in the global ocean and their controlling mechanisms: a review, *J Sea Res*, 53(1-2), 43-66.
- Schone (1982), The influence of light and temperature on the growth rates of six phytoplankton species from the upwelling area off Northwest Africa, *Rapp. P.-v. Réun. Cons. int. Explor. Mer.*, 180, 246-253.
- Sosik, H. M., and B. G. Mitchell (1994), Effects of Temperature on Growth, Light-Absorption, and Quantum Yield in *Dunaliella-Tertiolecta* (Chlorophyceae), *J Phycol*, 30(5), 833-840.
- Steinke, M., G. V. Wolfe, and G. O. Kirst (1998), Partial characterisation of dimethylsulfoniopropionate (DMSP) lyase isozymes in 6 strains of *Emiliana huxleyi*, *Mar Ecol-Prog Ser*, 175, 215-225.
- Sunda, W., D. J. Kieber, R. P. Kiene, and S. Huntsman (2002), An antioxidant function for DMSP and DMS in marine algae, *Nature*, 418(6895), 317-320.
- Sunda, W. G., and S. A. Huntsman (1995), Iron uptake and growth limitation in oceanic and coastal phytoplankton, *Mar. Chem.*, 50(1-4), 189-206.
- Suzuki, Y., and M. Takahashi (1995), Growth responses of several diatom species isolated from various environments to temperature, *J Phycol*, 31, 880-888.
- Thompson, P. A. (1999), The response of growth and biochemical composition to variations in daylength, temperature, and irradiance in the marine diatom *Thalassiosira pseudonana* (Bacillariophyceae), *J Phycol*, 35(6), 1215-1223.
- Thompson, P. A., M.-X. Guo, and P. J. Harrison (1992), Effects of variation in temperature. I. On the biochemical composition of eight species of marine phytoplankton, *J Phycol*, 28(4), 481-488.

- Vairavamurthy, A., M. O. Andreae, and R. L. Iverson (1985), BIOSYNTHESIS OF DIMETHYLSULFIDE AND DIMETHYLPROPIOTHETIN BY HYMENOMONAS-CARTERAE IN RELATION TO SULFUR SOURCE AND SALINITY VARIATIONS, *Limnology and Oceanography*, 30(1), 59-70.
- van Rijssel, M., and W. W. C. Gieskes (2002), Temperature, light, and the dimethylsulfoniopropionate (DMSP) content of *Emiliana huxleyi* (Prymnesiophyceae), *J Sea Res*, 48(1), 17-27.
- Varela, D. E., and P. J. Harrison (1999), Effect of ammonium on nitrate utilization by *Emiliana huxleyi*, a coccolithophore from the oceanic northeastern Pacific, *Mar Ecol-Prog Ser*, 186, 67-74.
- Watabe, N., and K. M. Wilbur (1966), EFFECTS OF TEMPERATURE ON GROWTH CALCIFICATION AND COCCOLITH FORM IN COCCOLITHUS HUXLEYI (COCCOLITHINEAE), *Limnology and Oceanography*, 11(4), 567-&.
- Watras, C. J., S. W. Chisholm, and D. M. Anderson (1982), Regulation of Growth in an Estuarine Clone of *Gonyaulax-Tamarensis* Lebour - Salinity-Dependent Temperature Responses, *Journal of Experimental Marine Biology and Ecology*, 62(1), 25-37.
- Wolfe, G. V., and M. Steinke (1996), Grazing-activated production of dimethyl sulfide (DMS) by two clones of *Emiliana huxleyi*, *Limnology and Oceanography*, 41(6), 1151-1160.
- Yoder, J. A. (1979), Effect of temperature on light-limited growth and chemical composition of *Skeletonema costatum* (Bacillariophyceae), *J Phycol*, 15, 362-370.
- Zondervan, I. (2001), Influence of carbonate chemistry and other environmental factors on the chemical and isotopic composition of coccolithophores, with emphasis on calcification and photosynthetic carbon fixation, *PhD thesis, University of Bremen, Germany*, 170 pp.
