# Supplementary material for: Role of zooplankton dynamics for Southern Ocean phytoplankton biomass andglobal biogeochemical cycles
Source: Copernicus journal article supplement (doi:10.5194/bg-13-4111-2016), 2016-07-18
Supplement: Supplementary file [file bg-13-4111-2016-supplement-title-page.pdf › bg-13-4111-2016-supplement-title-page.pdf]

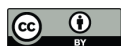

## *Supplement of*

# **Role of zooplankton dynamics for Southern Ocean phytoplankton biomass and global biogeochemical cycles**

**Corinne Le Quéré et al.**

*Correspondence to:* Corinne Le Quéré ([c.lequere@uea.ac.uk](mailto:c.lequere@uea.ac.uk))

- [bg-13-4111-2016-supplement-title-page.pdf](#)
- [PlankTOM10\\_Manual.pdf](#)
- [PlankTOM10\\_phytoplankton\\_growth\\_rates.pdf](#)

The copyright of individual parts of the supplement might differ from the CC-BY 3.0 licence.
